# Supplementary material for: General practitioners’ predictions of their own patients’ health literacy: a cross-sectional study in Belgium
Source: PubMed Central journal article supplement — BMJ Open. 2019 Sep 13;9(9):e029357. doi: 10.1136/bmjopen-2019-029357 (PMC6747646; doi:10.1136/bmjopen-2019-029357), 2019-09-13
Supplement: bmjopen-2019-029357.draft_revisions.pdf [file bmjopen-2019-029357.draft_revisions.pdf]

# BMJ Open

BMJ Open is committed to open peer review. As part of this commitment we make the peer review history of every article we publish publicly available.

When an article is published we post the peer reviewers' comments and the authors' responses online. We also post the versions of the paper that were used during peer review. These are the versions that the peer review comments apply to.

The versions of the paper that follow are the versions that were submitted during the peer review process. They are not the versions of record or the final published versions. They should not be cited or distributed as the published version of this manuscript.

BMJ Open is an open access journal and the full, final, typeset and author-corrected version of record of the manuscript is available on our site with no access controls, subscription charges or pay-per-view fees (<http://bmjopen.bmj.com>).

If you have any questions on BMJ Open's open peer review process please email [info.bmjopen@bmj.com](mailto:info.bmjopen@bmj.com)

# BMJ Open

## General practitioners cannot predict health literacy of their own patients

|                                                                                                                                                                |                                                                                                                                                                                                                                                                                                                                                                                                                                                                                                                                |
|----------------------------------------------------------------------------------------------------------------------------------------------------------------|--------------------------------------------------------------------------------------------------------------------------------------------------------------------------------------------------------------------------------------------------------------------------------------------------------------------------------------------------------------------------------------------------------------------------------------------------------------------------------------------------------------------------------|
| Journal:                                                                                                                                                       | <i>BMJ Open</i>                                                                                                                                                                                                                                                                                                                                                                                                                                                                                                                |
| Manuscript ID                                                                                                                                                  | bmjopen-2019-029357                                                                                                                                                                                                                                                                                                                                                                                                                                                                                                            |
| Article Type:                                                                                                                                                  | Research                                                                                                                                                                                                                                                                                                                                                                                                                                                                                                                       |
| Date Submitted by the Author:                                                                                                                                  | 23-Jan-2019                                                                                                                                                                                                                                                                                                                                                                                                                                                                                                                    |
| Complete List of Authors:                                                                                                                                      | Storms, Hannelore; Universiteit Hasselt Faculteit Geneeskunde en Levenswetenschappen, Aertgeerts, Bert; Katholieke Universiteit Leuven Groep Biomedische Wetenschappen, Department of Public Health and Primary Care Vandenabeele, Frank; Universiteit Hasselt Faculteit Geneeskunde en Levenswetenschappen; Universiteit Hasselt Faculteit Revalidatiewetenschappen<br>Claes, Neree; Universiteit Hasselt Faculteit Geneeskunde en Levenswetenschappen; Antwerp Management School, Faculty Leadership, Health Care Management |
| Keywords:                                                                                                                                                      | general practice, health literacy, doctor-patient communication, literacy, health disparities, health knowledge                                                                                                                                                                                                                                                                                                                                                                                                                |
| <p>Note: The following files were submitted by the author for peer review, but cannot be converted to PDF. You must view these files (e.g. movies) online.</p> |                                                                                                                                                                                                                                                                                                                                                                                                                                                                                                                                |
| <p>bmjopen STROBEchecklist.doc</p>                                                                                                                             |                                                                                                                                                                                                                                                                                                                                                                                                                                                                                                                                |

SCHOLARONE™  
Manuscripts

## General practitioners cannot predict health literacy of their own patients

Hannelore Storms (0000-0002-0987-0964)<sup>1</sup>, Bert Aertgeerts<sup>2</sup>, Frank Vandenabeele<sup>1,3</sup>, Neree Claes<sup>1,4,5</sup>

### Author affiliations

#### Hannelore Storms, MSc

<sup>1</sup> Faculty of Medicine and Life Sciences, Hasselt University, Hasselt, Belgium

Email: hannelore.storms@uhasselt.be

#### Bert Aertgeerts MD, PhD, Associate Professor

<sup>2</sup> Academic Centre for General Practice, Department of Public Health and Primary Care, KU Leuven, Leuven, Belgium

Email: bert.aertgeerts@kuleuven.be

#### Frank Vandenabeele MD, PhD, Associate Professor

<sup>1</sup> Faculty of Medicine and Life Sciences, Hasselt University, Hasselt, Belgium

<sup>3</sup> Faculty of Rehabilitation Sciences, Hasselt University, Hasselt, Belgium

Email: frank.vandenabeele@uhasselt.be

#### Neree Claes MD, PhD, MBA

<sup>1</sup> Faculty of Medicine and Life Sciences, Hasselt University, Hasselt, Belgium,

<sup>4</sup> Wit-Gele Kruis Limburg vzw, Genk, Belgium

<sup>5</sup> Antwerp Management School, Faculty Leadership, Health Care Management, Antwerp, Belgium

Email: nyree@vijgen-claes.be

**Correspondence to:** Hannelore Storms, Faculty of Medicine and Life Sciences, Hasselt University, 3500 Hasselt, Belgium; Hannelore.Storms@uhasselt.be

## Abstract

**Objectives** General practitioners (GPs) should be able to identify people with limited Health Literacy to adequately tailor patient information. Concordance between GPs' estimations of patients' HL and patients' self-reported HL was examined.

**Design** Cross-sectional study with paper based questionnaires (patients and GPs).

**Setting** GPs across 41 general practices (primary care) in two Flemish provinces (Belgium) in 2016-17.

**Participants** Adults without severe impairments (physical, mental, sensory) visiting practices of participating GPs.

**Main outcome measures** Patients' self-reported HL, using HLS-EU-Q16 (scale output: inadequate, problematic, adequate). GPs estimated HL on a corresponding scale. GP-patient acquaintance (frequency of GP visits and number of years patients have been consulting their GP). Generalized linear logit model (GPs' correct HL estimation as reference) was used to assess if patients' characteristics and/or GP-patient acquaintance impacts GP's HL under- or overestimation.

**Results** 1469 patients completed the study. Their mean age was 54.8 (SD 16.5) years and 63% were female; 8% (107/1399) had primary, 40% (563/1399) secondary; 48% (675/1399) higher education. GPs underestimating HL is more likely in patients with primary education than those with higher education, odds ratio 12.2 (95% confidence interval 4.80 to 30.99) for primary education; the likelihood to overestimate HL is higher in patients with a higher education compared to secondary education, odds ratio 1.38 (1.06 to 1.80) (N= 1260). There's an increased likelihood of HL underestimation when patients are seeing their GP less than one year compared to over ten years, odds ratio 4.48 (1.67 to 12.00) (N= 1260) .

**Conclusions** Intuitively assessing HL is difficult. The level of education and the number of years patients' have been consulting their GP impact HL perception. GPs need to be aware of HL and it being different from 'literacy'.

## Article Summary

### Article focus

- Correspond GPs' estimations of their patients' health literacy with patients' self-reported health literacy?

### Key findings

- The results show that health literacy is significantly overestimated in patients with higher education and those seeing their GP for over ten years.
- GPs significantly underestimate health literacy in patients with primary and secondary education and those seeing their GP less than one year.

### Strengths and limitations of this study

- This is an extensive study, with a large number of patients participating across several general practices.

- Paper-based HLS-EU-Q16 questionnaires were used to stimulate patients to self-report health literacy.
- Voluntary GP and patient participation was potentially selective due to the relatively small research window, survey weariness, reluctance to disclose difficulties regarding health communication.

## Introduction

Healthcare is facing enormous challenges. Care is shifting towards managing rather than curing diseases due to the aging of the population and the rising prevalence of chronic diseases and multi-morbidity. As a result, doctor-patient interactions are transforming into partnerships in which patients' needs, values and beliefs influence the course of the care process<sup>1,2</sup>. Besides being responsive to patients' needs, the complexity of healthcare forces healthcare professionals to also take into account patients' health literacy (HL).

HL is defined as one's 'knowledge, motivation and competences to access, understand, appraise, and apply health information in order to make judgments and take decisions in everyday life concerning healthcare, disease prevention and health promotion to maintain or improve quality of life during the life course'<sup>3</sup>. With the focus on patients managing their care, patients' knowledge, motivation, understanding and skills with regard to health information are important prerequisites to guarantee high quality care.

HL impacts on accessibility and utilization of care, doctor-patient communication, self-care, and, subsequently, health outcomes<sup>4-7</sup>. 47% of the population in eight European countries, and 40% of the Belgian population experience difficulties processing health-related information, hence, have problematic or inadequate HL<sup>8-14</sup>. Overall, people with limited HL may find it difficult to understand medication instructions, have poorer medication adherence<sup>7,10,15,16</sup>, use preventive services less<sup>7,17</sup>, have low self-efficacy<sup>18-20</sup>, struggle with self-managing chronic diseases<sup>7</sup> and have a worse health status than those with adequate HL<sup>7,21</sup>. Most at risk are non-native speakers, the elderly, and those with limited education<sup>10,13,22,23</sup>. To ensure patients receive appropriate care, healthcare professionals should make sure patients are (being) informed, have sufficient understanding, are given the opportunity to discuss treatment options and are involved in decision making<sup>2</sup>.

Awareness of people's understanding of health information and their ability - and willingness - to be involved in (decisions about) their care is essential to tailor information and guide patients through the health care system<sup>24,25</sup>. General practitioners (GPs) in particular are well-placed to ensure people receive the care that meets patients' needs. By communicating effectively and facilitating patients' involvement in their care process, GPs may contribute to improving health outcomes<sup>4,7,24</sup>. However, this requires GPs to be able to identify patients with limited HL.

To date, studies investigating health care professionals' abilities to identify people with limited HL are scarce. Moreover, the few - American - studies that were carried out, demonstrated health care professionals' inability to identify people with limited HL and predominantly overestimating HL<sup>26-28</sup>.

The aim of this research was to explore the concordance between patients' self-reported HL and GPs' HL estimations.

## Methods

### Study design

Cross-sectional study with paper based questionnaires (patient and GPs).

### Sample size

It was aimed to reach 39 GPs, 39 general practices and 2000 participants, in correspondence with previous research on patient satisfaction in Belgian general practices <sup>29</sup>.

### Enrollment

To recruit GPs, the researcher (HS) contacted 79 GPs working in two Belgian provinces of interest (Vlaams-Brabant and Limburg) (Fig. 1). Five GPs were in the direct network of the research team and immediately agreed to participate. Additionally, 73 out of 122 GPs responsible for organizing regional quality meetings for their peers were contacted through phone calls and email, resulting in 19 invites for the researcher to attend these GPs' regional quality meeting. During these meetings, GPs were informed about the HL-conceptual framework, the purpose and study design of this research. Following these meetings, 57 GPs across 46 general practices agreed to participate, although seven declined before setting up the research. Also, (some of) the colleagues within the practice of a GP who had agreed to participate signed up as well (38 GPs), leading to a variable number of participating GPs per practice. Enrollment and start-up took place between October 2016 and December 2017.

### Setting and participants

In each general practice, the research window was set to be minimal one month. Participation (GPs and patients) was voluntary, written informed consent from the latter was obtained prior to medical consultation. Adult patients of participating GPs' were eligible for inclusion. Patients were excluded when having a severe: cognitive impairment, sensory disability, psychological or psychiatric disorder. This exclusion was indicated by the participating GP.

### Data collection

#### *Patient survey*

In the waiting room, patients self-reported their age, gender, education, housing and occupational status (as proxies for socio-economic status). HL was measured using HLS-EU-Q16. Where a patient marked two adjacent Likert-scores, the lower (the one referring to experiencing difficulties) score was registered. Where a patient marked two Likert-scores within two points of each other, the middle value was registered (e.g. if 2 and 4 marked, 3 was registered).

#### *GP survey*

Prior to participation, GPs were educated about HL and how to fill out the GP questionnaire. Participating GPs' age, year of graduation, years working in current general practice were registered. This information was collected independently from the patient survey.

At the end of a participating patient's medical consultation, each GP registered patients' : age, HL-estimation (on a scale inadequate, problematic, adequate), GP-patient acquaintance (frequency of GP visits, number of years being consulted by that patient).

## Data analysis

Demographic data and HL (self-reported and estimated) were analyzed using descriptive statistics. Chi-square was used to test association of patients' HL level with patients' demographics (age, gender, education). Generalized linear logit model (with GPs' correct HL estimation as the reference) was used to assess if patients' education, age, gender and GPs' age, gender, number of years since graduation, number of years patients consult with their current GP, frequency of GP visits impacted under- or overestimation of HL by GPs; Missing values for a variable were not included in analyses. Statistical significance was assessed as  $p < 0.05$ . Data were analyzed with R.

## Ethical approval

This study was approved by the Ethical Committee of Hasselt University (CME2015/553). Prior to participation, participants received a full explanation of the purpose of the study, their rights as participants, anonymity and confidentiality of the data collected.

## Patient and public involvement

Patient were not involved in this research. However, prior to this study, the design has been explained in the context of the feasibility testing of the Dutch HLS-EU-Q16. Consequently, some patients were invited to comment on the study design. Patients did not interpret results nor did they contribute to the writing.

## Results

1835 surveys were filled out and returned. After checking for exclusion criteria, data represented 45 general practices, 83 GPs and 1674 eligible patients. Subsequently, some surveys were excluded because at least eight of 16 items of HLS-EU-Q16 were left unanswered, or data on HL were missing (from the part of GP and/or patient) (Fig. 2). Hence, the number of participants reduced to 1469 patients.

## Sample characteristics

Patients were 54.8 years old (SD 16.5); 63% were female; 48% was highly educated (N= 1399). The mean age of GPs was 42.8 years old (SD 13.5); 53% GPs were female (N= 80). Regarding GP-patient acquaintance, approximately 10% of the patients are seeing their GP for less than one year, 45% for over than 10 years (N= 1454). GPs were working on average 14.3 (SD 13.4) years in their current practice, with a maximum of 48 years (Table 1). Fifteen of the 41 general practices were solo practices; in 18 general practices, the number of GPs varied from three to seven. Six practices were located in four different regions with high population density, ten practices were located in five different multicultural regions.

## Health Literacy (mis)match

Most patients self-reported adequate HL (63%). GP's estimated HL of their patients to be adequate in 90%. HL of more than one third of the patients was overestimated by their GP. Of nearly all patients with inadequate, HL was overestimated by their GP (99%) (Table 2).

## Explaining health literacy estimations

1  
2  
3 Generalized logit model odds ratio's demonstrate GPs' under- or overestimation HL of patients to be  
4 significantly affected by the educational level of the patient, the number of years patients have been  
5 visiting their regular GP and the GPs' gender (N= 1260).  
6  
7

### 8 ***Patients' educational level***

9 HL of patients with 'higher education' is more likely to be underestimated compared to those with  
10 'secondary education' (OR = 1.38 with 95% CI [1.06 ; 1.80]). HL overestimation is significantly higher  
11 for patients with 'primary education' versus 'higher education'; and 'secondary education' versus  
12 'higher education', respectively 12.2 (with 95% CI [4.80 ; 30.99]) and 4.1 times (with 95% CI [1.95 ;  
13 8.42]) (Fig. 3 (bottom)).  
14  
15

### 16 ***Length of GP-patient acquaintance***

17 It is more likely GPs overestimate HL of patients they know 'over 10 years', compared to 'one up to  
18 five years' (OR =1.64 with 95% CI [1.25 ; 2.14]). The odds of underestimating HL are higher for  
19 patients who have been seeing their GP for a time: HL is more likely underestimated in patients  
20 seeing their GP 'less than one year' versus 'more than 10 years' (OR = 4.48 with 95% CI [1.67 ; 12.00])  
21 and 'one up to five years' compared to 'more than 10 years' (OR = 3.10 with 95% CI [1.60 ; 5.97], (Fig.  
22 3 (middle)).  
23  
24  
25

### 26 ***Gender of GPs***

27 Comparing under- and overestimating HL, the odds of overestimating HL versus underestimating  
28 when a GP is female is 0.5 times the odds of HL overestimation versus HL underestimation when a GP  
29 is male (Fig. 3 (top)).  
30  
31  
32  
33  
34  
35  
36  
37  
38  
39  
40  
41  
42  
43  
44  
45  
46  
47  
48  
49  
50  
51  
52  
53  
54  
55  
56  
57  
58  
59  
60



**Table 1 Sample characteristics**

|                                                       | <b>Patients (n= 1455)</b> | <b>General practitioners (n= 80)</b> |
|-------------------------------------------------------|---------------------------|--------------------------------------|
| <b>Gender (% female)</b>                              | 63%                       | 53%                                  |
| <b>Mean age (SD); [range]</b>                         | 54.8 (SD 16.5); [18-100]  | 42.8 (SD 13.5); [25-73]              |
| <b>Educational attainment (n= 1399)</b>               |                           | N/A                                  |
| no formal education                                   | 3.9%                      |                                      |
| primary education                                     | 7.6%                      |                                      |
| secondary education                                   | 40.2%                     |                                      |
| higher education                                      | 48.2%                     |                                      |
| <b>Number of years patients have been visiting GP</b> |                           |                                      |
| < 1 y                                                 | 9.8%                      |                                      |
| 1 - 5 y                                               | 29.9%                     |                                      |
| 6 - 10 y                                              | 15.4%                     |                                      |
| > 10 y                                                | 44.8%                     |                                      |
| <b>Years graduated</b>                                |                           | 17.3 (SD 13.3)                       |
| <b>Years working in current practice</b>              | N/A                       | 14.3 (SD 13.4)                       |

**Table 2 GPs' Health Literacy estimation per level of self-reported Health Literacy (n= 1469)**

| Self-reported HL     | GPs' HL estimation |       |           |
|----------------------|--------------------|-------|-----------|
| Adequate (n= 927)    | Correct            | 92.6% |           |
|                      | Incorrect          | 7.4%  | 7.2% ▽    |
|                      |                    |       | 0.2% ▽ ▽  |
| Problematic (n= 327) | Correct            | 9.5%  |           |
|                      | Incorrect          | 90.5% | 90.2% ▲   |
|                      |                    |       | 0.3% ▽    |
| Inadequate (n= 215)  | Correct            | 0.9%  |           |
|                      | Incorrect          | 99.1% | 80.0% ▲ ▲ |
|                      |                    |       | 19.1% ▲   |

GPs estimate HL one (▽/▲) or two (▽▽/▲▲) levels lower/higher than self-reported HL

## Discussion

Our findings demonstrate GPs' predominantly overestimating their patients' HL. Patient's level of education and the length of patients' relationship with their GP significantly impacts both HL over- and underestimation. Regarding education, HL is more likely to be overestimated in highly educated patients; Comparing educational levels, HL is significantly underestimated (12.2 times) when having a primary education and when having secondary education (4.1 times) compared to higher education.

### Comparison with previous studies

The majority of GPs perceived their patients to have adequate HL, although 10% of patients' self-reported inadequate HL<sup>9,12</sup>. This corresponds to previous research in a hospital setting demonstrating doctors' HL overestimation outnumbering underestimation with nearly 2-to-1<sup>26</sup>. A similar outcome was reported, focusing on nurses<sup>28</sup>. Just one study described primary care physicians overestimating patients literacy<sup>27</sup>.

### Education

GPs seem to seek guidance in patients' educational level when estimating HL, although we are not sure patients ever explicitly disclosed their educational level to GP. Numerous studies have demonstrated the correlation between HL and education<sup>9,22,23</sup>: lower HL is observed in people with lower educational levels, although highly educated people may also have poor HL<sup>12,23</sup>. Despite of its correlation with HL, there's a fundamental difference between literacy and HL, which is emphasized in several studies<sup>9,12,23</sup>. Undoubtedly, literacy is a vital skill to function with or within the contemporary health care system. However, complementary, advanced skills are necessary to execute instructions, interact with healthcare professionals and critically appraise information<sup>20,30,31</sup>. If our findings are an expression of GPs' presuming highly educated patients do not experience difficulties acting upon health information, these results are potentially problematic.

### GP – patient acquaintance

The significant HL overestimation in patients seeing their GP for over ten years we found remarkable because we would have expected long standing doctor-patient relationships to contribute to GPs' better understanding of their 'long-term' patients, for instance, their background, social network,... In comparison, the HL underestimations when patients have been seeing their GP for a relatively short period of time we would find less surprising, if this would express a cautious approach due to GPs and patients being less acquainted. Little comparable research was found that could explain our findings. Consequently, we turned to studies focusing on continuity of care, a key dimension of good primary care<sup>32</sup>. If we would consider continuity of care and a long relationship to be analogous, findings of previous studies are in contrast to the one's we reported. For instance, it is reported to correlate with improved adherence to physicians' instructions<sup>33</sup> and better communication<sup>34</sup>. Also, being cared for less than one year by the same care provider was associated with decreasing communication excellence<sup>35</sup>. Although (dis)satisfaction with communication may stem from being unaware of patients' HL, we did not find studies linking their results to patients' knowledge, their understanding of or the processing of health information.

### Implications & recommendations for clinical practice

GPs in our research were often not able to estimate HL of their patients. We would recommend GPs to perform some sort of HL assessment, instead of going by intuition. Therefore, feasible alternatives

1  
2  
3 for clinical practice should be considered <sup>36</sup>, such as using single item questions <sup>28,37</sup>, preferably  
4 tested by the target group to avoid comprehension problems <sup>38–40</sup>, but, above all, asking patients  
5 directly about their understanding and the kind of information and/or (practical) support they might  
6 need, will in general turn out to be much easier.  
7

8  
9 Moreover, educating (future) GPs and making them familiar with the HL-concept and the  
10 implications of low HL is a prerequisite to address HL <sup>41</sup>. GPs should get to know their patients. In  
11 particular it is important to know who is experiencing barriers to care and how to reach them. Being  
12 able to identify people with limited HL will help GPs to tackle health inequalities, for example by  
13 adequate information exchange. Hence, GPs should be equipped with a variety of strategies they can  
14 integrate in their day-to-day practice to communicate on a low HL-level <sup>41–43</sup>.  
15  
16

### 17 **Strengths and limitations**

18  
19 GP participation was potentially selective, although several attempts to contact and motivate GPs  
20 were undertaken. Given, selection bias may have occurred in the relatively small research window.  
21 Some patients might not have had the chance to participate because of not visiting their GP, some  
22 patients may have felt reluctant <sup>44</sup> or ashamed to disclose HL information <sup>45,46</sup>. Survey weariness, the  
23 length or usability of a paper-based questionnaire may have discouraged patients from participating,  
24 particularly more vulnerable patients (illiterate, non-natives). Nevertheless, many patients with low  
25 HL and low education participated. People experiencing barriers to care may have been missed. If so,  
26 their participation would have enriched data if the reason for not visiting their GP or for not  
27 participating would be linked to HL, for example because of low trust in GPs or poor self-related  
28 health <sup>47</sup>. Some GPs had the impression the majority of participating patients were natives and/or  
29 involved, empowered patients, thus, not reflecting the diversity in their patient population. This  
30 limitation also makes our findings more powerful. If patients whose HL is incorrectly estimated, do  
31 not represent minority groups or patients experiencing some vulnerability, this implies GPs assuming  
32 these patients to adequately function in a healthcare setting. It certainly, would have been  
33 interesting to see if results would have been different with a more diverse sample.  
34  
35

36  
37 This research is based on self-reported HL, which is inherently prone to subjectivity, as opposed to  
38 objective HL tools with the purpose of examining people succeeding in specific problem-solving tasks.  
39 Nonetheless, self-reported questions are considered valid and feasible methods to assess HL <sup>48–50</sup>.  
40 Both self-reported and objective HL measurements benefit of being tailored to targeted groups.  
41 Unless it's part of the design, tests relying on vocabulary unfamiliar to the target group –terms they  
42 do not come across in everyday live - enhances the difficulty of a particular tool. Consequently  
43 reflecting understanding of the tool itself rather than one's HL<sup>39</sup>. Mindful of potential comprehension  
44 problems, HLS-EU-Q16's feasibility was tested prior to this study <sup>38</sup>. In correspondence with other  
45 studies, the level of abstraction or lacking experience regarding some health-related tasks in health  
46 care, health promotion and disease prevention made it difficult to answer some items, but overall  
47 HLS-EU-Q16 was considered a feasible instrument<sup>38,39</sup>.  
48  
49  
50  
51  
52  
53

### 54 **Conclusion**

55  
56 Intuitively assessing patients' HL is difficult. Patients' education is not a good indicator for their HL.  
57 Consequently, GPs should be aware of HL and it being different from 'literacy' (i.e. education). It  
58 would be beneficial to facilitate and encourage GPs to get a profound understanding of their patients  
59  
60

1  
2  
3 and their lives. With the redesigning of health care to integrated care there's an opportunity to  
4 promote in-depth communication as the cornerstone for everyone to access adequate care. To be  
5 incorporated in daily practice, GPs should be allowed to invest a sufficient amount of time to getting  
6 to know their patients.  
7

## 8 9 **Acknowledgements**

10  
11 We thank GPs, their support staff and patients at all general practices, without whom this study  
12 would not have been possible. We greatly appreciate the support and the contribution of the  
13 consultants of I-BioStat, Center for Statistics, UHasselt. Last but not least, a special thanks to those  
14 helping out with the logistics.  
15

## 16 17 **Contributors**

18  
19 HS was responsible for study concept and design (with valuable input from BA and NC) and for data  
20 acquisition and for initial analyses. Data interpretation with all authors (HS, BA, FV, NC) led to a  
21 manuscript drafted by HS. All authors substantially contributed to critically reviewing the manuscript  
22 and all read and approved the final version. All authors had full access to all of the study data and  
23 take responsibility for the integrity of the data and the accuracy of the data. The corresponding  
24 author attests that all listed authors meet authorship criteria and that no others meeting the criteria  
25 have been omitted.  
26  
27

## 28 29 **Funding**

30  
31 This research received no specific grant from any funding agency in the public, commercial or not-  
32 for-profit sectors.  
33

## 34 35 **Competing interests**

36  
37 All authors have completed the ICMJE uniform disclosure form  
38 at [www.icmje.org/coi\\_disclosure.pdf](http://www.icmje.org/coi_disclosure.pdf) and declare: no support from any organisation for the  
39 submitted work; no financial relationships with any organisations that might have an interest in the  
40 submitted work in the previous three years; no other relationships or activities that could appear to  
41 have influenced the submitted work.  
42

## 43 44 **Ethical approval**

45  
46 This study was approved by the Ethical Committee of Hasselt University (CME2015/553). Prior to  
47 participation, participants received a full explanation of the purpose of the study, their rights as  
48 participants, anonymity and confidentiality of collected data.  
49

## 50 51 **Transparency**

52  
53 The lead author affirms that this manuscript is an honest, accurate, and transparent account of the  
54 study being reported; that no important aspects of the study have been omitted; and that any  
55 discrepancies from the study as planned (and if relevant registered) have been explained.  
56

## 57 58 **Data sharing**

1  
2  
3 The dataset used and/or analyzed during the current study are available from the corresponding  
4 author upon reasonable request.  
5

## 6 **Figure legends**

7  
8 Fig. 1 Recruitment of general practitioners  
9

10  
11 Fig. 2 Flowchart excluded questionnaires  
12

13 Fig. 3 Health Literacy (mis)match versus GPs' gender (top), GP-patient acquaintance (middle),  
14 patients' education (bottom)  
15  
16  
17  
18  
19  
20  
21  
22  
23  
24  
25  
26  
27  
28  
29  
30  
31  
32  
33  
34  
35  
36  
37  
38  
39  
40  
41  
42  
43  
44  
45  
46  
47  
48  
49  
50  
51  
52  
53  
54  
55  
56  
57  
58  
59  
60

For peer review only

## References

1. Epstein R., Kevin F, Cara S., Kurt C. Why the Nation Needs a Policy Push on Patient-centred Care. *Health Aff.* 2010;29(8):1489–95.
2. Epstein RM, Street RL. The Values and Value of Patient-Centered Care. *Ann Fam Med.* 2011;9(2):100–3.
3. Sørensen K, Van den Broucke S, Fullam J, Doyle G, Pelikan J, Slonska Z, et al. Health literacy and public health: a systematic review and integration of definitions and models. *BMC Public Health.* 2012;12(1):80.
4. Stewart MA. Effective physician-patient communication and health outcomes: a review. *CMAJ.* 1995;152(9):1423–33.
5. Lindau ST, Tomori C, Lyons T, Langseth L, Bennett CL, Garcia P. The association of health literacy with cervical cancer prevention knowledge and health behaviors in a multiethnic cohort of women. *Am J Obstet Gynecol.* 2002;186(5):938–43.
6. Paasche-Orlow MK, Wolf MS. The Causal Pathways Linking Health Literacy to Health Outcomes. *Am J Health Behav.* 2007;31(1):19–26.
7. Berkman ND, Sheridan SL, Donahue KE, Halpern DJ, Crotty K. Low Health Literacy and Health Outcomes: An Updated Systematic Review. *Ann Intern Med.* 2011;155(2):97.
8. Vancorenland S, Avalosse H, Verniest R, Callens M, Van den Broucke S, Renwart A, et al. Bilan des connaissances des Belges en matière de santé. *MC-Information.* 2014;258:48–55.
9. Van den Broucke S, Renwart A. La littératie en santé en Belgique: un médiateur des inégalités sociales et des comportements de santé. Université Catholique de Louvain. 2014.
10. Institute of Medicine. *Health Literacy: A Prescription to End Confusion.* Washington, D.C.: National Academies Press; 2004. 366 p.
11. Kirsch IS, Jungeblut A, Jenkins L, Kolstad A. *Adult literacy in America: A first look at the results of the National Adult Literacy Survey.* Office of Educational Research and Improvement, U.S. Dept. of Education. Washington, D.C.; 1993. 178 p.
12. Kickbush I, Pelikan JM, Apfel F, Tsouros A. *Health Literacy: The solid facts.* World Health Organisation (WHO): Regional Office for Europe. Copenhagen; 2013.
13. Sørensen K, Pelikan JM, Röthlin F, Ganahl K, Slonska Z, Doyle G, et al. Health literacy in Europe: comparative results of the European health literacy survey (HLS-EU). *Eur J Public Health.* 2015;25(6):1053–8.
14. Vandebosch J, Van den Broucke S, Vancorenland S, Avalosse H, Verniest R, Callens M. Health literacy and the use of healthcare services in Belgium. *J Epidemiol Community Health.* 2016;70(10):1032–8.
15. Shrank WH, Avorn J. Educating Patients About Their Medications: The Potential And Limitations Of Written Drug Information. *Health Aff.* 2007;26(3):731–40.
16. Zhang NJ, Terry A, McHorney CA. Impact of Health Literacy on Medication Adherence. *Ann Pharmacother.* 2014;48(6):741–51.
17. Miller DP, Brownlee CD, McCoy TP, Pignone MP. The effect of health literacy on knowledge

- 1  
2  
3 and receipt of colorectal cancer screening: a survey study. *BMC Fam Pract.* 2007;8(1):16.  
4  
5 18. Baker DW, Parker RM, Williams M V., Pitkin K, Parikh NS, Coates W, et al. The Health Care  
6 Experience of Patients with Low Literacy. *Arch Fam Med.* 1996;5(6):329–34.  
7  
8 19. Sarkar U, Fisher L, Schillinger D. Is self-efficacy associated with diabetes self-management  
9 across race/ethnicity and health literacy? *Diabetes Care.* 2006;29(4):823–9.  
10  
11 20. Nutbeam D. Health literacy as a public health goal: a challenge for contemporary health  
12 education and communication strategies into the 21st century. *Health Promot Int.*  
13 2000;15(3):259–67.  
14  
15 21. Baker DW. Health Literacy and Mortality Among Elderly Persons. *Arch Intern Med.*  
16 2007;167(14):1503.  
17  
18 22. van der Heide I, Rademakers J, Schipper M, Droomers M, Sørensen K, Uiters E. Health literacy  
19 of Dutch adults: a cross sectional survey. *BMC Public Health.* 2013;13:179.  
20  
21 23. van der Heide I, Wang J, Droomers M, Spreeuwenberg P, Rademakers J, Uiters E. The  
22 Relationship Between Health, Education, and Health Literacy: Results From the Dutch Adult  
23 Literacy and Life Skills Survey. *J Health Commun.* 2013;18(sup1):172–84.  
24  
25 24. Schillinger D, Piette J, Grumbach K, Wang F, Wilson C, Daher C, et al. Closing the loop:  
26 Physician Communication with Diabetic Patients Who Have Low Health Literacy. *Arch Intern*  
27 *Med.* 2003;163:83–90.  
28  
29 25. Bergeson SC, Dean JD. A Systems Approach to Patient-Centered Care. *JAMA.* 2006 Dec  
30 20;296(23):2848.  
31  
32 26. Bass PF, Wilson JF, Griffith CH, Barnett DR. Residents' ability to identify patients with poor  
33 literacy skills. *Acad Med.* 2002;77(10):1039–41.  
34  
35 27. Kelly PA, Haidet P. Physician overestimation of patient literacy: A potential source of health  
36 care disparities. *Patient Educ Couns.* 2007;66(1):119–22.  
37  
38 28. Dickens C, Lambert BL, Cromwell T, Piano MR. Nurse Overestimation of Patients' Health  
39 Literacy. *J Health Commun.* 2013;18(sup1):62–9.  
40  
41 29. Wensing M, Vedsted P, Kersnik J, Peersman W, Klingenberg A, Hearnshaw H, et al. Patient  
42 satisfaction with availability of general practice: An international comparison. *Int J Qual Heal*  
43 *Care.* 2002;14(2):111–8.  
44  
45 30. Heijmans M, Waverijn G, Rademakers J, van der Vaart R, Rijken M. Functional, communicative  
46 and critical health literacy of chronic disease patients and their importance for self-  
47 management. *Patient Educ Couns.* 2015;98(1):41–8.  
48  
49 31. van der Heide I, Heijmans M, Schuit AJ, Uiters E, Rademakers J. Functional, interactive and  
50 critical health literacy: Varying relationships with control over care and number of GP visits.  
51 *Patient Educ Couns.* 2015;98(8):998–1004.  
52  
53 32. Starfield B, Shi L, Macinko J. Contribution of primary care to health systems and health.  
54 *Milbank Q.* 2005;83(3):457–502.  
55  
56 33. Dietrich AJ, Marton KI. Does continuous care from a physician make a difference? *J Fam Pract.*  
57 1982;15(5):929–37.  
58  
59  
60



- 1
- 2
- 3 34. Potter SJ, McKinlay JB. From a relationship to encounter: An examination of longitudinal and
- 4 lateral dimensions in the doctor-patient relationship. *Soc Sci Med.* 2005;61(2):465–79.
- 5
- 6 35. Katz DA, McCoy K, Sarrazin MV. Does Improved Continuity of Primary Care Affect Clinician–
- 7 Patient Communication in VA? *J Gen Intern Med.* 2014;29(S2):682–8.
- 8
- 9 36. Weiss BD. Quick Assessment of Literacy in Primary Care: The Newest Vital Sign. *Ann Fam Med.*
- 10 2005;3(6):514–22.
- 11
- 12 37. Wallace LS, Cassada DC, Rogers ES, Freeman MB, Grandas OH, Stevens SL, et al. Can Screening
- 13 Items Identify Surgery Patients at Risk of Limited Health Literacy? *J Surg Res.*
- 14 2007;140(2):208–13.
- 15
- 16 38. Storms H, Claes N, Aertgeerts B, Van Den Broucke S. Measuring health literacy among low
- 17 literate people: an exploratory feasibility study with the HLS-EU questionnaire. *BMC Public*
- 18 *Health.* 2017;17(1).
- 19
- 20 39. Domanska OM, Firnges C, Bollweg TM, Sørensen K, Holmberg C, Jordan S. Do adolescents
- 21 understand the items of the European Health Literacy Survey Questionnaire (HLS-EU-Q47) -
- 22 German version? Findings from cognitive interviews of the project “Measurement of Health
- 23 Literacy Among Adolescents” (MOHLAA) in Germany. *Arch Public Heal.* 2018;76(1).
- 24
- 25 40. Murugesu L, Heijmans M, Fransen M, Rademakers J. Beter omgaan met beperkte
- 26 gezondheidsvaardigheden in de curatieve zorg: kennis, methoden en tools [Dealing with
- 27 limited health literacy in curative care: knowledge, methods and tools.]. Utrecht; 2018.
- 28
- 29 41. Kripalani S, Weiss BD. Teaching about health literacy and clear communication. *J Gen Intern*
- 30 *Med.* 2006;21(8):888–90.
- 31
- 32 42. Mackert M, Ball J, Lopez N. Health literacy awareness training for healthcare workers:
- 33 Improving knowledge and intentions to use clear communication techniques. *Patient Educ*
- 34 *Couns.* 2011;85(3):e225–8.
- 35
- 36 43. Karuranga S, Sørensen K, Coleman C, Mahmud AJ. Health Literacy Competencies for European
- 37 Health Care Personnel. *HLRP Heal Lit Res Pract.* 2017;1(4):e247–56.
- 38
- 39 44. Ryan JG, Leguen F, Weiss BD, Albury S, Jennings T, Velez F, et al. Will patients agree to have
- 40 their literacy skills assessed in clinical practice? *Health Educ Res.* 2008;23(4):603–11.
- 41
- 42 45. Parikh NS, Parker RM, Nurss JR, Baker DW, Williams M V. Shame and health literacy: The
- 43 unspoken connection. *Patient Educ Couns.* 1996;27(1):33–9.
- 44
- 45 46. Weiss BD. Health literacy and patient safety: Help patients understand (manual for clinicians).
- 46 American Medical Association Foundation and American Medical Association. Chicago; 2007.
- 47
- 48 47. Verlinde E, Poppe A, Desmet A, Hermans K, De Maeseneer J, Van Audenhove C, et al. Social
- 49 differences in postponing a General Practitioner visit in Flanders, Belgium: Which low-income
- 50 patients are most at risk? *Heal Soc Care Community.* 2013;21(4):364–72.
- 51
- 52 48. Chew LD, Bradley KA, Boyko EJ. Brief questions to identify patients with inadequate health
- 53 literacy. *Fam Med.* 2004;36(8):588–94.
- 54
- 55 49. Chew LD, Griffin JM, Partin MR, Noorbaloochi S, Grill JP, Snyder A, et al. Validation of
- 56 screening questions for limited health literacy in a large VA outpatient population. *J Gen*
- 57 *Intern Med.* 2008;23(5):561–6.
- 58
- 59
- 60

- 1  
2  
3 50. Powers BJ, Trinh J V, Bosworth HB. Can This Patient Read and Understand Written Health  
4 Information? JAMA. 2010;304(1):76.  
5  
6  
7  
8  
9  
10  
11  
12  
13  
14  
15  
16  
17  
18  
19  
20  
21  
22  
23  
24  
25  
26  
27  
28  
29  
30  
31  
32  
33  
34  
35  
36  
37  
38  
39  
40  
41  
42  
43  
44  
45  
46  
47  
48  
49  
50  
51  
52  
53  
54  
55  
56  
57  
58  
59  
60

For peer review only

1  
2  
3  
4  
5  
6  
7  
8  
9  
10  
11  
12  
13  
14  
15  
16  
17  
18  
19  
20  
21  
22  
23  
24  
25  
26  
27  
28  
29  
30  
31  
32  
33  
34  
35  
36  
37  
38  
39  
40  
41  
42  
43  
44  
45  
46  
47  
48  
49  
50  
51  
52  
53  
54  
55  
56  
57  
58  
59  
60

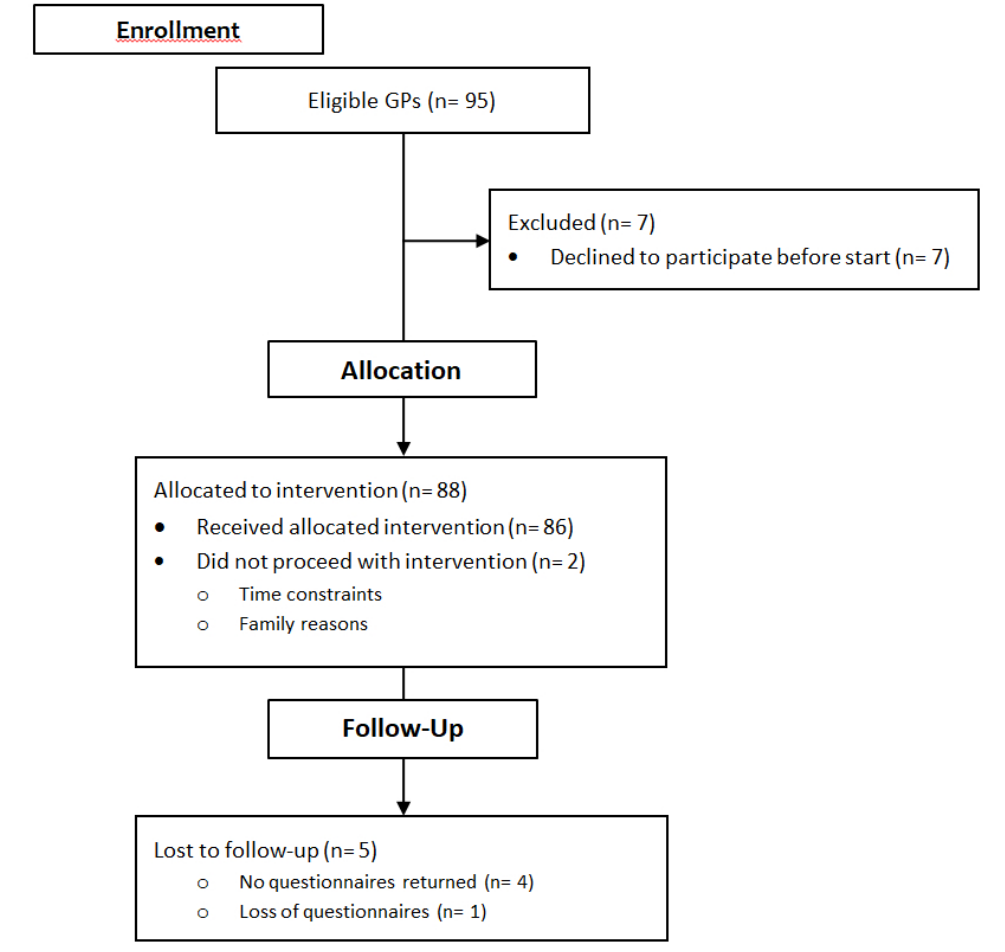

Fig. 1 Recruitment of general practitioners

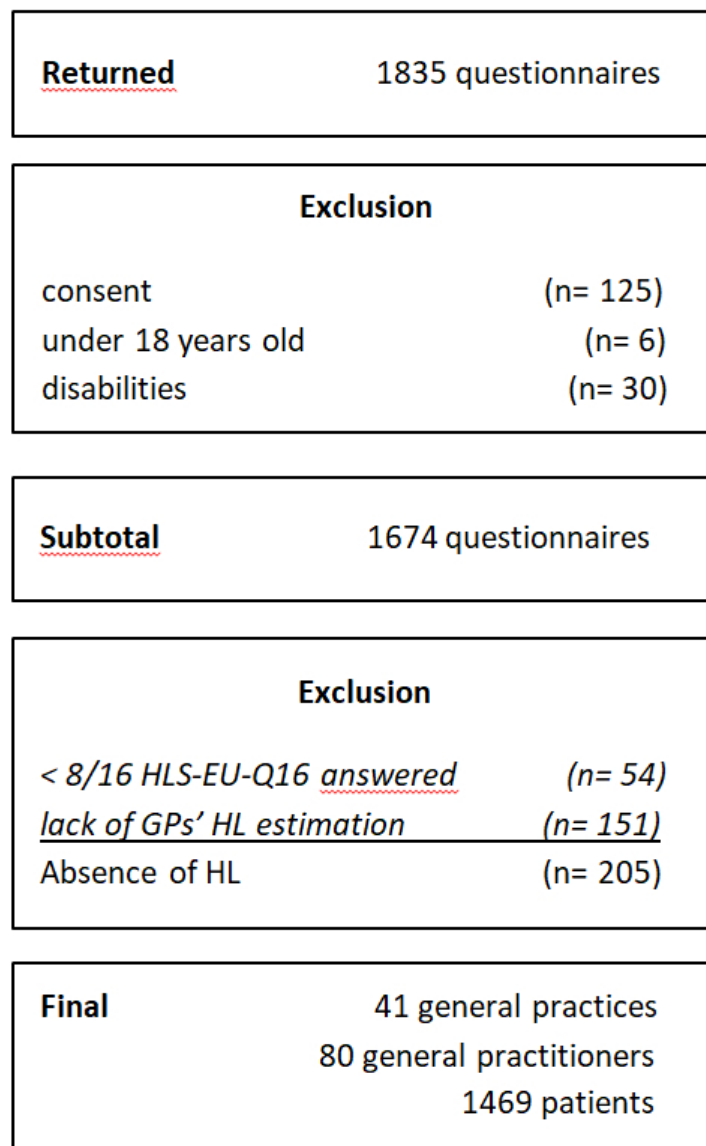

Fig. 2 Flowchart excluded questionnaires

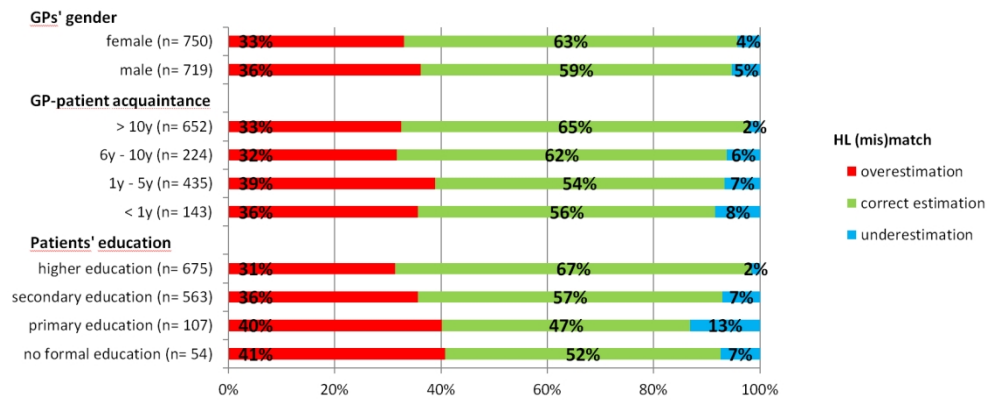

Fig. 3 Health Literacy (mis)match versus GPs' gender (top), GP-patient acquaintance (middle), patients' education (bottom)

# BMJ Open

## General practitioners' predictions of their own patients' health literacy: a cross-sectional study in Belgium

|                                 |                                                                                                                                                                                                                                                                                                                                                                                                                                                                                                                                |
|---------------------------------|--------------------------------------------------------------------------------------------------------------------------------------------------------------------------------------------------------------------------------------------------------------------------------------------------------------------------------------------------------------------------------------------------------------------------------------------------------------------------------------------------------------------------------|
| Journal:                        | <i>BMJ Open</i>                                                                                                                                                                                                                                                                                                                                                                                                                                                                                                                |
| Manuscript ID                   | bmjopen-2019-029357.R1                                                                                                                                                                                                                                                                                                                                                                                                                                                                                                         |
| Article Type:                   | Research                                                                                                                                                                                                                                                                                                                                                                                                                                                                                                                       |
| Date Submitted by the Author:   | 02-May-2019                                                                                                                                                                                                                                                                                                                                                                                                                                                                                                                    |
| Complete List of Authors:       | Storms, Hannelore; Universiteit Hasselt Faculteit Geneeskunde en Levenswetenschappen, Aertgeerts, Bert; Katholieke Universiteit Leuven Groep Biomedische Wetenschappen, Department of Public Health and Primary Care Vandenabeele, Frank; Universiteit Hasselt Faculteit Geneeskunde en Levenswetenschappen; Universiteit Hasselt Faculteit Revalidatiewetenschappen<br>Claes, Neree; Universiteit Hasselt Faculteit Geneeskunde en Levenswetenschappen; Antwerp Management School, Faculty Leadership, Health Care Management |
| <b>Primary Subject Heading</b>: | General practice / Family practice                                                                                                                                                                                                                                                                                                                                                                                                                                                                                             |
| Secondary Subject Heading:      | Communication, Patient-centred medicine, Public health, Health services research, Health policy                                                                                                                                                                                                                                                                                                                                                                                                                                |
| Keywords:                       | general practice, health literacy, doctor-patient communication, literacy, health disparities, health knowledge                                                                                                                                                                                                                                                                                                                                                                                                                |
|                                 |                                                                                                                                                                                                                                                                                                                                                                                                                                                                                                                                |

SCHOLARONE™  
Manuscripts

1  
2  
3 **General practitioners' predictions of their own patients' health literacy: a**  
4 **cross-sectional study in Belgium**  
5

6  
7 Hannelore Storms (0000-0002-0987-0964)<sup>1</sup>, Bert Aertgeerts<sup>2</sup>, Frank Vandenabeele<sup>1,3</sup>, Neree Claes<sup>1,4,5</sup>  
8

9 **Author affiliations**

10  
11 **Hannelore Storms, MSc**

12  
13 <sup>1</sup> Faculty of Medicine and Life Sciences, Hasselt University, Hasselt, Belgium

14  
15 Email: hannelore.storms@uhasselt.be  
16

17 **Bert Aertgeerts MD, PhD, Associate Professor**

18  
19 <sup>2</sup> Academic Centre for General Practice, Department of Public Health and Primary Care, KU Leuven,  
20 Leuven, Belgium

21  
22 Email: bert.aertgeerts@kuleuven.be  
23

24  
25 **Frank Vandenabeele MD, PhD, Associate Professor**

26  
27 <sup>1</sup> Faculty of Medicine and Life Sciences, Hasselt University, Hasselt, Belgium

28  
29 <sup>3</sup> Faculty of Rehabilitation Sciences, Hasselt University, Hasselt, Belgium

30  
31 Email: frank.vandenabeele@uhasselt.be  
32

33 **Neree Claes MD, PhD, MBA**

34  
35 <sup>1</sup> Faculty of Medicine and Life Sciences, Hasselt University, Hasselt, Belgium,

36  
37 <sup>4</sup> Wit-Gele Kruis Limburg vzw, Genk, Belgium

38  
39 <sup>5</sup> Antwerp Management School, Faculty Leadership, Health Care Management, Antwerp, Belgium

40  
41 Email: nyree@vijgen-claes.be  
42  
43  
44  
45

46 **Correspondence to:** Hannelore Storms, Faculty of Medicine and Life Sciences, Hasselt University,  
47 3500 Hasselt, Belgium; Hannelore.Storms@uhasselt.be  
48  
49  
50  
51  
52  
53  
54  
55  
56  
57  
58  
59  
60

## Abstract

**Objectives** To support patients in their disease management, providing information that is adjusted to patients' knowledge and ability to process health information (i.e. health literacy) is crucial. To ensure effective health communication, general practitioners (GPs) should be able to identify people with limited health literacy. To this end, agreement between patients' health literacy and GPs' estimations thereof and characteristics impacting on health literacy disagreement were examined.

**Design** Cross-sectional survey of general practice patients and GPs undertaken in 2016-17

**Setting** Forty-one general practices in two Dutch-speaking provinces in Belgium.

**Participants** Patients (18 years of age and older) visiting general practices. Patients were excluded when having severe impairments (physical, mental, sensory), as documented by a participating GP.

**Main outcome measures** Patients' health literacy was assessed with HLS-EU-Q16 (scale output: inadequate, problematic, adequate). Using a simple scale (inadequate; problematic; adequate) GPs indicated estimations on patients' health literacy. Agreement between patients' health literacy and GPs' estimations thereof was measured using Kappa statistics. Generalized linear logit model examined the impact of patients' sex, age, education, number of years consulting their GP, sex of GP on GPs' higher/lower health literacy estimates (over-/underestimating) than patients' actual health literacy.

**Results** Health literacy of patients (n= 1375) was inadequate (201), problematic (299), adequate (875). GPs' estimations corresponded for 2% inadequate, 43% problematic, 143% adequate health literate patients. There was a slight agreement between patients' health literacy and GPs' estimations thereof (Kappa = .033). The likelihood for GPs to over- or underestimate patients' health literacy increases with decreasing educational level of patients; and decreasing number of years patients have been consulting with their GP.

**Conclusions** Intuitively assessing health literacy is difficult. Patient's education, the number of years patients have been consulting with their GP and sex of the GP impact on GP's perception of a patient's health literacy.

## Article Summary

### Strengths and limitations of this study

- This is an extensive study, with a large number of patients participating across several general practices.
- Paper-based HLS-EU-Q16 questionnaires were used to stimulate patients to fill out the health literacy survey.
- Voluntary GP and patient participation was potentially selective due to the relatively small research window, survey weariness, reluctance to disclose difficulties regarding health communication.

## Introduction



1  
2  
3 Healthcare is facing enormous challenges. Care is shifting towards managing rather than curing  
4 diseases due to the aging of the population and the rising prevalence of chronic diseases and multi-  
5 morbidity. As a result, doctor-patient interactions are transforming into partnerships in which  
6 patients' needs, values and beliefs influence the course of the care process <sup>1,2</sup>. Besides being  
7 responsive to patients' needs, the complexity of healthcare forces healthcare professionals to also  
8 take into account patients' health literacy (HL).  
9  
10

11 Health literacy is defined as one's 'knowledge, motivation and competences to access, understand,  
12 appraise, and apply health information in order to make judgments and take decisions in everyday  
13 life concerning healthcare, disease prevention and health promotion to maintain or improve quality  
14 of life during the life course' <sup>3</sup>. With the focus on patients managing their care, patients' knowledge,  
15 motivation, understanding and skills with regard to health information are important prerequisites to  
16 guarantee high quality care.  
17  
18  
19

20 Health literacy impacts on accessibility and utilization of care, doctor-patient communication, self-  
21 care, and, subsequently, health outcomes <sup>4-7</sup>. Research in eight European countries demonstrated  
22 that 47% of the population experience difficulties processing health-related information, hence, have  
23 problematic or inadequate health literacy <sup>8-14</sup>. Since the development of the conceptual framework  
24 of the HLS-EU consortium, health literacy research in Europe - and Belgium - is expanding.<sup>3</sup> In  
25 Belgium, the most renowned studies have focused on the prevalence, with 40% of the Belgian  
26 population being low health literate; on health literacy being an intermediary for tobacco use, health  
27 status, physical activity and the pricing of medication<sup>9</sup> and on the use of healthcare services and the  
28 associated costs.<sup>14</sup> This research of Vandenbosch et al<sup>14</sup> found no significant effect between  
29 someone's health literacy and the use of healthcare services such as the emergency room nor GP  
30 consultations. However, people with lower health literacy levels were found to have significantly  
31 more hospitalizations and more GP visits at home than those with adequate health literacy.<sup>14</sup>  
32  
33  
34  
35

36 Overall, people with limited health literacy may find it difficult to understand medication  
37 instructions, have poorer medication adherence <sup>7,10,15,16</sup>, use preventive services less <sup>7,17</sup>, have low  
38 self-efficacy <sup>18-20</sup>, struggle with self-managing chronic diseases <sup>7</sup> and have a worse health status than  
39 those with adequate health literacy <sup>7,21</sup>. Most at risk are non-native speakers, the elderly, and those  
40 with limited education <sup>10,13,22,23</sup>. To ensure patients receive appropriate care, healthcare professionals  
41 should make sure patients are (being) informed, have sufficient understanding, are given the  
42 opportunity to discuss treatment options and are involved in decision making <sup>2</sup>.  
43  
44  
45

46 Awareness of people's understanding of health information and their ability - and willingness - to be  
47 involved in (decisions about) their care is essential to tailor information and guide patients through  
48 the health care system <sup>24,25</sup>. General practitioners (GPs) in particular are well-placed to ensure people  
49 receive the care that meets patients' needs. By communicating effectively and facilitating patients'  
50 involvement in their care process, GPs may contribute to improving health outcomes<sup>4,7,24</sup>. However,  
51 this requires GPs to be able to identify patients with limited health literacy.  
52  
53  
54

55 To date, there are few studies investigating health care professionals' abilities to identify people with  
56 limited health literacy are scarce. Moreover, the Northern American studies that exist, demonstrated  
57 health care professionals' inability to identify people with limited health literacy and predominantly  
58 overestimating health literacy<sup>26-28</sup>. To assess health literacy, these studies relied on so called  
59 "objective" (health) literacy tools (NVS<sup>29</sup>, REALM<sup>30,31</sup>, REALM-R<sup>32</sup>). Their sample sizes were relatively  
60

1  
2  
3 small, with the number of participants ranging from 65 to 182. Despite these differences in study  
4 design, non-academic primary care physicians, residents, and nurses all overestimated patients'  
5 health literacy. They estimated health literacy at the highest level for respectively 74 out of 100  
6 patients; 164 out of 182 patients; 44 of 65 patients. The corresponding Kappa's (0.19 and 0.09)  
7 demonstrated the little agreement between healthcare professionals' estimations and patients'  
8 actual health literacy.  
9  
10

11 The aim of this research was to explore the agreement between patients' health literacy and GPs'  
12 health literacy estimations and examine characteristics impacting on health literacy (dis)agreement.  
13  
14

## 15 **Methods**

### 16 **Study design**

17 Cross-sectional study with paper based questionnaires (patient and GPs).  
18  
19

### 20 **Recruitment**

21 To recruit GPs, the researcher (HS) contacted 79 GPs working in two Belgian provinces of interest  
22 (Vlaams-Brabant and Limburg) (Fig. 1). Five GPs were in the direct network of the research team and  
23 immediately agreed to participate. Additionally, 73 out of 122 GPs responsible for organizing regional  
24 quality meetings for their peers were contacted through phone calls and email, resulting in 19 invites  
25 for the researcher to attend these GPs' regional quality meeting. During these meetings, GPs were  
26 informed about the health literacy conceptual framework, the purpose and study design of this  
27 research. Ultimately, 95 GPs expressed their intent to participate (with number of GPs participating  
28 varying per general practice). Seven of those GPs declined to participate before the research was set  
29 up in their practice. Of the remaining GPs, three were unable to carry out the research; four GPs  
30 returned zero questionnaires returned, whereas three others returned between one and three  
31 questionnaires. For one GP, no questionnaires were returned due to the loss of completed  
32 questionnaires (Fig 1). Recruitment and start-up took place between October 2016 and December  
33 2017.  
34  
35  
36  
37  
38  
39

### 40 **Sample size**

41 This study used purposive sampling for the recruitment of GPs and patients. It was aimed to reach  
42 2000 patients. Compared to the general population of the Dutch-speaking part of Belgium, women  
43 and people aged 65 years and older were over-represented ,with 63% women (compared to 51% in  
44 adult population of Dutch-speaking region), and 31% people aged 65 years and older (compared to  
45 25% in adult population of Dutch-speaking region).  
46  
47  
48

### 49 **Setting and participants**

50 In each general practice, the research window was set to be minimal one month. Participation (GPs  
51 and patients) was voluntary, written informed consent from the latter was obtained prior to medical  
52 consultation. Men and women 18 years of age and older consulting with a participating GP were  
53 eligible for inclusion. Patients were excluded when having a severe cognitive impairment, sensory  
54 disability, psychological or psychiatric disorder. This exclusion was documented by the participating  
55 GP.  
56  
57  
58  
59

### 60 **Measures**

4

### **Health literacy**

Health literacy of patients was assessed with HLS-EU-Q16. Derived from the 47-item European Health Literacy Survey Questionnaire (HLS-EU-Q47<sup>3</sup>), this 16-item version measures 11 of 12 sub-dimensions of health literacy as defined by the conceptual model developed by the HLS-EU consortium.<sup>33</sup> These dimensions result from integrating three health relevant domains (health care, disease prevention, health promotion) and four competencies relevant for the processing of health information (access, understand, appraise, apply).<sup>33</sup> HLS-EU-Q16 highly correlates with the 47-item version, but it does not allow statements on the sub-dimensions of health literacy.<sup>33-35</sup> The Dutch HLS-EU-Q16 has been used in Belgium<sup>9</sup> and the Netherlands<sup>36,37</sup>.

Items are formulated as questions (“How easy would you say it is to find information on treatments of illnesses that concern you?”, “How easy would you say it is to understand your doctor’s or pharmacist’s instruction on how to take a prescribed medicine?”) Each question was rated on 4-point Likert scales (“very difficult”, “difficult”, “easy”, and “very easy”). These scores are dichotomized, by coding responses 0 = “(very) difficult” and 1 = “(very) easy”. After summing the answers, a score between 0 and 16 can be obtained. Consequently, patients were categorized as having *inadequate health literacy* (scoring 0-8 points), *problematic health literacy* (scoring 9-12 points), *adequate health literacy* (scoring 13–16 points).

As opposed to patients’ health literacy assessment, GPs’ estimations of their patients’ health literacy was restricted to indicating either inadequate; problematic; adequate health literacy on a simple scale. To this end, GPs were educated on the health literacy concept and the associated HLS-EU questionnaires, at least twice. Amongst others, GPs were informed about how categories of health literacy were determined, allowing them to scale their patients’ health literacy into one of the three categories.

Where a patient marked two adjacent Likert-scores, the lower (the one referring to experiencing difficulties) score was registered. Where a patient marked two Likert-scores within two points of each other, the middle value was registered (e.g. if 2 and 4 marked, 3 was registered).

### **Other variables**

Patients self-reported their sex (male; female), age (continuous) and educational attainment (no formal education; primary education; secondary education; higher education). GP-patient acquaintance was documented by GPs based on the number of years patients have been visiting their GP (< 1 year; 1 - 5 years; 6 - 10 years; > 10 years). GPs also indicated whether the consultation concerned a replacement for a colleague (yes; no).

GPs’ (sex (male; female), age and years graduated (both continuous) were registered independently from the patient survey.

### **Data collection**

Prior to participation, GPs were educated about health literacy. At that moment, the research in general and the GP survey in particular, were presented. Subsequently, GPs could agree to participate. When participating GPs received the study surveys, the concept health literacy was explained once again and instructions on how to fill out the GP survey were repeated. Boxes labeled with a participating GP’s name were set out in the waiting area. These boxes contained white envelope’s, with each one of them consisting of a consent form and a both a patient and a GP survey,

1  
2  
3 labeled with a unique number. Leaflets with pictogram instructions were distributed throughout the  
4 waiting area to inform patients about the research.  
5

6  
7 In the waiting room, prior to their consultation with a participating GP, patients would voluntarily  
8 choose to fill out the patient survey (patient characteristics and HLS-EU-Q16). During consultation,  
9 patients would give their GP the GP survey. Subsequently, at the end of a participating patient's  
10 medical consultation, GPs than registered patients' age, GP-patient acquaintance and their own  
11 health literacy estimation of that patient in the separate GP survey. Patient surveys were collected in  
12 separate envelope's than GP surveys. Not only to stimulate patients to answer truthfully but also to  
13 ensure GPs had no access to patients' responses.  
14  
15

### 16 17 **Statistical analyses**

18 Demographic data and health literacy (patients and estimations by GPs) were analyzed using  
19 descriptive statistics. Kappa statistics were calculated to measure agreement between patients'  
20 health literacy and GPs' estimations of these patients' health literacy.<sup>38</sup> Generalized linear logit  
21 model (with reference group: GPs' health literacy estimations being equal to patients' health literacy)  
22 was used to assess if patients' sex, age and education, GP-patient acquaintance and GPs' sex, age,  
23 years since graduation and them replacing for a colleague impacted under- or overestimation of  
24 health literacy by GPs (GPs' estimates of patients' health literacy being respectively lower and higher  
25 than patients' health literacy). Missing values on the initially considered variables were excluded  
26 from analyses. Finally, analysis on variables with significant results encompassed only three variables  
27 (patient's education, sex of GP and the number of years patients had been consulting their GP).  
28 Statistical significance was assessed as  $p < 0.05$ . Data were analyzed with R.<sup>39</sup>  
29  
30  
31  
32

### 33 34 **Ethical approval and consent**

35 This study was approved by the Ethical Committee of Hasselt University (CME2015/553). Prior to  
36 participation, participants received a full explanation of the purpose of the study, their rights as  
37 participants, anonymity and confidentiality of the data collected.  
38  
39

### 40 41 **Patient and public involvement**

42 Patients were not involved in this research. However, prior to this study, the design has been  
43 explained in the context of the feasibility testing of the Dutch HLS-EU-Q16. Consequently, some  
44 patients were invited to comment on the study design. Patients did not interpret results nor did they  
45 contribute to the writing of the manuscript.  
46  
47

### 48 49 **Results**

50 1835 surveys were filled out and returned. The number of participants reduced to 1469 (and 80 GPs  
51 across 41 general practices) due to the exclusion of questionnaires (because more than half of the  
52 questions of HLS-EU-Q16 were unanswered; data on health literacy were missing (from the part of  
53 GP and/or patient); less than four questionnaires were returned) (Fig. 2). For the majority of these  
54 questionnaires the exclusion was based on a missing health literacy estimation by the GP.  
55 Consequently, patients' health literacy of this excluded subset could not be included in this research,  
56 although available. Of these 148 patients, 26 (17.6%) had inadequate health literacy, 27 (18.2%)  
57  
58  
59  
60

1  
2  
3 problematic and 95 (64.2%) adequate health literacy. Characteristics of excluded patients can be  
4 found in the supplementary file.  
5

6 To analyse data using the generalized logit model, patients with missing values were excluded (14  
7 and 70 missing values for patient's gender and education; 14 for GP-patient acquaintance; 11 for GPs  
8 doing a replacement for a colleague ). Analyses were performed on the final dataset of 1375 patients  
9 (Table 1).  
10  
11

### 12 **Sample characteristics**

13 Patients were on average 54.6 years old (SD 16.4); 63.9% were female; 48.2% was highly educated  
14 (Table 1). Regarding GP-patient acquaintance, approximately 10% of the patients have been  
15 consulting their GP for less than one year, 45.1% for over than 10 years .  
16  
17

18 The mean age of GPs was 42.8 years old (SD 13.5); 53% GPs were female (N= 80).GPs were graduated  
19 on average 17.3 (SD 13.3) years ago and were working on average 14.3 (SD 13.4) years in their  
20 current practice, with a maximum of 48 years (Table 1). Fifteen GPs were working solo;; whereas the  
21 remaining GPs were working in group practices of three to seven GPs. Six practices were located in  
22 four different regions with high population density, ten practices were located in five multicultural  
23 regions.  
24  
25  
26

### 27 **Health Literacy agreement**

28 Patients' health literacy was adequate, problematic and inadequate in respectively 63.6% (n= 875),  
29 21.7% (n= 299) and 14.6% (n= 201) of 1375 patients, whereas GPs estimated patients' health literacy  
30 respectively 90.3% (n= 1241), 9.5% (n= 130), 0.3% (n= 4). (Fig. 3). For each health literacy level, this  
31 corresponds with an agreement of respectively 143%; 43% and 2% for patients with adequate,  
32 problematic, inadequate health literacy (Table 1). Based on these data, there was slight agreement  
33 between patients' health literacy and GPs' estimations thereof,  $\kappa = 0.033$  (95% CI, 0.00124 to  
34 0.0648),  $p < 0.05$ .  
35  
36  
37  
38

### 39 **Characteristics impacting on health literacy (dis)agreement**

40 Patient's education, sex of GP and the number of years a patient has been consulting with their GP  
41 were retained as these three variables were shown to significantly impact on GPs estimating health  
42 literacy of their patients to be lower (under-estimate) or higher (over-estimate) than patients' actual  
43 health literacy.  
44  
45  
46

#### 47 ***Patients' educational level***

48 Health literacy is more likely to be underestimated when a patient has no formal education (OR 5.58,  
49 95% CI: 1.60 to 19.50); primary education (OR 14.13, 95% CI: 6.54 to 30.54); secondary education(OR  
50 5.05, 95% CI: 2.65 to 9.61), compared to patients with higher education (Table 2). GPs are more likely  
51 to overestimate patients' health literacy in patients with primary education (OR 2.02, 95% CI: 1.22 to  
52 3.13); secondary education (OR 1.34, 95% CI: 1.04 to 1.73), compared to those with higher education  
53 (Table 2).  
54  
55

#### 56 ***Length of GP-patient acquaintance***

57 The odds of underestimating health literacy are higher for patients who have been seeing their GP  
58 for a relatively short time: health literacy is more likely underestimated in patients consulting with  
59  
60

1  
2  
3 their GP less than one year (OR 6.7, 95% CI: 1.10 to 3.70); between one and five years (OR 4.81, 95%  
4 CI: 2.79 to 16.09); between six and ten years (OR 3.70, 95% CI: 2.53 to 9.14) compared to patients  
5 who have been consulting with their GP for more than ten years (Table 2). Overestimation of health  
6 literacy is more likely in patients consulting with their GP between one and five years, compared to  
7 'more than ten years' (OR 1.51, 95% CI: 1.17 to 1.94) (Table 2).  
8  
9

### 10 ***Sex of GPs***

11 The odds of underestimating health literacy when a GP is male is 2.02 times the odds of making an  
12 underestimation when a GP is female (Table 2).  
13  
14  
15  
16  
17  
18  
19  
20  
21  
22  
23  
24  
25  
26  
27  
28  
29  
30  
31  
32  
33  
34  
35  
36  
37  
38  
39  
40  
41  
42  
43  
44  
45  
46  
47  
48  
49  
50  
51  
52  
53  
54  
55  
56  
57  
58  
59  
60

For peer review only

**Table 1 Patient and GP characteristics**

|                                                       | Overall sample | Generalized logit model | Patient's health literacy |             |             |
|-------------------------------------------------------|----------------|-------------------------|---------------------------|-------------|-------------|
|                                                       |                |                         | Inadequate                | Problematic | Adequate    |
| <b>Total N</b>                                        | 1469           | 1375                    | 201                       | 299         | 875         |
| <b>PATIENT</b>                                        | % (N)          | % (N)                   | % (N)                     | % (N)       | % (N)       |
| <b>Sex</b>                                            |                |                         |                           |             |             |
| female                                                | 63% (919)      | 63.9% (878)             | 60.7% (122)               | 63.2% (189) | 64.8% (567) |
| Missing values                                        | 1% (14)        | 0% (0)                  | 0% (0)                    | 0% (0)      | 0% (0)      |
| <b>Age</b>                                            |                |                         |                           |             |             |
| 18y-24y                                               | 4% (57)        | 3.9% (54)               | 5.5% (11)                 | 5.0% (15)   | 3.2% (28)   |
| 25y-34y                                               | 11% (154)      | 10.4% (143)             | 12.4% (25)                | 12.7% (38)  | 9.1% (80)   |
| 35y-44y                                               | 13% (192)      | 13.2% (182)             | 12.9% (26)                | 13.4% (40)  | 13.3% (116) |
| 45y-54y                                               | 20% (294)      | 20.2% (278)             | 13.4% (27)                | 14.0% (42)  | 23.9% (209) |
| 55y-64y                                               | 21% (311)      | 21.5% (296)             | 25.4% (51)                | 19.7% (59)  | 21.3% (186) |
| 65y-74y                                               | 19% (283)      | 19.3% (265)             | 18.4% (37)                | 22.1% (66)  | 18.5% (162) |
| 75y-84y                                               | 10% (153)      | 9.7% (134)              | 9.0% (18)                 | 11.4% (34)  | 9.4% (82)   |
| 85y-104y                                              | 2% (25)        | 1.7% (23)               | 3.0% (6)                  | 1.7% (5)    | 1.4% (12)   |
| mean age (SD)                                         | 54.8 (16.5)    | 54.6 (16.4)             | 54.1 (17.4)               | 54.7 (17.7) | 54.7 (15.7) |
| Missing values                                        | 0% (0)         | 0% (0)                  | 0% (0)                    | 0% (0)      | 0% (0)      |
| <b>Educational attainment</b>                         |                |                         |                           |             |             |
| no formal education                                   | 3.9% (54)      | 3.9% (54)               | 7.0% (14)                 | 5.0% (15)   | 2.9% (25)   |
| primary education                                     | 7.6% (107)     | 7.6% (104)              | 11.9% (24)                | 8.0% (24)   | 6.4% (56)   |
| secondary education                                   | 40.2% (563)    | 40.3% (554)             | 42.8% (86)                | 42.5% (127) | 39.0% (341) |
| higher education                                      | 48.2% (675)    | 48.2% (663)             | 38.3% (77)                | 44.5% (133) | 51.8% (453) |
| Missing values                                        | 5% (70)        | 0% (0)                  | 0% (0)                    | 0% (0)      | 0% (0)      |
| <b>Number of years patients have been visiting GP</b> |                |                         |                           |             |             |
| < 1y                                                  | 9.8% (143)     | 9.5% (130)              | 11.9% (24)                | 9.0% (27)   | 9.0% (79)   |



|                |             |             |            |             |             |
|----------------|-------------|-------------|------------|-------------|-------------|
| 1y - 5y        | 29.9% (435) | 30.0% (412) | 30.3% (61) | 34.8% (104) | 28.2% (247) |
| 6y - 10y       | 15.4% (225) | 15.5% (213) | 14.4% (29) | 14.0% (42)  | 16.2% (142) |
| > 10y          | 44.8% (652) | 45.1% (620) | 43.3% (87) | 42.1% (126) | 46.5% (407) |
| Missing values | 1% (14)     | 0% (0)      | 0% (0)     | 0% (0)      | 0% (0)      |

**Table 1 Patient and GP characteristics (continued)**

|                                   | Overall sample | Generalized logit model | Patient's health literacy |                |             |
|-----------------------------------|----------------|-------------------------|---------------------------|----------------|-------------|
|                                   |                |                         | Inadequate HL             | Problematic HL | Adequate HL |
| <b>Total N</b>                    | 1469           | 1375                    | 201                       | 299            | 875         |
| <b>GENERAL PRACTITIONER</b>       | % (N)          | % (N)                   | % (N)                     | % (N)          | % (N)       |
| <b>Sex</b>                        |                |                         |                           |                |             |
| female                            | 51.1% (750)    | 51.4% (668)             | 47.3% (95)                | 50.5% (151)    | 52.7% (461) |
| Missing values                    | 0% (0)         | 0% (0)                  | 0% (0)                    | 0% (0)         | 0% (0)      |
| <b>Age</b>                        |                |                         |                           |                |             |
| 25y-34y                           | 28.9% (425)    | 28.5% (392)             | 29.4% (59)                | 31.1% (93)     | 27.4% (240) |
| 35y-44y                           | 19.5% (287)    | 20.0% (275)             | 18.9% (38)                | 19.7% (59)     | 20.3% (178) |
| 45y-54y                           | 25.1% (368)    | 25.2% (346)             | 21.9% (44)                | 24.7% (74)     | 26.1% (228) |
| 55y-64y                           | 20.8% (305)    | 20.4% (281)             | 20.4% (41)                | 19.4% (58)     | 20.8% (182) |
| 65y-74y                           | 5.7% (84)      | 5.9% (81)               | 9.5% (19)                 | 5.0% (15)      | 5.4% (47)   |
| 75y-84y                           | 0% (0)         | 0% (0)                  | 0% (0)                    | 0% (0)         | 0% (0)      |
| <b>Doing a replacement</b>        |                |                         |                           |                |             |
| yes                               | 5.6% (82)      | 5.4% (74)               | 9.0% (18)                 | 3.7% (11)      | 5.1% (45)   |
| Missing values                    | 0.7% (11)      | 0% (0)                  | 0% (0)                    | 0% (0)         | 0% (0)      |
| <b>Health literacy estimation</b> |                |                         |                           |                |             |



1  
2  
3  
4  
5  
6  
7  
8  
9  
10  
11  
12  
13  
14  
15  
16  
17  
18  
19  
20  
21  
22  
23  
24  
25  
26  
27  
28  
29  
30  
31  
32  
33  
34  
35  
36  
37  
38  
39  
40  
41  
42  
43  
44  
45  
46

|                                                                           |              |              |                           |                          |                          |
|---------------------------------------------------------------------------|--------------|--------------|---------------------------|--------------------------|--------------------------|
| inadequate                                                                | 0.3% (5)     | 0.3% (4)     | 1.0% (2) <sup>○</sup>     | 0% (0) <sup>▽</sup>      | 0.2% (2) <sup>▽▽</sup>   |
| problematic                                                               | 9.5% (139)   | 9.5% (130)   | 17.9% (36) <sup>△</sup>   | 9.4% (28) <sup>○</sup>   | 7.5% (66) <sup>▽</sup>   |
| adequate                                                                  | 90.2% (1325) | 90.3% (1241) | 81.1% (163) <sup>△△</sup> | 90.6% (271) <sup>△</sup> | 92.2% (807) <sup>○</sup> |
| <b>Agreement patients' health literacy &amp; GPs' estimations thereof</b> |              |              |                           |                          |                          |
| over-estimation                                                           | 34.6% (508)  | 34% (470)    | 99% (199)                 | 91% (271)                | N/A                      |
| equal estimation                                                          | 60.7% (891)  | 61% (837)    | 1% (2)                    | 9% (28)                  | 92% (807)                |
| under-estimation                                                          | 4.7% (70)    | 5% (68)      | N/A                       | 0% (0)                   | 8% (68)                  |
| <b>Total N</b>                                                            | <b>1469</b>  | <b>1375</b>  | <b>201</b>                | <b>299</b>               | <b>875</b>               |

GPs estimate health literacy equal to <sup>○</sup>/one level lower <sup>▽</sup>/one level higher <sup>△</sup> or two levels lower <sup>▽▽</sup>/ two levels higher <sup>△△</sup>/than patients' actual health literacy

For peer review only

**Table 2 Odds ratios and 95% confidence intervals for patient and GP characteristics impacting GPs' estimations of patients' health literacy (p < 0.05)**

|                                             |                     | GP's estimation of patient's health literacy* | Odds Ratio | 95% confidence interval |
|---------------------------------------------|---------------------|-----------------------------------------------|------------|-------------------------|
| <b>Patient education</b> <sup>a</sup>       | no formal education | under-estimation**                            | 5.58       | 1.60 to 19.50           |
|                                             |                     | over-estimation***                            | 14.13      | 6.54 to 30.54           |
|                                             | primary education   | under-estimation                              | 2.02       | 1.22 to 3.13            |
|                                             |                     | over-estimation***                            | 5.05       | 2.65 to 9.61            |
|                                             | secondary education | under-estimation                              | 1.34       | 1.04 to 1.73            |
|                                             |                     | over-estimation                               | 6.7        | 1.10 to 3.70            |
| <b>GP-patient acquaintance</b> <sup>b</sup> | <1 year             | under-estimation                              | 4.81       | 2.79 to 16.09           |
|                                             |                     | over-estimation                               | 1.51       | 1.17 to 1.94            |
|                                             | 1 - 5 years         | under-estimation                              | 3.70       | 2.53 to 9.14            |
|                                             |                     | over-estimation                               | 2.02       | 1.69 to 8.09            |
| <b>GPs' sex</b> <sup>c</sup>                | male                | under-estimation                              |            |                         |
|                                             |                     | over-estimation                               |            |                         |

<sup>a</sup> compared to patients with higher education<sup>b</sup> compared to patients having been consulting their GP for over 10 years<sup>c</sup> compared to female GP

\* Reference group: GPs' estimation of a patient's health literacy = patient's health literacy

\*\* health literacy under-estimation: GPs' estimation of a patient's health literacy &lt; patient's health literacy

\*\*\* health literacy over-estimation: GPs' estimation of a patient's health literacy &gt; patient's health literacy

## Discussion

Our findings demonstrate GPs' predominantly estimate patients' health literacy to be adequate. Discordance between patients' actual health literacy and what GPs estimate it to be results in estimation of health literacy to be higher, whereas for others, GPs estimate it to be lower than patients' actual health literacy. These respectively over- and underestimations of health literacy are significantly affected by patients' level of education and the length of patients' relationship with their GP and the sex of the GP. Health literacy is more likely to be over- or underestimated with decreasing educational level, compared to higher education. The likelihood to over- or underestimate health literacy is also higher in patients who have been consulting their GP a relatively short period of time (less than ten years), compared to patients who have been consulting their GP for over ten years.

### Comparison with previous studies

The majority of GPs perceived their patients to have adequate health literacy, although 10% of patients' had inadequate health literacy.<sup>9,12</sup> This corresponds to previous research in a hospital setting demonstrating doctors' health literacy overestimation outnumbering underestimation with nearly 2-to-1<sup>26</sup>. A similar outcome was reported, focusing on nurses.<sup>28</sup> Only one study described primary care physicians overestimating patients literacy.<sup>27</sup>

### Education

GPs seem to seek guidance in patients' educational level when estimating health literacy, although we are not sure patients ever explicitly disclosed their educational level to GP. Numerous studies have demonstrated the correlation between health literacy and education<sup>9,22,23</sup>: lower health literacy is observed in people with lower educational levels, although highly educated people may also have poor health literacy<sup>12,23</sup>. Despite of its correlation with health literacy, there's a fundamental difference between literacy and health literacy, which is emphasized in several studies.<sup>9,12,23</sup> Undoubtedly, literacy is a vital skill to function with or within the contemporary health care system. However, complementary, advanced skills are necessary to execute instructions, interact with healthcare professionals and critically appraise information.<sup>20,40,41</sup> Our findings particularly indicate that for patients with primary education there is an increased likelihood for GPs to over-but also to under-estimate their health literacy.

### GP – patient acquaintance

That a long standing doctor-patient relationships would contribute to GPs' having a better understanding of their 'long-term' patients, for instance, knowing their background, social network,... is what we would have expected. The results presented in this study indicate that this also translates in the estimations GP make about their patients' health literacy. For patients who have been consulting their GP for ten years or less, chances are in particularly higher that GPs underestimate their health literacy of patients, with the highest odds in patients visiting their GP less than a year, which could indicate a cautious approach due to GPs and patients being less acquainted, compared to those who have been consulting with their GP for more than ten years. Overestimation of health literacy, on the other hand, was only found in patients seeing their GP between one and five years.

To explain our findings, we turned to studies focusing on continuity of care, as a key dimension of good primary care.<sup>42</sup> We consider GP-patient acquaintance, as described in this research, to be analogous to what is referred to as continuity of care and a long relationship in previous studies.

1  
2  
3 Findings presented in these studies than support our results, as it is reported to correlate with  
4 improved adherence to physicians' instructions<sup>43</sup> and better communication<sup>44</sup>. Moreover, being  
5 cared for less than one year by the same care provider was associated with decreasing  
6 communication excellence. <sup>45</sup> Although (dis)satisfaction with communication may stem from being  
7 unaware of patients' health literacy, we did not find studies linking their results to patients'  
8 knowledge, their understanding of or the processing of health information.  
9  
10

### 11 **Implications & recommendations for clinical practice**

12  
13 GPs in our research were often not able to estimate health literacy of their patients. We would  
14 recommend GPs to perform some sort of health literacy assessment, instead of going by intuition.  
15 Therefore, feasible alternatives for clinical practice should be considered <sup>29</sup>, such as using single item  
16 questions <sup>28,46</sup>, or prompt lists<sup>47</sup> preferably tested by the target group to avoid comprehension  
17 problems <sup>48-50</sup>, but, above all, by supporting patients to understand information. Besides asking  
18 patients directly about their understanding and the kind of information and/or (practical) support  
19 they might need, patients should be provided tools to ensure they understand but can also recall  
20 what has been said<sup>16,51</sup>. Two examples worth mentioning are the Ask me 3 questions<sup>52</sup> campaign or  
21 the use of the teach-back method<sup>53</sup>. The former is designed to help patients receive appropriate  
22 information on: "What is my main problem?"; "What do I need to do (about the problem)?"; "Why is it  
23 important for me to do this?". The latter refers to a method that consists of asking patients to repeat  
24 back what was just said (instructions, next steps to be taken). Based on their answers, it will be clear  
25 when there is a need for clarification. Moreover, educating (future) GPs and making them familiar  
26 with the health literacy concept and the implications of low health literacy is a prerequisite to  
27 address health literacy <sup>54</sup>. GPs should get to know their patients. In particular it is important to know  
28 who is experiencing barriers to care and how to reach them. Being able to identify people with  
29 limited health literacy will help GPs to tackle health inequalities, for example by adequate  
30 information exchange. Hence, GPs should be equipped with a variety of strategies they can integrate  
31 in their day-to-day practice to communicate on a low health literacy level <sup>54-56</sup>.  
32  
33  
34  
35  
36  
37  
38

### 39 **Strengths and limitations**

40  
41 GP participation was potentially selective, although several attempts to contact and motivate GPs  
42 were undertaken. Given, selection bias may have occurred in the relatively small research window.  
43 Some patients might not have had the chance to participate because of not visiting their GP, some  
44 patients may have felt reluctant <sup>57</sup> or ashamed to disclose health literacy information <sup>49,58,59</sup>. Also, the  
45 voluntariness of patients participating impacted on the study sample. This not only resulted in a small  
46 fraction of GPs presumable patient population to take part in the research – the number of patients  
47 per GP was below 30, whereas we would expect a GP's patient population to be around 1000  
48 patients-; it is likely, for some patients (for instance, literate patients) participation would be more  
49 easy, hence, would be more eager to participate than others. Survey weariness, the length or  
50 usability of a paper-based questionnaire may have discouraged patients from participating,  
51 particularly more vulnerable patients (illiterate, non-natives). Nevertheless, many patients with low  
52 health literacy and low education participated. People experiencing barriers to care might have been  
53 missed. If so, their participation would have enriched data if the reason for not visiting their GP or for  
54 not participating would be linked to health literacy, for example because of low trust in GPs or poor  
55 self-related health <sup>60</sup>. Some GPs had the impression the majority of participating patients had a  
56 profile not reflecting the diversity of their patient population. Patients were felt to be Dutch-  
57  
58  
59  
60

1  
2  
3 speaking, illiterate and/or involved, empowered patients, predominantly without migration  
4 background (except for those general practices in the multicultural regions; thus,. This limitation also  
5 makes our findings more powerful. If incorrect health literacy estimations imply that GPs assume  
6 these particular patients to adequately function in a healthcare setting, this would make those  
7 patients more vulnerable to not accessing appropriate care. After all, if participating patients did not  
8 represent minority groups or patients experiencing some vulnerability, GPs' relatively high scores on  
9 patients' health literacy, would indicate GPs are lacking awareness of "un-obvious" patients to be at  
10 risk of experiencing difficulties with health-related information. It would be interesting to examine  
11 how a more diverse sample - patients who are illiterate, with limited Dutch proficiency, with different  
12 backgrounds, with certain comorbidities, but also patients GPs visited at home<sup>14</sup> and not in their  
13 practice - would impact results.  
14  
15

16  
17  
18 This research relies on HLS-EU-Q16 to measure comprehensive health literacy. As opposed to the  
19 original 47-item version, this 16-item version was developed for quicker assessment of health  
20 literacy. However, assessment with HLS-EU-Q16 does not allow statements on a health literacy sub-  
21 dimension. The output of these 16 items, covering only 11 of the 12 dimensions, is an overall health  
22 literacy score<sup>3</sup>. Hence, GPs were required to give an overall health literacy score as well, instead of  
23 them being able to score a particular sub-dimension. For GPs, patients and researchers future  
24 research could aim to assess certain sub-dimensions and GPs' predictions being in (dis)agreement  
25 with a patient's health literacy sub-dimension. In this study, however, HLS-EU-Q16 was purposively  
26 chosen to allow easy assessment of health literacy in general population.  
27  
28  
29

30 Responses on the HLS-EU-Q16 are prone to subjectivity because patients' - self-perceived - health  
31 literacy is assessed<sup>61</sup>, whereas tools, designed to examine people succeeding in specific problem-  
32 solving tasks are regarded as (measuring) more "objective" health literacy.<sup>61</sup> Nonetheless, self-  
33 reported questions are considered valid and feasible methods to assess health literacy<sup>62-64</sup>. Both  
34 self-perceived and objective health literacy measurements benefit of being tailored to targeted  
35 groups. Unless it's part of the design, tools relying on vocabulary unfamiliar to the target group,  
36 consisting of terms they do not come across in everyday live, enhances the difficulty of a particular  
37 tool. Consequently, the output will reflect someone's ability to understand the tool itself (its design,  
38 the questions, answer options,..), rather than one's health literacy<sup>49</sup>. Mindful of potential  
39 comprehension problems, feasibility of HLS-EU-Q16's was tested prior to this study<sup>48</sup>. In  
40 correspondence with other studies, the level of abstraction or lacking experience regarding some  
41 health-related tasks in health care, health promotion and disease prevention made it difficult to  
42 answer some items, but overall HLS-EU-Q16 was considered a feasible instrument<sup>48,49</sup>.  
43  
44  
45  
46  
47

48 Finally, almost 10% of participants were excluded from final analyses due to missing data on health  
49 literacy. However, looking into detail, 148 data were excluded solely because they lacked GPs' health  
50 literacy estimations, not because patients' health literacy not be assessed. Excluded data often  
51 originated from GP surveys that were returned blank or incomplete. Possible explanations are that  
52 GPs did not receive a GP survey from their patients; or GPs on their part might have been lacking  
53 time.  
54  
55

## 56 Conclusion

57 Intuitively assessing patients' health literacy is difficult. Both patients' education and GP-patient  
58 acquaintance as well as the sex of the GP impact on the estimations GPs make regarding patients'  
59  
60

1  
2  
3 health literacy. With decreasing educational levels, the likelihood to incorrectly estimate patients'  
4 health literacy increases, suggesting patients' education is not a good indicator for their health  
5 literacy. Consequently, GPs should be aware of health literacy and it being different from 'literacy'  
6 (i.e. education). It would be beneficial to facilitate and encourage GPs to get a profound  
7 understanding of their patients and their lives. A long standing relationship between GP and patient  
8 seem to contribute to getting to know patients as GPs are better at predicting health literacy of  
9 patients who they have been consulting with for more than ten years. With health care being  
10 redesigned to be more integrated, there's an opportunity to promote in-depth communication as the  
11 cornerstone for everyone to access adequate care. To be incorporated in daily practice, GPs should  
12 be allowed to invest a sufficient amount of time on getting to know their patients.  
13  
14  
15

## 16 **Acknowledgements**

17  
18 We thank GPs, their support staff and patients at all general practices, without whom this study  
19 would not have been possible. We greatly appreciate the support and the contribution of the  
20 consultants of I-BioStat, Center for Statistics, UHasselt. Last but not least, a special thanks to those  
21 helping out with the logistics.  
22  
23  
24

## 25 **Contributors**

26  
27 HS was responsible for study concept and design (with valuable input from BA and NC) and for data  
28 acquisition and for initial analyses. Data interpretation with all authors (HS, BA, FV, NC) led to a  
29 manuscript drafted by HS. All authors substantially contributed to critically reviewing the manuscript  
30 and all read and approved the final version. All authors had full access to all of the study data and  
31 take responsibility for the integrity of the data and the accuracy of the data. The corresponding  
32 author attests that all listed authors meet authorship criteria and that no others meeting the criteria  
33 have been omitted.  
34  
35  
36

## 37 **Funding**

38  
39 This research received no specific grant from any funding agency in the public, commercial or not-  
40 for-profit sectors.  
41  
42

## 43 **Competing interests**

44  
45 All authors have completed the ICMJE uniform disclosure form  
46 at [www.icmje.org/coi\\_disclosure.pdf](http://www.icmje.org/coi_disclosure.pdf) and declare: no support from any organisation for the  
47 submitted work; no financial relationships with any organisations that might have an interest in the  
48 submitted work in the previous three years; no other relationships or activities that could appear to  
49 have influenced the submitted work.  
50  
51

## 52 **Ethical approval**

53  
54 This study was approved by the Ethical Committee of Hasselt University (CME2015/553). Prior to  
55 participation, participants received a full explanation of the purpose of the study, their rights as  
56 participants, anonymity and confidentiality of collected data.  
57  
58

## 59 **Transparency**

1  
2  
3 The lead author affirms that this manuscript is an honest, accurate, and transparent account of the  
4 study being reported; that no important aspects of the study have been omitted; and that any  
5 discrepancies from the study as planned (and if relevant registered) have been explained.  
6  
7

## 8 **Data sharing**

9  
10 The dataset used and/or analyzed during the current study are available from the corresponding  
11 author upon reasonable request.  
12

## 13 **Figure legends**

14  
15 Fig. 1 Recruitment of general practitioners  
16

17  
18 Fig. 2 Flow diagram excluded questionnaires  
19

20  
21 Fig. 3 GPs' health literacy estimations and patients' health literacy (n= 1375)  
22  
23  
24  
25  
26  
27  
28  
29  
30  
31  
32  
33  
34  
35  
36  
37  
38  
39  
40  
41  
42  
43  
44  
45  
46  
47  
48  
49  
50  
51  
52  
53  
54  
55  
56  
57  
58  
59  
60

## References

1. Epstein R., Kevin F, Cara S., Kurt C. Why the Nation Needs a Policy Push on Patient-centred Care. *Health Aff.* 2010;29(8):1489–95.
2. Epstein RM, Street RL. The Values and Value of Patient-Centered Care. *Ann Fam Med.* 2011;9(2):100–3.
3. Sørensen K, Van den Broucke S, Fullam J, Doyle G, Pelikan J, Slonska Z, et al. Health literacy and public health: a systematic review and integration of definitions and models. *BMC Public Health.* 2012;12(1):80.
4. Stewart MA. Effective physician-patient communication and health outcomes: a review. *CMAJ.* 1995;152(9):1423–33.
5. Lindau ST, Tomori C, Lyons T, Langseth L, Bennett CL, Garcia P. The association of health literacy with cervical cancer prevention knowledge and health behaviors in a multiethnic cohort of women. *Am J Obstet Gynecol.* 2002;186(5):938–43.
6. Paasche-Orlow MK, Wolf MS. The Causal Pathways Linking Health Literacy to Health Outcomes. *Am J Health Behav.* 2007;31(1):19–26.
7. Berkman ND, Sheridan SL, Donahue KE, Halpern DJ, Crotty K. Low Health Literacy and Health Outcomes: An Updated Systematic Review. *Ann Intern Med.* 2011;155(2):97.
8. Vancorenland S, Avalosse H, Verniest R, Callens M, Van den Broucke S, Renwart A, et al. Bilan des connaissances des Belges en matière de santé. *MC-Information.* 2014;258:48–55.
9. Van den Broucke S, Renwart A. La littératie en santé en Belgique: un médiateur des inégalités sociales et des comportements de santé. Université Catholique de Louvain. 2014. 22 p.
10. Institute of Medicine. *Health Literacy: A Prescription to End Confusion.* Washington, D.C.: National Academies Press; 2004. 366 p.
11. Kirsch IS, Jungeblut A, Jenkins L, Kolstad A. *Adult literacy in America: A first look at the results of the National Adult Literacy Survey.* Office of Educational Research and Improvement, U.S. Dept. of Education. Washington, D.C.; 1993. 178 p.
12. Kickbush I, Pelikan JM, Apfel F, Tsouros A. *Health Literacy: The solid facts.* World Health Organisation (WHO): Regional Office for Europe. Copenhagen; 2013.
13. Sørensen K, Pelikan JM, Röthlin F, Ganahl K, Slonska Z, Doyle G, et al. Health literacy in Europe: comparative results of the European health literacy survey (HLS-EU). *Eur J Public Health.* 2015;25(6):1053–8.
14. Vandebosch J, Van den Broucke S, Vancorenland S, Avalosse H, Verniest R, Callens M. Health literacy and the use of healthcare services in Belgium. *J Epidemiol Community Health.* 2016;70(10):1032–8.
15. Shrank WH, Avorn J. Educating Patients About Their Medications: The Potential And Limitations Of Written Drug Information. *Health Aff.* 2007;26(3):731–40.
16. Brooks C, Ballinger C, Mander C, Adams J, Nutbeam D, Mander C, et al. Nursing and allied health professionals' views about using health literacy screening tools and a universal precautions approach to communication with older adults: a qualitative study. *Disabil Rehabil.* 2019;0(0):1–7.



17. Miller DP, Brownlee CD, McCoy TP, Pignone MP. The effect of health literacy on knowledge and receipt of colorectal cancer screening: a survey study. *BMC Fam Pract*. 2007;8(1):16.
18. Baker DW, Parker RM, Williams M V., Pitkin K, Parikh NS, Coates W, et al. The Health Care Experience of Patients with Low Literacy. *Arch Fam Med*. 1996;5(6):329–34.
19. Sarkar U, Fisher L, Schillinger D. Is self-efficacy associated with diabetes self-management across race/ethnicity and health literacy? *Diabetes Care*. 2006;29(4):823–9.
20. Nutbeam D. Health literacy as a public health goal: a challenge for contemporary health education and communication strategies into the 21st century. *Health Promot Int*. 2000;15(3):259–67.
21. Baker DW. Health Literacy and Mortality Among Elderly Persons. *Arch Intern Med*. 2007;167(14):1503.
22. van der Heide I, Rademakers J, Schipper M, Droomers M, Sørensen K, Uiters E. Health literacy of Dutch adults: a cross sectional survey. *BMC Public Health*. 2013;13:179.
23. van der Heide I, Wang J, Droomers M, Spreeuwenberg P, Rademakers J, Uiters E. The Relationship Between Health, Education, and Health Literacy: Results From the Dutch Adult Literacy and Life Skills Survey. *J Health Commun*. 2013;18(sup1):172–84.
24. Schillinger D, Piette J, Grumbach K, Wang F, Wilson C, Daher C, et al. Closing the loop: Physician Communication with Diabetic Patients Who Have Low Health Literacy. *Arch Intern Med*. 2003;163:83–90.
25. Bergeson SC, Dean JD. A Systems Approach to Patient-Centered Care. *JAMA*. 2006;296(23):2848.
26. Bass PF, Wilson JF, Griffith CH, Barnett DR. Residents' ability to identify patients with poor literacy skills. *Acad Med*. 2002;77(10):1039–41.
27. Kelly PA, Haidet P. Physician overestimation of patient literacy: A potential source of health care disparities. *Patient Educ Couns*. 2007;66(1):119–22.
28. Dickens C, Lambert BL, Cromwell T, Piano MR. Nurse Overestimation of Patients' Health Literacy. *J Health Commun*. 2013;18(sup1):62–9.
29. Weiss BD. Quick Assessment of Literacy in Primary Care: The Newest Vital Sign. *Ann Fam Med*. 2005;3(6):514–22.
30. Davis T, Long S, Jackson R, Mayeaux E, George R, Murphy P, et al. Rapid estimate of adult literacy in medicine: a shortened screening instrument. *Fam Med*. 1993;25:391–5.
31. Davis TC, Gazmararian J, Kennen EM. Approaches to Improving Health Literacy : Lessons From the Field. *Joural Heal Commun*. 2006;11:551–4.
32. Bass PF, Wilson JF, Griffith CH. A shortened instrument for literacy screening. *J Gen Intern Med* [Internet]. 2003 Dec;18(12):1036–8. Available from: <http://link.springer.com/10.1111/j.1525-1497.2003.10651.x>
33. Pelikan JM, Röthlin F, Ganahl K, Peer S. Measuring comprehensive health literacy in general populations - the HLS-EU instruments. In: *The Second International Conference of Health Literacy and Health Promotion, Taipei, Taiwan, 6-8 10 2014*. 2014.

- 1  
2  
3 34. Röthlin F, Pelikan J, Ganahl K. Die Gesundheitskompetenz Jugendlichen in Österreich. 2013.  
4  
5 35. HLS-EU-Consortium. HLS-EU-Q Measurement of Health Literacy in Europe: HLS-EU-Q47; HLS-  
6 EU-Q16; and HLS-EU-Q86. Exec Agency Heal Consum. 2012;1–14.  
7  
8 36. Pander Maat H, Essink-Bot M-L, Leenaars KE, Fransen MP. A short assessment of health  
9 literacy (SAHL) in the Netherlands. *BMC Public Health* [Internet]. 2014;14(1):990. Available  
10 from: <http://www.biomedcentral.com/1471-2458/14/990>  
11  
12 37. Fransen MP, Leenaars KEF, Rowlands G, Weiss BD, Maat HP, Essink-Bot M-L. International  
13 application of health literacy measures: Adaptation and validation of the newest vital sign in  
14 The Netherlands. *Patient Educ Couns* [Internet]. 2014;97(3):403–9. Available from:  
15 <http://linkinghub.elsevier.com/retrieve/pii/S0738399114003668>  
16  
17 38. Cohen J. A Coefficient of Agreement for Nominal Scales. *Educ Psychol Meas*. 1960;20(1):37–  
18 46.  
19  
20 39. R Development Core Team. R: A Language and Environment for Statistical Computing  
21 [Internet]. Vienna, Austria: R Foundation for Statistical Computing; 2008. Available from:  
22 <http://www.r-project.org/>  
23  
24 40. Heijmans M, Waverijn G, Rademakers J, van der Vaart R, Rijken M. Functional, communicative  
25 and critical health literacy of chronic disease patients and their importance for self-  
26 management. *Patient Educ Couns*. 2015;98(1):41–8.  
27  
28 41. van der Heide I, Heijmans M, Schuit AJ, Uiters E, Rademakers J. Functional, interactive and  
29 critical health literacy: Varying relationships with control over care and number of GP visits.  
30 *Patient Educ Couns*. 2015;98(8):998–1004.  
31  
32 42. Starfield B, Shi L, Macinko J. Contribution of primary care to health systems and health.  
33 *Milbank Q*. 2005;83(3):457–502.  
34  
35 43. Dietrich AJ, Marton KI. Does continuous care from a physician make a difference? *J Fam Pract*.  
36 1982;15(5):929–37.  
37  
38 44. Potter SJ, McKinlay JB. From a relationship to encounter: An examination of longitudinal and  
39 lateral dimensions in the doctor-patient relationship. *Soc Sci Med*. 2005;61(2):465–79.  
40  
41 45. Katz DA, McCoy K, Sarrazin MV. Does Improved Continuity of Primary Care Affect Clinician–  
42 Patient Communication in VA? *J Gen Intern Med*. 2014;29(S2):682–8.  
43  
44 46. Wallace LS, Cassada DC, Rogers ES, Freeman MB, Grandas OH, Stevens SL, et al. Can Screening  
45 Items Identify Surgery Patients at Risk of Limited Health Literacy? *J Surg Res*.  
46 2007;140(2):208–13.  
47  
48 47. Sansoni J, Grootemaat P, Duncan C, Samsa P, Eagar K. A Systematic Literature Review on  
49 Question Prompt Lists in Health Care (Final Report) [Internet]. 2014. Available from:  
50 [https://www.safetyandquality.gov.au/wp-content/uploads/2014/10/Question-Prompt-List-](https://www.safetyandquality.gov.au/wp-content/uploads/2014/10/Question-Prompt-List-Literature-Review.pdf)  
51 [Literature-Review.pdf](https://www.safetyandquality.gov.au/wp-content/uploads/2014/10/Question-Prompt-List-Literature-Review.pdf)  
52  
53 48. Storms H, Claes N, Aertgeerts B, Van Den Broucke S. Measuring health literacy among low  
54 literate people: an exploratory feasibility study with the HLS-EU questionnaire. *BMC Public*  
55 *Health*. 2017;17(1).  
56  
57 49. Domanska OM, Firnges C, Bollweg TM, Sørensen K, Holmberg C, Jordan S. Do adolescents  
58  
59  
60

- 1  
2  
3 understand the items of the European Health Literacy Survey Questionnaire (HLS-EU-Q47) -  
4 German version? Findings from cognitive interviews of the project "Measurement of Health  
5 Literacy Among Adolescents" (MOHLAA) in Germany. *Arch Public Heal*. 2018;76(1).  
6
- 7 50. Murugesu L, Heijmans M, Fransen M, Rademakers J. Beter omgaan met beperkte  
8 gezondheidsvaardigheden in de curatieve zorg: kennis, methoden en tools [Dealing with  
9 limited health literacy in curative care: knowledge, methods and tools.]. Utrecht; 2018. 67 p.  
10
- 11 51. Kim SH, Utz S. Association of health literacy with health information-seeking preference in  
12 older people: A correlational, descriptive study. *Nurs Health Sci* [Internet]. 2018  
13 Sep;20(3):355–60. Available from: <http://doi.wiley.com/10.1111/nhs.12413>  
14
- 15 52. Partnership for Clear Health Communication. Ask me 3: Good Questions for Your Health.  
16 2007;  
17
- 18 53. Tamura-Lis W. Teach-Back for Quality Education and Patient Safety. *Urol Nurs* [Internet].  
19 2013;2013:267. Available from: <https://library.suna.org/suna/articles/586/view>  
20
- 21 54. Kripalani S, Weiss BD. Teaching about health literacy and clear communication. *J Gen Intern*  
22 *Med*. 2006;21(8):888–90.  
23
- 24 55. Mackert M, Ball J, Lopez N. Health literacy awareness training for healthcare workers:  
25 Improving knowledge and intentions to use clear communication techniques. *Patient Educ*  
26 *Couns*. 2011;85(3):e225–8.  
27
- 28 56. Karuranga S, Sørensen K, Coleman C, Mahmud AJ. Health Literacy Competencies for European  
29 Health Care Personnel. *HLRP Heal Lit Res Pract*. 2017;1(4):e247–56.  
30
- 31 57. Ryan JG, Leguen F, Weiss BD, Albury S, Jennings T, Velez F, et al. Will patients agree to have  
32 their literacy skills assessed in clinical practice? *Health Educ Res*. 2008;23(4):603–11.  
33
- 34 58. Parikh NS, Parker RM, Nurss JR, Baker DW, Williams M V. Shame and health literacy: The  
35 unspoken connection. *Patient Educ Couns*. 1996;27(1):33–9.  
36
- 37 59. Weiss BD. Health literacy and patient safety: Help patients understand (manual for clinicians).  
38 American Medical Association Foundation and American Medical Association. Chicago; 2007.  
39
- 40 60. Verlinde E, Poppe A, Desmet A, Hermans K, De Maeseneer J, Van Audenhove C, et al. Social  
41 differences in postponing a General Practitioner visit in Flanders, Belgium: Which low-income  
42 patients are most at risk? *Heal Soc Care Community*. 2013;21(4):364–72.  
43
- 44 61. Pelikan JM, Röthlin F, Ganahl K. Comparative report of health literacy in eight EU member  
45 states. The European health literacy survey HLS-EU. [Internet]. 2012. Available from:  
46 <http://www.health-literacy.eu>  
47
- 48 62. Chew LD, Bradley KA, Boyko EJ. Brief questions to identify patients with inadequate health  
49 literacy. *Fam Med*. 2004;36(8):588–94.  
50
- 51 63. Chew LD, Griffin JM, Partin MR, Noorbaloochi S, Grill JP, Snyder A, et al. Validation of  
52 screening questions for limited health literacy in a large VA outpatient population. *J Gen*  
53 *Intern Med*. 2008;23(5):561–6.  
54
- 55 64. Powers BJ, Trinh J V, Bosworth HB. Can This Patient Read and Understand Written Health  
56 Information? *JAMA*. 2010;304(1):76.  
57  
58  
59  
60

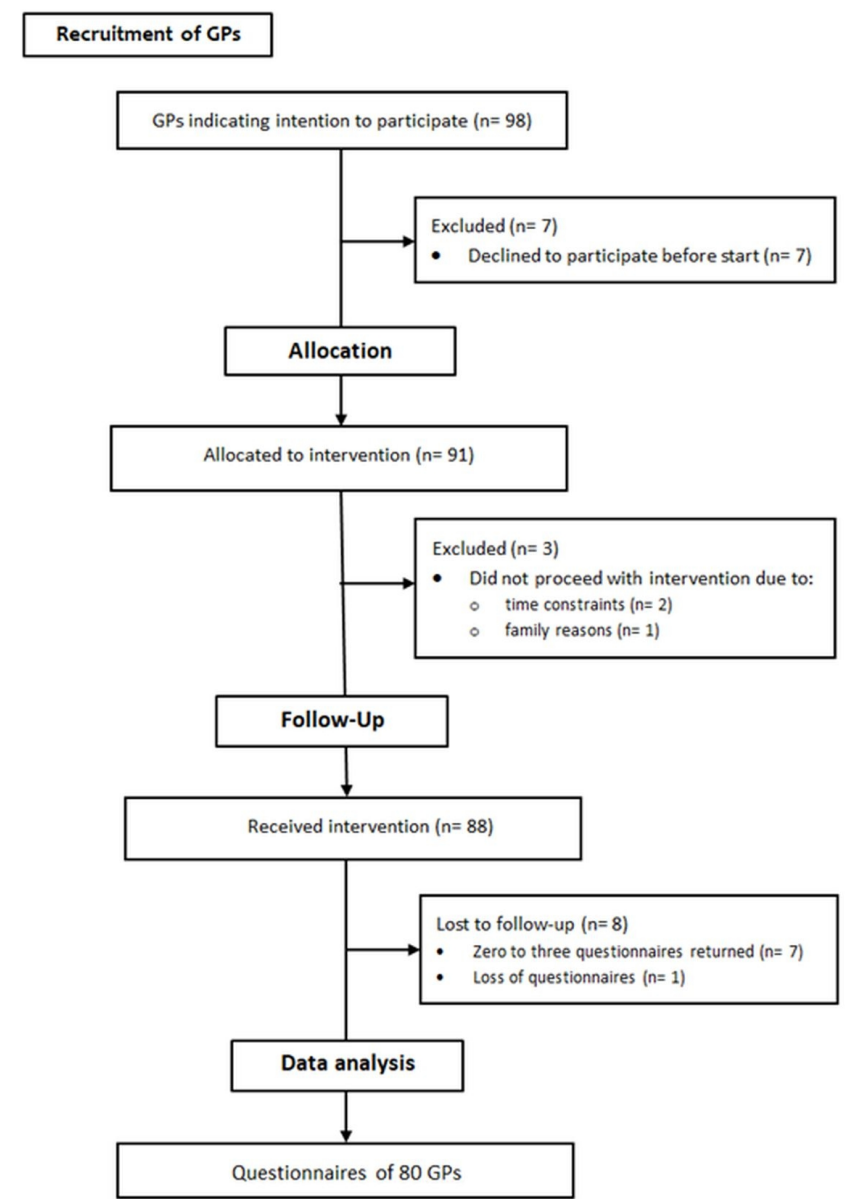

---

Recruitment of general practitioners

99x140mm (300 x 300 DPI)

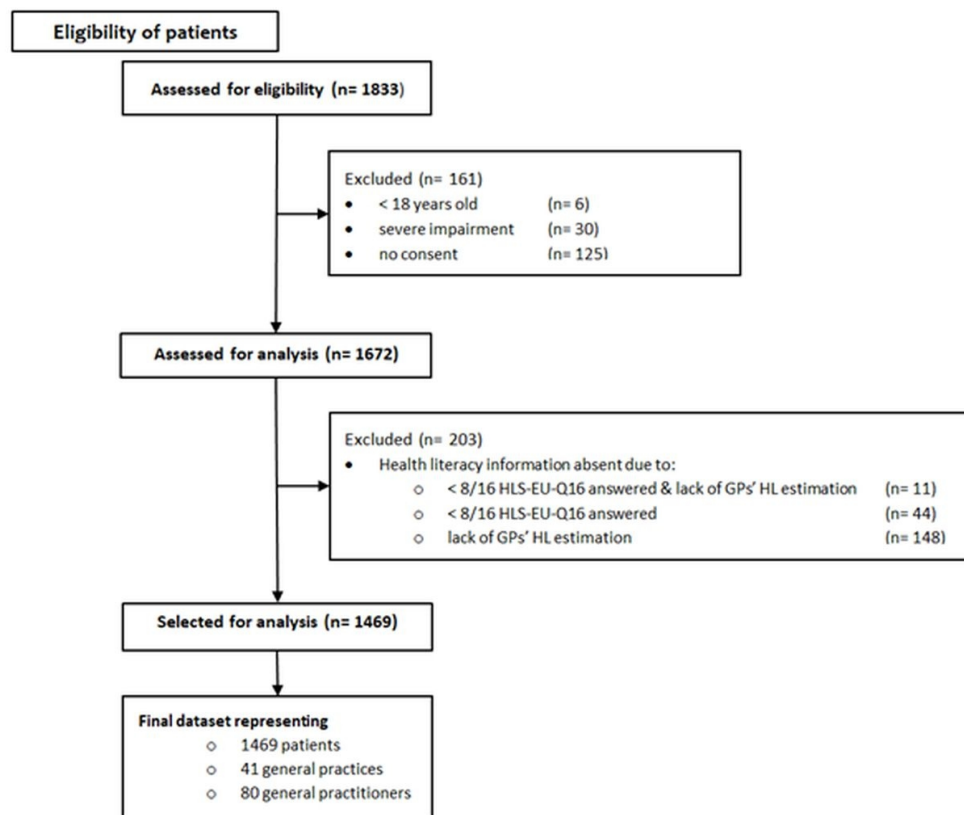

Flow diagram of excluded questionnaires

104x90mm (300 x 300 DPI)

1  
2  
3  
4  
5  
6  
7  
8  
9  
10  
11  
12  
13  
14  
15  
16  
17  
18  
19  
20  
21  
22  
23  
24  
25  
26  
27  
28  
29  
30  
31  
32  
33  
34  
35  
36  
37  
38  
39  
40  
41  
42  
43  
44  
45  
46  
47  
48  
49  
50  
51  
52  
53  
54  
55  
56  
57  
58  
59  
60

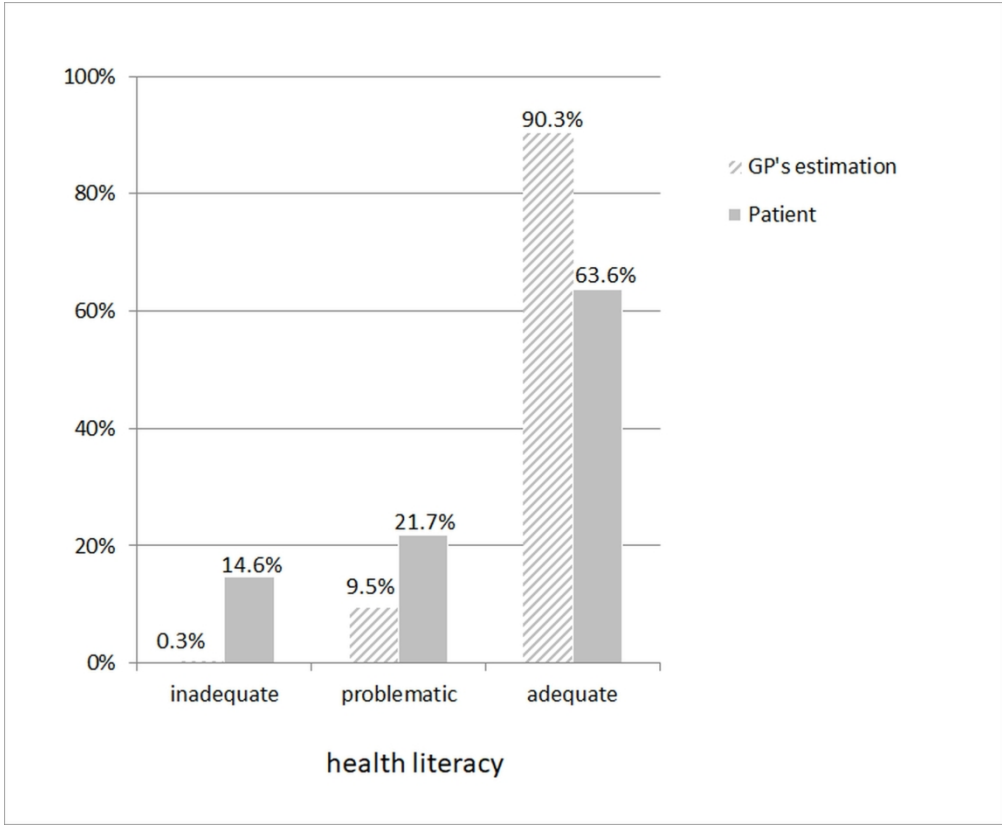

GPs' health literacy estimations and patients' health literacy (n= 1375)

109x90mm (600 x 600 DPI)

1  
2  
3  
4  
5  
6  
7  
8  
9  
10  
11  
12  
13  
14  
15  
16  
17  
18  
19  
20  
21  
22  
23  
24  
25  
26  
27  
28  
29  
30  
31  
32  
33  
34  
35  
36  
37  
38  
39  
40  
41  
42  
43  
44  
45  
46

Appendix - Characteristics of excluded patients

|                                    | < 8/16 HLS-EU-Q16 answered & lack of GPs' HL estimation | < 8/16 HLS-EU-Q16 answered | lack of GPs' health literacy estimation |    |
|------------------------------------|---------------------------------------------------------|----------------------------|-----------------------------------------|----|
| <b>N</b>                           | 11                                                      | 44                         | 148                                     |    |
| <b>HLS-EU-Q16</b>                  |                                                         |                            |                                         |    |
| <b>Number of items scored</b>      |                                                         |                            |                                         |    |
| 0                                  | 7                                                       | 19                         |                                         |    |
| 1                                  |                                                         | 1                          |                                         |    |
| 2                                  | 1                                                       | 1                          |                                         |    |
| 3                                  | 0                                                       | 2                          |                                         |    |
| 4                                  | 0                                                       |                            |                                         |    |
| 5                                  | 0                                                       | 1                          |                                         |    |
| 6                                  | 0                                                       | 2                          |                                         |    |
| 7                                  | 3                                                       | 18                         |                                         |    |
| 8                                  |                                                         |                            |                                         | 18 |
| 9                                  |                                                         |                            |                                         | 2  |
| 10                                 |                                                         |                            |                                         | 1  |
| 11                                 |                                                         |                            |                                         |    |
| 12                                 |                                                         |                            |                                         | 2  |
| 13                                 |                                                         |                            |                                         | 2  |
| 14                                 |                                                         |                            |                                         | 4  |
| 15                                 |                                                         |                            |                                         | 5  |
| 16                                 |                                                         |                            | 114                                     |    |
| Missing values                     |                                                         |                            | 0                                       | 0  |
| <b>Health literacy score on 16</b> |                                                         |                            |                                         |    |
| 0                                  | 7                                                       | 19 (1/7/11)*               |                                         |    |
| 1                                  |                                                         | 2 (1/0/1)                  | 1                                       |    |
| 2                                  | 1                                                       |                            |                                         |    |
| 3                                  |                                                         | 2 (0/1/1)                  |                                         |    |
| 4                                  |                                                         | 1 (0/0/1)                  |                                         |    |
| 5                                  |                                                         | 4 (1/1/2)                  | 2                                       |    |
| 6                                  | 1                                                       | 7 (0/1/6)                  | 7                                       |    |
| 7                                  | 2                                                       | 9 (0/1/8)                  | 4                                       |    |
| 8                                  |                                                         |                            | 12                                      |    |
| 9                                  |                                                         |                            | 8                                       |    |
| 10                                 |                                                         |                            | 4                                       |    |
| 11                                 |                                                         |                            | 8                                       |    |
| 12                                 |                                                         |                            | 7                                       |    |
| 13                                 |                                                         |                            | 9                                       |    |
| 14                                 |                                                         |                            | 20                                      |    |
| 15                                 |                                                         |                            | 15                                      |    |
| 16                                 |                                                         |                            | 51                                      |    |

= 26  
inadequate  
health literacy

= 27  
problematic  
health literacy

= 95  
adequate  
health literacy

\* (GP's estimation that a patient's health literacy is inadequate/problematic/adequate)

|                                               | < 8/16 HLS-EU-Q16 answered<br>& lack of GPs' HL estimation | < 8/16 HLS-EU-Q16 answered | lack of GPs' health literacy estimation |
|-----------------------------------------------|------------------------------------------------------------|----------------------------|-----------------------------------------|
| <b>N</b>                                      | 11                                                         | 44                         | 148                                     |
| <b>Patient</b>                                |                                                            |                            |                                         |
| <b>Sex</b>                                    |                                                            |                            |                                         |
| <i>female</i>                                 | 6                                                          | 28                         | 85                                      |
| <i>male</i>                                   | 4                                                          | 13                         | 61                                      |
| <i>Missing values</i>                         | 1                                                          | 3                          | 3                                       |
| <b>Education</b>                              |                                                            |                            |                                         |
| <i>no formal education</i>                    | 1                                                          | 6                          | 11                                      |
| <i>primary education</i>                      | 0                                                          | 8                          | 13                                      |
| <i>secondary education</i>                    | 7                                                          | 14                         | 56                                      |
| <i>higher education</i>                       | 2                                                          | 6                          | 61                                      |
| <i>Missing values</i>                         | 1                                                          | 10                         | 8                                       |
| <b>Number of years patients consulting GP</b> |                                                            |                            |                                         |
| <1y                                           |                                                            | 5                          | 2                                       |
| 1-5y                                          |                                                            | 12                         | 7                                       |
| 6-10y                                         |                                                            | 3                          | 6                                       |
| >10y                                          |                                                            | 24                         | 29                                      |
| <i>Missing values</i>                         | 10                                                         | 0                          | 105                                     |
| <b>General practitioner</b>                   |                                                            |                            |                                         |
| <b>Sex</b>                                    |                                                            |                            |                                         |
| <i>female</i>                                 | 6                                                          | 17                         | 83                                      |
| <i>male</i>                                   | 5                                                          | 27                         | 66                                      |
| <i>Missing values</i>                         | 0                                                          | 0                          | 0                                       |
| <b>GPs' health literacy estimation</b>        |                                                            |                            |                                         |
| <i>inadequate</i>                             |                                                            | 3                          |                                         |
| <i>problematic</i>                            |                                                            | 11                         |                                         |
| <i>adequate</i>                               |                                                            | 30                         |                                         |
| <i>Missing values</i>                         | 11                                                         |                            | 149                                     |
| <b>Usual doctor or replacement</b>            |                                                            |                            |                                         |
| 1 ( <i>replacement</i> )                      |                                                            | 2                          | 2                                       |
| 2 ( <i>usual GP</i> )                         |                                                            | 41                         | 21                                      |
| <i>Missing values</i>                         | 11                                                         | 1                          | 126                                     |



1  
2  
3  
4  
5  
6  
7  
8  
9  
10  
11  
12  
13  
14  
15  
16  
17  
18  
19  
20  
21  
22  
23  
24  
25  
26  
27  
28  
29  
30  
31  
32  
33  
34  
35  
36  
37  
38  
39  
40  
41  
42  
43  
44  
45  
46

For peer review only

**STROBE Statement**

## Checklist of items that should be included in reports of observational studies

1  
2  
3  
4  
5  
6  
7  
8  
9  
10  
11  
12  
13  
14  
15  
16  
17  
18  
19  
20  
21  
22  
23  
24  
25  
26  
27  
28  
29  
30  
31  
32  
33  
34  
35  
36  
37  
38  
39  
40  
41  
42  
43  
44  
45  
46  
47

| Section/Topic                                                                                      | Item No | Recommendation                                                                                                                                                                             | Reported on Page No |
|----------------------------------------------------------------------------------------------------|---------|--------------------------------------------------------------------------------------------------------------------------------------------------------------------------------------------|---------------------|
| <b>Title and abstract</b>                                                                          | 1       | (a) Indicate the study's design with a commonly used term in the title or the abstract                                                                                                     | 1-2                 |
|                                                                                                    |         | (b) Provide in the abstract an informative and balanced summary of what was done and what was found                                                                                        | 2                   |
| <b>Introduction</b>                                                                                |         |                                                                                                                                                                                            |                     |
| Background/rationale                                                                               | 2       | Explain the scientific background and rationale for the investigation being reported                                                                                                       | 2-3                 |
| Objectives                                                                                         | 3       | State specific objectives, including any prespecified hypotheses                                                                                                                           | 4                   |
| <b>Methods</b>                                                                                     |         |                                                                                                                                                                                            |                     |
| Study design                                                                                       | 4       | Present key elements of study design early in the paper                                                                                                                                    | 5                   |
| Setting                                                                                            | 5       | Describe the setting, locations, and relevant dates, including periods of recruitment, exposure, follow-up, and data collection                                                            | 5                   |
|                                                                                                    |         | (a) <i>Cohort study</i> —Give the eligibility criteria, and the sources and methods of selection of participants. Describe methods of follow-up                                            | 5, Fig. 1 & Fig. 2  |
| Participants                                                                                       | 6       | <i>Case-control study</i> —Give the eligibility criteria, and the sources and methods of case ascertainment and control selection. Give the rationale for the choice of cases and controls |                     |
|                                                                                                    |         | <i>Cross-sectional study</i> —Give the eligibility criteria, and the sources and methods of selection of participants                                                                      |                     |
| Variables                                                                                          | 7       | (b) <i>Cohort study</i> —For matched studies, give matching criteria and number of exposed and unexposed                                                                                   | 5-6                 |
|                                                                                                    |         | <i>Case-control study</i> —For matched studies, give matching criteria and the number of controls per case                                                                                 |                     |
| Data sources/measurement                                                                           | 8*      | Clearly define all outcomes, exposures, predictors, potential confounders, and effect modifiers. Give diagnostic criteria, if applicable                                                   | 5-6                 |
| Bias                                                                                               | 9       | For each variable of interest, give sources of data and details of methods of assessment (measurement). Describe comparability of assessment methods if there is more than one group       | 5-6                 |
| Study size                                                                                         | 10      | Describe any efforts to address potential sources of bias                                                                                                                                  | 5-15&16             |
| Quantitative variables                                                                             | 11      | Explain how the study size was arrived at                                                                                                                                                  | 5                   |
| Statistical methods                                                                                | 12      | Explain how quantitative variables were handled in the analyses. If applicable, describe which groupings were chosen and why                                                               | 6&7                 |
|                                                                                                    |         | (a) Describe all statistical methods, including those used to control for confounding                                                                                                      | 7                   |
|                                                                                                    |         | (b) Describe any methods used to examine subgroups and interactions                                                                                                                        | 7                   |
|                                                                                                    |         | (c) Explain how missing data were addressed                                                                                                                                                | 7                   |
|                                                                                                    |         | (d) <i>Cohort study</i> —If applicable, explain how loss to follow-up was addressed                                                                                                        | 7                   |
| <i>Case-control study</i> —If applicable, explain how matching of cases and controls was addressed |         |                                                                                                                                                                                            |                     |
|                                                                                                    |         | <i>Cross-sectional study</i> —If applicable, describe analytical methods taking account of sampling strategy                                                                               |                     |
|                                                                                                    |         | (e) Describe any sensitivity analyses                                                                                                                                                      |                     |

| Section/Topic            | Item No | Recommendation                                                                                                                                                                                               | Reported on Page No   |
|--------------------------|---------|--------------------------------------------------------------------------------------------------------------------------------------------------------------------------------------------------------------|-----------------------|
| <b>Results</b>           |         |                                                                                                                                                                                                              |                       |
| Participants             | 13*     | (a) Report numbers of individuals at each stage of study—eg numbers potentially eligible, examined for eligibility, confirmed eligible, included in the study, completing follow-up, and analysed            | 5, 7, Fig. 1 & Fig. 2 |
|                          |         | (b) Give reasons for non-participation at each stage                                                                                                                                                         | 5, 7, Fig. 1 & Fig. 2 |
|                          |         | (c) Consider use of a flow diagram                                                                                                                                                                           | Fig. 1 & Fig. 2       |
| Descriptive data         | 14*     | (a) Give characteristics of study participants (eg demographic, clinical, social) and information on exposures and potential confounders                                                                     | 7 & Table 1           |
|                          |         | (b) Indicate number of participants with missing data for each variable of interest                                                                                                                          | 7 & Table 1           |
|                          |         | (c) <i>Cohort study</i> —Summarise follow-up time (eg, average and total amount)                                                                                                                             |                       |
| Outcome data             | 15*     | <i>Cohort study</i> —Report numbers of outcome events or summary measures over time                                                                                                                          |                       |
|                          |         | <i>Case-control study</i> —Report numbers in each exposure category, or summary measures of exposure                                                                                                         |                       |
|                          |         | <i>Cross-sectional study</i> —Report numbers of outcome events or summary measures                                                                                                                           | 7,8,                  |
| Main results             | 16      | (a) Give unadjusted estimates and, if applicable, confounder-adjusted estimates and their precision (eg, 95% confidence interval). Make clear which confounders were adjusted for and why they were included | 8 & Table 2           |
|                          |         | (b) Report category boundaries when continuous variables were categorized                                                                                                                                    | 6                     |
|                          |         | (c) If relevant, consider translating estimates of relative risk into absolute risk for a meaningful time period                                                                                             |                       |
| Other analyses           | 17      | Report other analyses done—eg analyses of subgroups and interactions, and sensitivity analyses                                                                                                               |                       |
| <b>Discussion</b>        |         |                                                                                                                                                                                                              |                       |
| Key results              | 18      | Summarise key results with reference to study objectives                                                                                                                                                     | 14                    |
| Limitations              | 19      | Discuss limitations of the study, taking into account sources of potential bias or imprecision. Discuss both direction and magnitude of any potential bias                                                   | 15                    |
| Interpretation           | 20      | Give a cautious overall interpretation of results considering objectives, limitations, multiplicity of analyses, results from similar studies, and other relevant evidence                                   | 14,15                 |
| Generalisability         | 21      | Discuss the generalisability (external validity) of the study results                                                                                                                                        | 15                    |
| <b>Other Information</b> |         |                                                                                                                                                                                                              |                       |
| Funding                  | 22      | Give the source of funding and the role of the funders for the present study and, if applicable, for the original study on which the present article is based                                                | 17                    |

\*Give information separately for cases and controls in case-control studies and, if applicable, for exposed and unexposed groups in cohort and cross-sectional studies.

**Note:** An Explanation and Elaboration article discusses each checklist item and gives methodological background and published examples of transparent reporting. The STROBE checklist is best used in conjunction with this article (freely available on the Web sites of PLoS Medicine at <http://www.plosmedicine.org/>, Annals of Internal Medicine at <http://www.annals.org/>, and Epidemiology at <http://www.epidem.com/>). Information on the STROBE Initiative is available at [www.strobe-statement.org](http://www.strobe-statement.org).

For peer review only

# BMJ Open

## General practitioners' predictions of their own patients' health literacy: a cross-sectional study in Belgium

|                                 |                                                                                                                                                                                                                                                                                                                                                                                                                                                                                                                                |
|---------------------------------|--------------------------------------------------------------------------------------------------------------------------------------------------------------------------------------------------------------------------------------------------------------------------------------------------------------------------------------------------------------------------------------------------------------------------------------------------------------------------------------------------------------------------------|
| Journal:                        | <i>BMJ Open</i>                                                                                                                                                                                                                                                                                                                                                                                                                                                                                                                |
| Manuscript ID                   | bmjopen-2019-029357.R2                                                                                                                                                                                                                                                                                                                                                                                                                                                                                                         |
| Article Type:                   | Research                                                                                                                                                                                                                                                                                                                                                                                                                                                                                                                       |
| Date Submitted by the Author:   | 11-Jul-2019                                                                                                                                                                                                                                                                                                                                                                                                                                                                                                                    |
| Complete List of Authors:       | Storms, Hannelore; Universiteit Hasselt Faculteit Geneeskunde en Levenswetenschappen, Aertgeerts, Bert; Katholieke Universiteit Leuven Groep Biomedische Wetenschappen, Department of Public Health and Primary Care Vandenabeele, Frank; Universiteit Hasselt Faculteit Geneeskunde en Levenswetenschappen; Universiteit Hasselt Faculteit Revalidatiewetenschappen<br>Claes, Neree; Universiteit Hasselt Faculteit Geneeskunde en Levenswetenschappen; Antwerp Management School, Faculty Leadership, Health Care Management |
| <b>Primary Subject Heading</b>: | General practice / Family practice                                                                                                                                                                                                                                                                                                                                                                                                                                                                                             |
| Secondary Subject Heading:      | Communication, Patient-centred medicine, Public health, Health services research, Health policy                                                                                                                                                                                                                                                                                                                                                                                                                                |
| Keywords:                       | general practice, health literacy, doctor-patient communication, literacy, health disparities, health knowledge                                                                                                                                                                                                                                                                                                                                                                                                                |
|                                 |                                                                                                                                                                                                                                                                                                                                                                                                                                                                                                                                |

SCHOLARONE™  
Manuscripts

1  
2  
3 **General practitioners' predictions of their own patients' health literacy: a**  
4 **cross-sectional study in Belgium**  
5

6  
7 Hannelore Storms (0000-0002-0987-0964)<sup>1</sup>, Bert Aertgeerts<sup>2</sup>, Frank Vandenabeele<sup>1,3</sup>, Neree Claes<sup>1,4,5</sup>  
8

9 **Author affiliations**

10  
11 **Hannelore Storms, MSc**

12  
13 <sup>1</sup> Faculty of Medicine and Life Sciences, Hasselt University, Hasselt, Belgium

14  
15 Email: hannelore.storms@uhasselt.be  
16

17 **Bert Aertgeerts MD, PhD, Professor**

18  
19 <sup>2</sup> Academic Centre for General Practice, Department of Public Health and Primary Care, KU Leuven,  
20 Leuven, Belgium  
21

22  
23 Email: bert.aertgeerts@kuleuven.be  
24

25 **Frank Vandenabeele MD, PhD, Associate Professor**

26  
27 <sup>1</sup> Faculty of Medicine and Life Sciences, Hasselt University, Hasselt, Belgium  
28

29 <sup>3</sup> Faculty of Rehabilitation Sciences, Hasselt University, Hasselt, Belgium  
30

31  
32 Email: frank.vandenabeele@uhasselt.be  
33

34 **Neree Claes MD, PhD, MBA**

35  
36 <sup>1</sup> Faculty of Medicine and Life Sciences, Hasselt University, Hasselt, Belgium,  
37

38 <sup>4</sup> Wit-Gele Kruis Limburg vzw, Genk, Belgium  
39

40 <sup>5</sup> Antwerp Management School, Faculty Leadership, Health Care Management, Antwerp, Belgium  
41

42  
43 Email: nyree@vijgen-claes.be  
44  
45

46 **Correspondence to:** Hannelore Storms, Faculty of Medicine and Life Sciences, Hasselt University,  
47 3500 Hasselt, Belgium; Hannelore.Storms@uhasselt.be  
48  
49  
50  
51  
52  
53  
54  
55  
56  
57  
58  
59  
60

## Abstract

**Objectives** To support patients in their disease management, providing information that is adjusted to patients' knowledge and ability to process health information (i.e. health literacy) is crucial. To ensure effective health communication, general practitioners (GPs) should be able to identify people with limited health literacy. To this end, (dis)agreement between patients' health literacy and GPs' estimations thereof was examined. Also, characteristics impacting health literacy (dis)agreement were studied.

**Design** Cross-sectional survey of general practice patients and GPs undertaken in 2016-17.

**Setting** Forty-one general practices in two Dutch-speaking provinces in Belgium.

**Participants** Patients (18 years of age and older) visiting general practices. Patients were excluded when having severe impairments (physical, mental, sensory).

**Main outcome measures** Patients' health literacy was assessed with HLS-EU-Q16. GPs indicated estimations on patients' health literacy using a simple scale (inadequate; problematic; adequate). (Dis)agreement between patients' health literacy and GPs' estimations thereof (GPs' estimations being equal to/ higher/lower than patients' health literacy) was measured using Kappa statistics. The impact of patient and GP characteristics, including duration of GP-patient relationships, on this (dis)agreement was examined using generalized linear logit model.

**Results** Health literacy of patients (N= 1375) was inadequate (N= 201; 14.6%), problematic (N= 299; 21.7%), adequate (N= 875; 63.6%). GPs over-estimated the proportion patients with adequate health literacy: adequate (N= 1241; 90.3%), problematic (N= 130; 9.5%) and inadequate (N= 4; 0.3%). Overall, GPs' correct; over- ; underestimations of health literacy occurred for respectively 60.9%; 34.2%; 4.9% patients, resulting in a slight agreement (Kappa = .033). The likelihood for GPs to over- or underestimate patients' health literacy increases with decreasing educational level of patients; and decreasing number of years patients have been consulting with their GP.

**Conclusions** Intuitively assessing health literacy is difficult. Patients' education, the duration of GP-patient relationships and GPs' gender impact GPs' perceptions of patients' health literacy.

## Article Summary

### Strengths and limitations of this study

- This is an extensive study, with a large number of patients participating across several general practices.
- Paper-based HLS-EU-Q16 questionnaires were used to encourage patients to fill out the health literacy survey.
- Voluntary GP and patient participation was potentially selective due to the relatively small research window, survey weariness or reluctance to disclose difficulties regarding health communication.

## Introduction

1  
2  
3 Health care is facing enormous challenges. Care is shifting towards managing rather than curing  
4 diseases due to the aging of the population and the rising prevalence of chronic diseases and multi-  
5 morbidity. As a result, doctor-patient interactions are transforming into partnerships in which  
6 patients' needs, values and beliefs influence the course of the care process <sup>1,2</sup>. Besides being  
7 responsive to patients' needs, the complexity of health care forces health care professionals to also  
8 take into account patients' health literacy (HL).  
9  
10

11 Health literacy is defined as 'one's knowledge, motivation and competences to access, understand,  
12 appraise, and apply health information in order to make judgments and take decisions in everyday  
13 life concerning health care, disease prevention and health promotion to maintain or improve quality  
14 of life during the life course' <sup>3</sup>. With the focus on patients managing their care, patients' knowledge,  
15 motivation, understanding and skills with regard to health information are important prerequisites to  
16 guarantee high quality care.  
17  
18  
19

20 Health literacy impacts on accessibility and utilization of care, doctor-patient communication, self-  
21 care, and, subsequently, health outcomes <sup>4-7</sup>. Research in eight European countries demonstrated  
22 that 47% of the population experiences difficulties processing health-related information, hence, has  
23 problematic or inadequate health literacy <sup>8-14</sup>. Since the development of the conceptual framework  
24 of the HLS-EU consortium, health literacy research in Europe - and Belgium - is expanding <sup>3</sup>. In  
25 Belgium, the most renowned studies have focused on the prevalence, with 40% of the Belgian  
26 population being low health literate; on health literacy being an intermediary for tobacco use, health  
27 status, physical activity and the pricing of medication <sup>9</sup> and on the use of health care services and the  
28 associated costs <sup>14</sup>. This research of Vandenbosch et al found no significant effect between  
29 someone's health literacy and the use of health care services such as the emergency room or GP  
30 consultations <sup>14</sup>. However, people with lower health literacy levels were found to have significantly  
31 more hospitalizations and more GP visits at home than those with adequate health literacy <sup>14</sup>.  
32  
33  
34  
35

36 Overall, people with limited health literacy may find it difficult to understand medication  
37 instructions, have poorer medication adherence <sup>7,10,15,16</sup>, use preventive services less <sup>7,17</sup>, have low  
38 self-efficacy <sup>18-20</sup>, struggle with self-managing chronic diseases <sup>7</sup> and have a worse health status than  
39 those with adequate health literacy <sup>7,21</sup>. Most at risk are non-native speakers, the elderly, and those  
40 with limited education <sup>10,13,22,23</sup>. To ensure patients receive appropriate care, health care  
41 professionals should make sure patients are (being) informed, have sufficient understanding, are  
42 given the opportunity to discuss treatment options and are involved in decision making <sup>2</sup>.  
43  
44  
45

46 Awareness of patients' understanding of health information and their ability - and willingness - to be  
47 involved in (decisions about) their care is essential to tailor information and guide patients through  
48 the health care system <sup>24,25</sup>. General practitioners (GPs) in particular are well-placed to ensure  
49 patients receive the care that meets their needs. By communicating effectively and facilitating  
50 patients' involvement in their care process, GPs may contribute to improving health outcomes <sup>4,7,24</sup>.  
51 However, this requires GPs to be able to identify patients with limited health literacy.  
52  
53  
54

55 To date, there are few studies investigating health care professionals' abilities to identify people with  
56 limited health literacy. Moreover, the Northern American studies that exist, demonstrated health  
57 care professionals' inability to identify people with limited health literacy and predominantly over-  
58 estimating health literacy <sup>26-28</sup>. To assess health literacy, these studies relied on so called "objective"  
59 (health) literacy tools (NVS <sup>29</sup>, REALM <sup>30,31</sup>, REALM-R <sup>32</sup>). Their sample sizes were relatively small, with  
60



1  
2  
3 the number of participants ranging from 65 to 182<sup>26–28</sup>. Despite differences in study design, non-  
4 academic primary care physicians, residents, and nurses all overestimated patients' health literacy.  
5 They estimated health literacy to be adequate for respectively 74% ; 90% patients; 68% patients<sup>26–</sup>  
6  
7<sup>28</sup>. The corresponding Kappa's (0.19 and 0.09) demonstrated the 'little' agreement between health  
8 care professionals' estimations and patients' actual health literacy.  
9

10 The aim of this research was to explore the agreement between patients' health literacy and GPs'  
11 health literacy estimations thereof as well as to examine characteristics impacting on this health  
12 literacy (dis)agreement.  
13  
14

## 15 **Methods**

### 16 **Study design**

17 Cross-sectional study with paper based questionnaires (patients and GPs).  
18  
19

### 20 **Recruitment**

21 To recruit GPs, the researcher (HS) contacted 79 GPs working in two Belgian provinces of interest  
22 (Vlaams-Brabant and Limburg) (Fig. 1). Five GPs were in the direct network of the research team and  
23 immediately agreed to participate. Additionally, 73 out of 122 GPs responsible for organizing regional  
24 quality meetings for their peers, were contacted through phone calls and emails. This resulted in 19  
25 invites for the researcher to attend these regional quality meetings. During these meetings, the  
26 researcher informed GPs about the health literacy conceptual framework, the purpose and study  
27 design of this research. Ultimately, 98 GPs expressed their intent to participate (with a varying  
28 number of participating GPs per general practice). The number of participating GPs reduced to 88  
29 because GPs declined to participate before the research was set up (N= 7) or because they were  
30 unable to carry out the research (N= 3). Subsequently, GPs were excluded from data analysis when  
31 fewer than four questionnaires per GP were returned to the researcher (zero questionnaires (N= 4),  
32 between one and three (N= 3) and loss of completed questionnaires (N= 1)) (Fig 1). Recruitment and  
33 start-up took place between October 2016 and December 2017.  
34  
35  
36  
37  
38  
39  
40

### 41 **Sample size**

42 This study used purposive sampling for the recruitment of GPs and patients. It was aimed to reach  
43 2000 patients. Compared to the general population of the Dutch-speaking part of Belgium, women  
44 and people aged 65 years and older were over-represented, with 63% women (compared to 51% in  
45 the adult population of the Dutch-speaking region), and 31% people aged 65 years and older  
46 (compared to 25% in the adult population of the Dutch-speaking region)<sup>33</sup>.  
47  
48  
49

### 50 **Setting and participants**

51 In each general practice, the research window was set to be minimal one month. Participation (GPs  
52 and patients) was voluntary, written informed consent from the latter was obtained prior to medical  
53 consultation. Men and women, 18 years of age and older, consulting with a participating GP, were  
54 eligible for inclusion. Patients were excluded when having a severe cognitive impairment, sensory  
55 disability, psychological or psychiatric disorder. This exclusion was documented by the participating  
56 GPs.  
57  
58  
59

### 60 **Measures**

### **Health literacy**

Health literacy of patients was assessed with HLS-EU-Q16. Derived from the 47-item European Health Literacy Survey Questionnaire (HLS-EU-Q47<sup>3</sup>), this 16-item version measures 11 of 12 sub-dimensions of health literacy as defined by the conceptual model developed by the HLS-EU consortium<sup>34</sup>. These dimensions result from integrating three health relevant domains (health care, disease prevention, health promotion) and four competencies relevant for the processing of health information (access, understand, appraise, apply)<sup>34</sup>. HLS-EU-Q16 highly correlates with the 47-item version, but it does not allow statements on the sub-dimensions of health literacy<sup>34-36</sup>. The Dutch HLS-EU-Q16 has been used in Belgium<sup>9</sup> and in the Netherlands<sup>37,38</sup>.

Items were formulated as questions (“How easy would you say it is to find information on treatments of illnesses that concern you?”, “How easy would you say it is to understand your doctor’s or pharmacist’s instruction on how to take a prescribed medicine?”) Each question was rated on 4-point Likert scales (very difficult; difficult; easy; and very easy). These scores were dichotomized, by coding responses 0 = ‘(very) difficult’ and 1 = ‘(very) easy’. After summing the answers, a score between 0 and 16 was obtained. Consequently, patients were categorized as having *inadequate health literacy* (scoring 0-8 points), *problematic health literacy* (scoring 9-12 points), *adequate health literacy* (scoring 13–16 points).

As opposed to patients’ health literacy assessment, GPs’ estimations of their patients’ health literacy was restricted to indicating either inadequate; problematic; adequate health literacy on a simple scale. To this end, GPs were educated on the health literacy concept and the associated HLS-EU questionnaires, at least twice. Amongst others, GPs were informed about how categories of health literacy were determined, allowing them to scale their patients’ health literacy into one of the three categories.

Where a patient marked two adjacent Likert-scores, the lower (the one referring to experiencing difficulties) score was registered. Where a patient marked two Likert-scores within two points of each other, the middle value was registered (e.g. if 2 and 4 marked, 3 was registered).

### **Other variables**

Patients self-reported their gender (male; female), age (continuous) and educational attainment (no formal education; primary education; secondary education; higher education). The duration of GP-patient relationship was documented by GPs, based on the number of years patients have been visiting them (< 1 year; 1 - 5 years; 6 - 10 years; > 10 years). To determine if patients were consulting their usual GP or not, GPs indicated whether they were substituting for a colleague (yes; no).

GPs’ gender (male; female), age and years since graduation (both continuous) were registered independently from patients’ surveys.

### **Data collection**

Prior to participation, GPs were educated about health literacy. At that moment, the research in general and the GP survey in particular, were presented. Subsequently, GPs could agree to participate. When participating GPs received the surveys, the concept health literacy was explained once again and instructions on how to fill out the GP’s survey were repeated. Boxes labeled with a participating GP’s name were set out in the waiting area. These boxes contained white envelopes, each with a consent form and both a patient and a GP survey, labeled with a unique number. Leaflets

with pictogram instructions were distributed throughout the waiting area to inform patients about the research.

In the waiting room, prior to their consultation with a participating GP, patients would voluntarily choose to fill out the patient survey (patient characteristics and HLS-EU-Q16). During consultation, patients would give their GP the GP survey. Subsequently, at the end of a participating patient's medical consultation, GPs registered patient's age, duration of GP-patient relationship and their own health literacy estimation of that patient in a separate GP survey. Patient and GP surveys were collected in separate envelopes. Not only to encourage patients to answer truthfully, but also to ensure GPs had no access to patients' responses.

### Statistical analyses

Demographic data and health literacy (of patients and estimations by GPs) were analyzed using descriptive statistics. Kappa statistics were calculated to measure agreement between patients' health literacy and GPs' estimations of these patients' health literacy<sup>39</sup>. A generalized linear logit model was used to assess if patient and GP characteristics impacted on GPs estimating health literacy higher/lower (over-/underestimation). GPs' correct estimation (equal to patients' health literacy) was used as the referent group. Patient variables included gender, age and education, the duration of GP-patient relationship. GP variables included gender, age, years graduated and them substituting for a colleague. Missing values on the initially considered variables were excluded from analyses. Finally, analysis on variables with significant results encompassed only three variables (patients' education, the duration of GP-patient relationship and GPs' gender). Statistical significance was assessed as  $p < 0.05$ . Data were analyzed with R<sup>40</sup>.

### Ethical approval and consent

This study was approved by the Ethical Committee of Hasselt University (CME2015/553). Prior to participation, participants received a full explanation of the purpose of the study, their rights as participants, anonymity and confidentiality of the data collected.

### Patient and public involvement

The study design of this research was discussed in the feasibility study on the Dutch HLS-EU-Q16, prior to this study<sup>41</sup>. Based on these participants' recommendations, adjustments were made to the patient survey's layout. Patients did not interpret results nor did they contribute to the writing of the manuscript.

### Results

1833 surveys were filled out and returned. The number of participants reduced to 1469 (and 80 GPs across 41 general practices) due to the exclusion of questionnaires (not eligible (N= 161); data on health literacy were missing (N= 203)) (Fig. 2). The exclusion of questionnaires because of missing health literacy data, predominantly resulted from a lacking health literacy estimation by a GP. Consequently, 148 patients were excluded although patients' health literacy was available. Health literacy of these patients was inadequate (N= 26; 17.6%) , problematic (N= 27; 18.2%) and adequate (N= 95; 64.2%). Characteristics of excluded patients can be found in the supplementary file.

To analyse data using the generalized linear logit model, patients with missing values were excluded (14 and 70 missing values for patients' gender and education; 14 for the duration of GP-patient relationship; 11 for GPs substituting for a colleague). Analyses were performed on the final dataset of 1375 patients (Table 1-3).

### **Sample characteristics**

Patients were on average 54.6 years old (SD 16.4); 63.9% were female; 48.2% was highly educated (Table 1). Regarding the duration of GP-patient relationship, approximately 10% of the patients have been consulting their GP for less than one year, 45.1% for more than 10 years (Table 1).

The mean age of GPs was 42.8 years old (SD 13.5); 53% of GPs were female (N= 80). GPs were graduated on average 17.3 (SD 13.3) years and were working on average 14.3 (SD 13.4) years in their current practice, with a maximum of 48 years (Table 2). Fifteen GPs were working solo; whereas the remaining GPs were working in group practices employing three to seven GPs. Six practices were located in four different regions with high population density, ten practices were located in five multicultural regions.

### **Health Literacy agreement**

Patients' health literacy was adequate, problematic and inadequate in respectively 63.6% (N= 875), 21.7% (N= 299) and 14.6% (N= 201) of 1375 patients, whereas GPs over-estimated the proportion of patients with adequate health literacy, while underestimating the proportion patients with problematic and, in particular, inadequate health literacy: adequate (N= 1241; 90.3%), problematic (N= 130; 9.5%) and inadequate (N= 4; 0.3%) (Fig. 3). Correct estimation of health literacy by GPs, across all categories, occurred for 837/1375 (60.9%) of patients. Health literacy levels were over-estimated for 199+271/1375 (34.2%) of all patients, respectively amongst patients with inadequate and problematic health literacy. Health literacy levels were underestimated for 68/1375 (4.9%) of all patients, in fact, this only concerned patients with adequate health literacy (Table 3). Based on these data, there was slight agreement between patients' health literacy and GPs' estimations thereof,  $\kappa = 0.033$  (95% CI, 0.00124 to 0.0648),  $p < 0.05$ .

### **Characteristics impacting on health literacy (dis)agreement**

Only three variables significantly impacted on the (dis)agreement between GPs' estimations of and patients' actual health literacy: patients' education, the duration of GP-patient relationship and the gender of GPs-.

#### ***Patients' educational level***

Health literacy is more likely to be underestimated when a patient has no formal education (OR 5.58, 95% CI: 1.60 to 19.50); primary education (OR 14.13, 95% CI: 6.54 to 30.54); secondary education (OR 5.05, 95% CI: 2.65 to 9.61), compared to patients with higher education (Table 4). GPs are more likely to over-estimate patients' health literacy in patients with primary education (OR 2.02, 95% CI: 1.22 to 3.13); secondary education (OR 1.34, 95% CI: 1.04 to 1.73), compared to those with higher education (Table 4).

Duration of GP-patient relationship The odds of underestimating health literacy are higher for patients who have been seeing their GP for a relatively short time: health literacy is more likely underestimated in patients consulting with their GP for less than one year (OR 6.7, 95% CI: 1.10 to

1  
2  
3 3.70); between one and five years (OR 4.81, 95% CI: 2.79 to 16.09); between six and ten years (OR  
4 3.70, 95% CI: 2.53 to 9.14) compared to patients who have been consulting with their GP for more  
5 than ten years (Table 4). Over-estimation of health literacy is more likely in patients consulting with  
6 their GP between one and five years, compared to 'more than ten years' (OR 1.51, 95% CI: 1.17 to  
7 1.94) (Table 4).  
8  
9

### 10 **Gender of GPs**

11 The odds of a male GP underestimating health literacy is 2.02 times the odds of a female  
12 underestimating patients' health literacy (Table 4).  
13  
14  
15  
16  
17  
18  
19  
20  
21  
22  
23  
24  
25  
26  
27  
28  
29  
30  
31  
32  
33  
34  
35  
36  
37  
38  
39  
40  
41  
42  
43  
44  
45  
46  
47  
48  
49  
50  
51  
52  
53  
54  
55  
56  
57  
58  
59  
60

For peer review only

Table 1 Patient characteristics

|                                            | Overall sample | Generalized logit model | Patient's health literacy |             |             |
|--------------------------------------------|----------------|-------------------------|---------------------------|-------------|-------------|
|                                            |                |                         | Inadequate                | Problematic | Adequate    |
|                                            | % (N)          | % (N)                   | % (N)                     | % (N)       | % (N)       |
| <b>Gender</b>                              |                |                         |                           |             |             |
| female                                     | 63% (919)      | 63.9% (878)             | 60.7% (122)               | 63.2% (189) | 64.8% (567) |
| Missing values                             | 1% (14)        | 0% (0)                  | 0% (0)                    | 0% (0)      | 0% (0)      |
| <b>Age</b>                                 |                |                         |                           |             |             |
| 18y-24y                                    | 4% (57)        | 3.9% (54)               | 5.5% (11)                 | 5.0% (15)   | 3.2% (28)   |
| 25y-34y                                    | 11% (154)      | 10.4% (143)             | 12.4% (25)                | 12.7% (38)  | 9.1% (80)   |
| 35y-44y                                    | 13% (192)      | 13.2% (182)             | 12.9% (26)                | 13.4% (40)  | 13.3% (116) |
| 45y-54y                                    | 20% (294)      | 20.2% (278)             | 13.4% (27)                | 14.0% (42)  | 23.9% (209) |
| 55y-64y                                    | 21% (311)      | 21.5% (296)             | 25.4% (51)                | 19.7% (59)  | 21.3% (186) |
| 65y-74y                                    | 19% (283)      | 19.3% (265)             | 18.4% (37)                | 22.1% (66)  | 18.5% (162) |
| 75y-84y                                    | 10% (153)      | 9.7% (134)              | 9.0% (18)                 | 11.4% (34)  | 9.4% (82)   |
| 85y-104y                                   | 2% (25)        | 1.7% (23)               | 3.0% (6)                  | 1.7% (5)    | 1.4% (12)   |
| mean age (SD)                              | 54.8 (16.5)    | 54.6 (16.4)             | 54.1 (17.4)               | 54.7 (17.7) | 54.7 (15.7) |
| Missing values                             | 0% (0)         | 0% (0)                  | 0% (0)                    | 0% (0)      | 0% (0)      |
| <b>Educational attainment</b>              |                |                         |                           |             |             |
| no formal education                        | 3.9% (54)      | 3.9% (54)               | 7.0% (14)                 | 5.0% (15)   | 2.9% (25)   |
| primary education                          | 7.6% (107)     | 7.6% (104)              | 11.9% (24)                | 8.0% (24)   | 6.4% (56)   |
| secondary education                        | 40.2% (563)    | 40.3% (554)             | 42.8% (86)                | 42.5% (127) | 39.0% (341) |
| higher education                           | 48.2% (675)    | 48.2% (663)             | 38.3% (77)                | 44.5% (133) | 51.8% (453) |
| Missing values                             | 5% (70)        | 0% (0)                  | 0% (0)                    | 0% (0)      | 0% (0)      |
| <b>Duration of GP-patient relationship</b> |                |                         |                           |             |             |
| < 1y                                       | 9.8% (143)     | 9.5% (130)              | 11.9% (24)                | 9.0% (27)   | 9.0% (79)   |
| 1y - 5y                                    | 29.9% (435)    | 30.0% (412)             | 30.3% (61)                | 34.8% (104) | 28.2% (247) |

|                |             |             |            |             |             |
|----------------|-------------|-------------|------------|-------------|-------------|
| 6y - 10y       | 15.4% (225) | 15.5% (213) | 14.4% (29) | 14.0% (42)  | 16.2% (142) |
| > 10y          | 44.8% (652) | 45.1% (620) | 43.3% (87) | 42.1% (126) | 46.5% (407) |
| Missing values | 1% (14)     | 0% (0)      | 0% (0)     | 0% (0)      | 0% (0)      |
| <b>Total N</b> | <b>1469</b> | <b>1375</b> | <b>201</b> | <b>299</b>  | <b>875</b>  |

For peer review only

**Table 2 GP characteristics**

|                                     | Overall sample | Generalized logit model | Patient's health literacy |                |             |
|-------------------------------------|----------------|-------------------------|---------------------------|----------------|-------------|
|                                     |                |                         | Inadequate HL             | Problematic HL | Adequate HL |
|                                     | % (N)          | % (N)                   | % (N)                     | % (N)          | % (N)       |
| <b>Gender</b>                       |                |                         |                           |                |             |
| female                              | 51.1% (750)    | 51.4% (668)             | 47.3% (95)                | 50.5% (151)    | 52.7 (461)  |
| Missing values                      | 0% (0)         | 0% (0)                  | 0% (0)                    | 0% (0)         | 0% (0)      |
| <b>Age</b>                          |                |                         |                           |                |             |
| 25y-34y                             | 28.9% (425)    | 28.5% (392)             | 29.4% (59)                | 31.1% (93)     | 27.4% (240) |
| 35y-44y                             | 19.5% (287)    | 20.0% (275)             | 18.9% (38)                | 19.7% (59)     | 20.3% (178) |
| 45y-54y                             | 25.1% (368)    | 25.2% (346)             | 21.9% (44)                | 24.7% (74)     | 26.1% (228) |
| 55y-64y                             | 20.8% (305)    | 20.4% (281)             | 20.4% (41)                | 19.4% (58)     | 20.8% (182) |
| 65y-74y                             | 5.7% (84)      | 5.9% (81)               | 9.5% (19)                 | 5.0% (15)      | 5.4% (47)   |
| 75y-84y                             | 0% (0)         | 0% (0)                  | 0% (0)                    | 0% (0)         | 0% (0)      |
| <b>Substituting for a colleague</b> |                |                         |                           |                |             |
| yes                                 | 5.6% (82)      | 5.4% (74)               | 9.0% (18)                 | 3.7% (11)      | 5.1% (45)   |
| Missing values                      | 0.7% (11)      | 0% (0)                  | 0% (0)                    | 0% (0)         | 0% (0)      |
| <b>Total N</b>                      | <b>1469</b>    | <b>1375</b>             | <b>201</b>                | <b>299</b>     | <b>875</b>  |



**Table 3 GP health literacy estimation**

|                                                                                   | Overall sample | Generalized logit model | Patient's health literacy |                          |                          |
|-----------------------------------------------------------------------------------|----------------|-------------------------|---------------------------|--------------------------|--------------------------|
|                                                                                   |                |                         | Inadequate HL             | Problematic HL           | Adequate HL              |
|                                                                                   | % (N)          | % (N)                   | % (N)                     | % (N)                    | % (N)                    |
| <b>Health literacy estimation</b>                                                 |                |                         |                           |                          |                          |
| inadequate                                                                        | 0.3% (5)       | 0.3% (4)                | 1.0% (2) <sup>○</sup>     | 0% (0) <sup>▽</sup>      | 0.2% (2) <sup>▽▽</sup>   |
| problematic                                                                       | 9.5% (139)     | 9.5% (130)              | 17.9% (36) <sup>△</sup>   | 9.4% (28) <sup>○</sup>   | 7.5% (66) <sup>▽</sup>   |
| adequate                                                                          | 90.2% (1325)   | 90.3% (1241)            | 81.1% (163) <sup>△△</sup> | 90.6% (271) <sup>△</sup> | 92.2% (807) <sup>○</sup> |
| <b>Agreement between patients' health literacy &amp; GPs' estimations thereof</b> |                |                         |                           |                          |                          |
| over-estimation                                                                   | 34.6% (508)    | 34% (470)               | 99% (199)                 | 91% (271)                | N/A                      |
| equal estimation                                                                  | 60.7% (891)    | 61% (837)               | 1% (2)                    | 9% (28)                  | 92% (807)                |
| underestimation                                                                   | 4.7% (70)      | 5% (68)                 | N/A                       | 0% (0)                   | 8% (68)                  |
| <b>Total N</b>                                                                    | <b>1469</b>    | <b>1375</b>             | <b>201</b>                | <b>299</b>               | <b>875</b>               |

GPs estimate health literacy equal to <sup>○</sup>/one level lower <sup>▽</sup>/one level higher <sup>△</sup> or two levels lower <sup>▽▽</sup>/ two levels higher <sup>△△</sup>/than patients' actual health literacy

**Table 4 Odds ratios and 95% confidence intervals for patient and GP characteristics impacting GPs’ estimations of patients’ health literacy (p < 0.05)**

|                                                                                | Health literacy disagreement <sup>a</sup> | Odds Ratio | 95% confidence interval |
|--------------------------------------------------------------------------------|-------------------------------------------|------------|-------------------------|
| <b>Patients’ education (referent category: higher education)</b>               |                                           |            |                         |
| no formal education                                                            | Underestimation <sup>b</sup>              | 5.58       | 1.60 to 19.50           |
| primary education                                                              | underestimation                           | 14.13      | 6.54 to 30.54           |
|                                                                                | over-estimation <sup>c</sup>              | 2.02       | 1.22 to 3.13            |
| secondary education                                                            | underestimation                           | 5.05       | 2.65 to 9.61            |
|                                                                                | over-estimation                           | 1.34       | 1.04 to 1.73            |
| <b>Duration of GP-patient relationships (referent category: &gt; 10 years)</b> |                                           |            |                         |
| <1 year                                                                        | underestimation                           | 6.7        | 1.10 to 3.70            |
|                                                                                | over-estimation                           | 1.51       | 1.17 to 1.94            |
| 1 - 5 years                                                                    | underestimation                           | 4.81       | 2.79 to 16.09           |
|                                                                                | over-estimation                           | 1.51       | 1.17 to 1.94            |
| 6 - 10 years                                                                   | underestimation                           | 3.70       | 2.53 to 9.14            |
|                                                                                | over-estimation                           | 1.51       | 1.17 to 1.94            |
| <b>GPs’ gender (referent category: female)</b>                                 |                                           |            |                         |
| male                                                                           | underestimation                           | 2.02       | 1.69 to 8.09            |

<sup>a</sup> GPs’ estimations versus patients’ health literacy, with reference group: GPs’ estimations of patients’ health literacy = patients’ health literacy

<sup>b</sup> underestimation: GPs’ estimations of patients’ health literacy < patients’ health literacy

<sup>c</sup> over-estimation: GPs’ estimations of patients’ health literacy > patients’ health literacy

## Discussion

Our findings demonstrate that GPs' estimates of patients' health literacy showed a high rate of agreement with the assessment using HLS-EU-Q16 for patients with adequate literacy. However, GPs' estimates showed a low level of agreement with the HLS-EU-Q16 for patients identified with inadequate or problematic literacy. Consequently, GPs considerably over-estimated health literacy levels in patients identified with inadequate or problematic literacy using HLS-EU-Q16. Furthermore, GPs over-estimate the proportion of patients with adequate and underestimate the proportion of patients with inadequate health literacy. GPs' health literacy over- and underestimations are significantly affected by patients' education and the duration of GP-patient relationships, as well as GPs' gender. Health literacy is more likely to be over- or underestimated with decreasing educational level, compared to higher education. The likelihood to over- or underestimate health literacy is also higher in patients who have been consulting their GP a relatively short period of time (less than ten years), compared to patients who have been consulting their GP for over ten years.

### Comparison with previous studies

The majority of GPs perceived their patients to have adequate health literacy, although 10% of patients had inadequate health literacy<sup>9,12</sup>. This corresponds to previous research in a hospital setting, demonstrating that these doctors' health literacy overestimations outnumber their underestimations with nearly 2-to-1<sup>26</sup>. A similar outcome was reported, focusing on nurses<sup>28</sup>. Only one study described primary care physicians over-estimating patients' health literacy<sup>27</sup>.

### Education

GPs seem to seek guidance in patients' educational level when estimating health literacy. We are, however, not sure patients ever explicitly disclosed their educational level to their GPs. Numerous studies have demonstrated the correlation between health literacy and education<sup>9,22,23</sup>: lower health literacy is observed in people with lower educational levels, although highly educated people may also have poor health literacy<sup>12,23</sup>. Despite of its correlation with health literacy, there's a fundamental difference between literacy and health literacy, which is emphasized in several studies<sup>9,12,23</sup>. Undoubtedly, literacy is a vital skill to function with or within the contemporary health care system. However, complementary, advanced skills are necessary to execute instructions, interact with health care professionals and critically appraise information<sup>20,42,43</sup>. Our findings particularly indicate that for patients with primary education there is an increased likelihood for GPs to over- but also to underestimate their health literacy.

**Duration of GP-patient relationship** Our findings indicate that a long standing doctor – patient relationship helps GPs to get a better understanding of their patients, or at least of their health literacy. When seeing patients for a longer period of time, it is most likely GPs will have a better notion of their patients' wishes, health beliefs and their preferences. Moreover, it enables them to get more insight in the lives of their patients: their living circumstances, meaningful relationships, social network,...

More specifically, health literacy of patients who have been consulting their GPs for more than ten years is more likely correctly estimated. In contrast, chances are particularly high that health literacy of patients who have been consulting their GP less than one year, is underestimated. This result could indicate a more cautious approach on the part of GPs, being less acquainted with these

1  
2  
3 patients. Over-estimation of health literacy, on the other hand, was only found in patients seeing  
4 their GPs between one and five years.  
5

6 To explain these findings, we turned to studies focusing on continuity of care, as a key dimension of  
7 good primary care<sup>44</sup>. Consequently, we are putting the duration of GP-patient relationship on an  
8 equal footing with continuity of care as described in previous studies. Findings presented in these  
9 studies support our results, as continuity of care correlates with improved adherence to physicians'  
10 instructions<sup>45</sup> and better communication<sup>46</sup>. Moreover, being cared for less than one year by the  
11 same care provider was associated with decreasing communication excellence<sup>47</sup>. Although  
12 (dis)satisfaction with communication may stem from being unaware of patients' health literacy, we  
13 did not find studies linking their results to patients' knowledge, their understanding of, or the  
14 processing of health information.  
15  
16  
17

### 18 **Implications & recommendations for clinical practice**

19  
20 GPs in our research were often not able to estimate health literacy of their patients. We would  
21 recommend GPs to perform some sort of health literacy assessment, instead of going by intuition.  
22 Therefore, feasible alternatives for clinical practice should be considered<sup>29</sup>, such as using single item  
23 questions<sup>28,48</sup>, or prompt lists<sup>49</sup> preferably tested by the target group to avoid comprehension  
24 problems<sup>41,50,51</sup>, but, above all, by supporting patients to understand information. Besides asking  
25 patients directly about their understanding and the kind of information and/or (practical) support  
26 they might need, patients should be provided tools to ensure they understand, but can also recall  
27 what has been said<sup>16,52</sup>. Two examples worth mentioning are the Ask me 3 questions campaign<sup>53</sup> or  
28 the use of the teach-back method<sup>54</sup>. The former is designed to help patients receive appropriate  
29 information on: "What is my main problem?"; "What do I need to do (about the problem)?"; "Why is  
30 it important for me to do this?". The latter refers to a method that consists of asking patients to  
31 repeat back what was just said (instructions, next steps to be taken). Based on their answers, it will  
32 be clear when there is a need for clarification. Moreover, educating (future) GPs and making them  
33 familiar with the health literacy concept and the implications of low health literacy is a prerequisite  
34 to address health literacy<sup>55</sup>. GPs should get to know their patients. In particular it is important to  
35 know who is experiencing barriers to care and how to reach these patients. Being able to identify  
36 people with limited health literacy will help GPs to tackle health inequalities, for example by  
37 adequate information exchange. Hence, GPs should be equipped with a variety of strategies they can  
38 integrate in their day-to-day practice to communicate on a low health literacy level<sup>55-57</sup>.  
39  
40  
41  
42  
43  
44  
45

### 46 **Strengths and limitations**

47  
48 GP participation was potentially selective, although several attempts to contact and motivate GPs  
49 were undertaken. Given, selection bias may have occurred in the relatively small research window.  
50 Some patients might not have had the chance to participate because of not visiting their GP, some  
51 patients may have felt reluctant<sup>58</sup> or ashamed to disclose health literacy information<sup>50,59,60</sup>. Also, the  
52 voluntariness of patients to participate impacted on the study sample. This not only resulted in a  
53 small fraction of GPs' presumable patient population that took part in the research – the number of  
54 patients per GP was below 30, whereas we would expect a GP's patient population to be around  
55 1000 patients-; it is likely, that participating in research is more easy for some patients (for instance,  
56 literate patients) than for others. Hence, they would be more eager to participate than others.  
57 Survey weariness, the length or usability of a paper-based questionnaire may have discouraged  
58  
59  
60

1  
2  
3 patients from participating, particularly more vulnerable patients (illiterate, non-natives).  
4 Nevertheless, many patients with low health literacy and low education participated. People  
5 experiencing barriers to care might have been missed. If so, their participation would have enriched  
6 data if the reason for not visiting their GP or for not participating would be linked to health literacy,  
7 for example because of low trust in GPs or poor self-related health<sup>61</sup>. Some GPs had the impression  
8 that the majority of participating patients had a profile not reflecting the diversity of their patient  
9 population. Patients were felt to be Dutch-speaking, illiterate and/or involved, empowered patients,  
10 predominantly without migration background (except for those general practices in the multicultural  
11 regions). This limitation also makes our findings more powerful. If incorrect health literacy  
12 estimations imply that GPs assume that these particular patients function adequately in a health care  
13 setting, this would make those patients more vulnerable to not accessing appropriate care. After all,  
14 if participating patients did not represent minority groups or patients with some vulnerability, GPs'  
15 relatively high scores on patients' health literacy would indicate that GPs lack awareness on these  
16 "un-obvious" patients to experience difficulties with health-related information. It would be  
17 interesting to examine how a more diverse sample - patients who are illiterate, with limited Dutch  
18 proficiency, with different backgrounds, with certain comorbidities, but also patients GPs visited at  
19 home<sup>14</sup> and not solely within their practice - would impact results.

20  
21 This research relies on HLS-EU-Q16 to measure comprehensive health literacy. As opposed to the  
22 original 47-item version, this 16-item version was developed for quicker assessment of health  
23 literacy. However, assessment with HLS-EU-Q16 does not allow statements on a health literacy sub-  
24 dimension. The output of these 16 items, covering only 11 of the 12 dimensions, is an overall health  
25 literacy score<sup>3</sup>. Hence, GPs were required to give an overall health literacy score as well, instead of  
26 them being able to score a particular sub-dimension. Future research could aim to assess certain sub-  
27 dimensions and the (dis)agreement of GPs' predictions with patients' health literacy with respect to a  
28 particular sub-dimension. In this study, however, HLS-EU-Q16 was purposively chosen to allow easy  
29 assessment of health literacy in general population.

30  
31 Responses on the HLS-EU-Q16 are prone to subjectivity because patients' - self-perceived - health  
32 literacy is assessed<sup>62</sup>, as opposed to tools designed to examine people succeeding in specific  
33 problem-solving tasks, which are regarded as more "objective"<sup>62</sup>. Nonetheless, self-reported  
34 questions are considered valid and feasible methods to assess health literacy<sup>63-65</sup>. Despite the  
35 differences between self-perceived and objective health literacy measurements, both benefit of  
36 being tailored to targeted groups. Unless it is part of the design, tools relying on vocabulary  
37 unfamiliar to the target group - consisting of terms this target group does not come across in  
38 everyday life - enhances the difficulty of a particular tool. Consequently, the output will reflect  
39 someone's ability to understand the tool itself (its design, the questions, answer options,..), rather  
40 than one's health literacy<sup>50</sup>. Mindful of potential comprehension problems, feasibility of HLS-EU-Q16  
41 was tested prior to this study<sup>41</sup>. In correspondence with other studies, the level of abstraction or  
42 lacking experience regarding some health-related tasks in health care, health promotion and disease  
43 prevention made it difficult to answer some items, but overall HLS-EU-Q16 was considered a feasible  
44 instrument<sup>41,50</sup>.

45  
46 Finally, almost 10% of participants were excluded from final analyses due to missing data on health  
47 literacy. However, looking into detail, 148 data were excluded solely because they lacked GPs' health  
48 literacy estimations and not because patients' health literacy could not be assessed. Excluded data  
49  
50  
51  
52  
53  
54  
55  
56  
57  
58  
59  
60

1  
2  
3 often originated from GP surveys that were returned blank or incomplete. Possible explanations are  
4 that GPs did not receive a GP survey from their patients; or GPs on their part might have been lacking  
5 time to complete the survey.  
6

## 7 8 **Conclusion** 9

10 Intuitively assessing patients' health literacy is difficult. Patients' education, the duration of GP-  
11 patient relationship, as well as the gender of the GP impact on the estimations GPs make regarding  
12 patients' health literacy. With decreasing educational levels, the likelihood for GPs to incorrectly  
13 estimate patients' health literacy increases, suggesting patients' education is not a good indicator for  
14 patients' health literacy. Consequently, GPs should be aware of the health literacy concept and it  
15 being different from 'literacy' (i.e. education). It would be beneficial to facilitate and encourage GPs  
16 to get a profound understanding of their patients and their lives. A long standing relationship  
17 between GPs and patients can contribute to GP-patient acquaintance. Based on our findings,  
18 consulting with a particular GP for more than ten years may lead to GPs making more correct  
19 estimates on these patients' health literacy. With health care being redesigned to be more  
20 integrated, comes an opportunity to promote in-depth communication as the cornerstone for  
21 everyone to access adequate care. To be incorporated in daily practice, GPs should be allowed to  
22 invest a sufficient amount of time in getting to know their patients.  
23  
24  
25  
26

## 27 28 **Acknowledgements** 29

30 We thank GPs, their support staff and patients at all general practices, without whom this study  
31 would not have been possible. We greatly appreciate the support and the contribution of the  
32 consultants of I-BioStat, Center for Statistics, UHasselt. Last but not least, a special thanks to those  
33 helping out with the logistics.  
34

## 35 36 **Contributors** 37

38 HS was responsible for study concept and design (with valuable input from BA and NC) and for data  
39 acquisition and for initial analyses. Data interpretation with all authors (HS, BA, FV, NC) led to a  
40 manuscript drafted by HS. All authors substantially contributed to critically reviewing the manuscript  
41 and all read and approved the final version. All authors had full access to all of the study data and  
42 take responsibility for the integrity of the data and the accuracy of the data. The corresponding  
43 author attests that all listed authors meet authorship criteria and that no others meeting the criteria  
44 have been omitted.  
45  
46  
47

## 48 49 **Funding** 50

51 This research received no specific grant from any funding agency in the public, commercial or not-  
52 for-profit sectors.  
53

## 54 55 **Competing interests** 56

57 All authors have completed the ICMJE uniform disclosure form  
58 at [www.icmje.org/coi\\_disclosure.pdf](http://www.icmje.org/coi_disclosure.pdf) and declare: no support from any organisation for the  
59 submitted work; no financial relationships with any organisations that might have an interest in the  
60

1  
2  
3 submitted work in the previous three years; no other relationships or activities that could appear to  
4 have influenced the submitted work.  
5

## 6 **Ethical approval**

7  
8 This study was approved by the Ethical Committee of Hasselt University (CME2015/553). Prior to  
9 participation, participants received a full explanation of the purpose of the study, their rights as  
10 participants, anonymity and confidentiality of collected data.  
11  
12

## 13 **Transparency**

14  
15 The lead author affirms that this manuscript is an honest, accurate, and transparent account of the  
16 study being reported; that no important aspects of the study have been omitted; and that any  
17 discrepancies from the study as planned (and if relevant registered) have been explained.  
18  
19

## 20 **Data sharing**

21  
22 The dataset used and/or analyzed during the current study are available from the corresponding  
23 author upon reasonable request.  
24  
25

## 26 **Figure legends**

27  
28 Fig. 1 Recruitment of general practitioners

29  
30 Fig. 2 Flow diagram of excluded questionnaires

31  
32 Fig. 3 GPs' health literacy estimations and patients' health literacy (N= 1375)  
33  
34  
35  
36  
37  
38  
39  
40  
41  
42  
43  
44  
45  
46  
47  
48  
49  
50  
51  
52  
53  
54  
55  
56  
57  
58  
59  
60



## References

1. Epstein R., Kevin F, Cara S., Kurt C. Why the Nation Needs a Policy Push on Patient-centred Care. *Health Aff.* 2010;29(8):1489–95.
2. Epstein RM, Street RL. The Values and Value of Patient-Centered Care. *Ann Fam Med.* 2011;9(2):100–3.
3. Sørensen K, Van den Broucke S, Fullam J, Doyle G, Pelikan J, Slonska Z, et al. Health literacy and public health: a systematic review and integration of definitions and models. *BMC Public Health.* 2012;12(1):80.
4. Stewart MA. Effective physician-patient communication and health outcomes: a review. *CMAJ.* 1995;152(9):1423–33.
5. Lindau ST, Tomori C, Lyons T, Langseth L, Bennett CL, Garcia P. The association of health literacy with cervical cancer prevention knowledge and health behaviors in a multiethnic cohort of women. *Am J Obstet Gynecol.* 2002;186(5):938–43.
6. Paasche-Orlow MK, Wolf MS. The Causal Pathways Linking Health Literacy to Health Outcomes. *Am J Health Behav.* 2007;31(1):19–26.
7. Berkman ND, Sheridan SL, Donahue KE, Halpern DJ, Crotty K. Low Health Literacy and Health Outcomes: An Updated Systematic Review. *Ann Intern Med.* 2011;155(2):97.
8. Vancorenland S, Avalosse H, Verniest R, Callens M, Van den Broucke S, Renwart A, et al. Bilan des connaissances des Belges en matière de santé. *MC-Information.* 2014;258:48–55.
9. Van den Broucke S, Renwart A. La littératie en santé en Belgique: un médiateur des inégalités sociales et des comportements de santé. Université Catholique de Louvain. 2014. 22 p.
10. Institute of Medicine. *Health Literacy: A Prescription to End Confusion.* Washington, D.C.: National Academies Press; 2004. 366 p.
11. Kirsch IS, Jungeblut A, Jenkins L, Kolstad A. *Adult literacy in America: A first look at the results of the National Adult Literacy Survey.* Office of Educational Research and Improvement, U.S. Dept. of Education. Washington, D.C.; 1993. 178 p.
12. Kickbush I, Pelikan JM, Apfel F, Tsouros A. *Health Literacy: The solid facts.* World Health Organisation (WHO): Regional Office for Europe. Copenhagen; 2013.
13. Sørensen K, Pelikan JM, Röthlin F, Ganahl K, Slonska Z, Doyle G, et al. Health literacy in Europe: comparative results of the European health literacy survey (HLS-EU). *Eur J Public Health.* 2015;25(6):1053–8.
14. Vandebosch J, Van den Broucke S, Vancorenland S, Avalosse H, Verniest R, Callens M. Health literacy and the use of healthcare services in Belgium. *J Epidemiol Community Health.* 2016;70(10):1032–8.
15. Shrank WH, Avorn J. Educating Patients About Their Medications: The Potential And Limitations Of Written Drug Information. *Health Aff.* 2007;26(3):731–40.
16. Brooks C, Ballinger C, Mander C, Adams J, Nutbeam D, Mander C, et al. Nursing and allied health professionals' views about using health literacy screening tools and a universal precautions approach to communication with older adults: a qualitative study. *Disabil Rehabil.* 2019;0(0):1–7.



17. Miller DP, Brownlee CD, McCoy TP, Pignone MP. The effect of health literacy on knowledge and receipt of colorectal cancer screening: a survey study. *BMC Fam Pract*. 2007;8(1):16.
18. Baker DW, Parker RM, Williams M V., Pitkin K, Parikh NS, Coates W, et al. The Health Care Experience of Patients with Low Literacy. *Arch Fam Med*. 1996;5(6):329–34.
19. Sarkar U, Fisher L, Schillinger D. Is self-efficacy associated with diabetes self-management across race/ethnicity and health literacy? *Diabetes Care*. 2006;29(4):823–9.
20. Nutbeam D. Health literacy as a public health goal: a challenge for contemporary health education and communication strategies into the 21st century. *Health Promot Int*. 2000;15(3):259–67.
21. Baker DW. Health Literacy and Mortality Among Elderly Persons. *Arch Intern Med*. 2007;167(14):1503.
22. van der Heide I, Rademakers J, Schipper M, Droomers M, Sørensen K, Uiters E. Health literacy of Dutch adults: a cross sectional survey. *BMC Public Health*. 2013;13:179.
23. van der Heide I, Wang J, Droomers M, Spreeuwenberg P, Rademakers J, Uiters E. The Relationship Between Health, Education, and Health Literacy: Results From the Dutch Adult Literacy and Life Skills Survey. *J Health Commun*. 2013;18(sup1):172–84.
24. Schillinger D, Piette J, Grumbach K, Wang F, Wilson C, Daher C, et al. Closing the loop: Physician Communication with Diabetic Patients Who Have Low Health Literacy. *Arch Intern Med*. 2003;163:83–90.
25. Bergeson SC, Dean JD. A Systems Approach to Patient-Centered Care. *JAMA*. 2006;296(23):2848.
26. Bass PF, Wilson JF, Griffith CH, Barnett DR. Residents' ability to identify patients with poor literacy skills. *Acad Med*. 2002;77(10):1039–41.
27. Kelly PA, Haidet P. Physician overestimation of patient literacy: A potential source of health care disparities. *Patient Educ Couns*. 2007;66(1):119–22.
28. Dickens C, Lambert BL, Cromwell T, Piano MR. Nurse Overestimation of Patients' Health Literacy. *J Health Commun*. 2013;18(sup1):62–9.
29. Weiss BD. Quick Assessment of Literacy in Primary Care: The Newest Vital Sign. *Ann Fam Med*. 2005;3(6):514–22.
30. Davis T, Long S, Jackson R, Mayeaux E, George R, Murphy P, et al. Rapid estimate of adult literacy in medicine: a shortened screening instrument. *Fam Med*. 1993;25:391–5.
31. Davis TC, Gazmararian J, Kennen EM. Approaches to Improving Health Literacy : Lessons From the Field. *Joural Heal Commun*. 2006;11:551–4.
32. Bass PF, Wilson JF, Griffith CH. A shortened instrument for literacy screening. *J Gen Intern Med*. 2003 Dec;18(12):1036–8.
33. Directorate-General Statistics Belgium. Population by place of residence, nationality and age. 2019.
34. Pelikan JM, Röthlin F, Ganahl K, Peer S. Measuring comprehensive health literacy in general populations - the HLS-EU instruments. In: *The Second International Conference of Health*

- 1  
2  
3 Literacy and Health Promotion, Taipei,Taiwan, 6-8102014. 2014.  
4  
5 35. Röthlin F, Pelikan J, Ganahl K. Die Gesundheitskompetenz Jugendlichen in Österreich. 2013.  
6  
7 36. HLS-EU-Consortium. HLS-EU-Q Measurement of Health Literacy in Europe: HLS-EU-Q47; HLS-  
8 EU-Q16; and HLS-EU-Q86. Exec Agency Heal Consum. 2012;1–14.  
9  
10 37. Pander Maat H, Essink-Bot M-L, Leenaars KE, Fransen MP. A short assessment of health  
11 literacy (SAHL) in the Netherlands. BMC Public Health. 2014;14(1):990.  
12  
13 38. Fransen MP, Leenaars KEF, Rowlands G, Weiss BD, Maat HP, Essink-Bot M-L. International  
14 application of health literacy measures: Adaptation and validation of the newest vital sign in  
15 The Netherlands. Patient Educ Couns. 2014;97(3):403–9.  
16  
17 39. Cohen J. A Coefficient of Agreement for Nominal Scales. Educ Psychol Meas. 1960;20(1):37–  
18 46.  
19  
20 40. R Development Core Team. R: A Language and Environment for Statistical Computing  
21 [Internet]. Vienna, Austria: R Foundation for Statistical Computing; 2008. Available from:  
22 <http://www.r-project.org/>  
23  
24 41. Storms H, Claes N, Aertgeerts B, Van Den Broucke S. Measuring health literacy among low  
25 literate people: an exploratory feasibility study with the HLS-EU questionnaire. BMC Public  
26 Health. 2017;17(1).  
27  
28 42. Heijmans M, Waverijn G, Rademakers J, van der Vaart R, Rijken M. Functional, communicative  
29 and critical health literacy of chronic disease patients and their importance for self-  
30 management. Patient Educ Couns. 2015;98(1):41–8.  
31  
32 43. van der Heide I, Heijmans M, Schuit AJ, Uiters E, Rademakers J. Functional, interactive and  
33 critical health literacy: Varying relationships with control over care and number of GP visits.  
34 Patient Educ Couns. 2015;98(8):998–1004.  
35  
36 44. Starfield B, Shi L, Macinko J. Contribution of primary care to health systems and health.  
37 Milbank Q. 2005;83(3):457–502.  
38  
39 45. Dietrich AJ, Marton KI. Does continuous care from a physician make a difference? J Fam Pract.  
40 1982;15(5):929–37.  
41  
42 46. Potter SJ, McKinlay JB. From a relationship to encounter: An examination of longitudinal and  
43 lateral dimensions in the doctor-patient relationship. Soc Sci Med. 2005;61(2):465–79.  
44  
45 47. Katz DA, McCoy K, Sarrazin MV. Does Improved Continuity of Primary Care Affect Clinician–  
46 Patient Communication in VA? J Gen Intern Med. 2014;29(S2):682–8.  
47  
48 48. Wallace LS, Cassada DC, Rogers ES, Freeman MB, Grandas OH, Stevens SL, et al. Can Screening  
49 Items Identify Surgery Patients at Risk of Limited Health Literacy? J Surg Res.  
50 2007;140(2):208–13.  
51  
52 49. Sansoni J, Grootemaat P, Duncan C, Samsa P, Eagar K. A Systematic Literature Review on  
53 Question Prompt Lists in Health Care: Final Report. 2014.  
54  
55 50. Domanska OM, Firnges C, Bollweg TM, Sørensen K, Holmberg C, Jordan S. Do adolescents  
56 understand the items of the European Health Literacy Survey Questionnaire (HLS-EU-Q47) -  
57 German version? Findings from cognitive interviews of the project “Measurement of Health  
58 Literacy Among Adolescents” (MOHLAA) in Germany. Arch Public Heal. 2018;76(1).  
59  
60

- 1
  - 2
  - 3
  - 4
  - 5
  - 6
  - 7
  - 8
  - 9
  - 10
  - 11
  - 12
  - 13
  - 14
  - 15
  - 16
  - 17
  - 18
  - 19
  - 20
  - 21
  - 22
  - 23
  - 24
  - 25
  - 26
  - 27
  - 28
  - 29
  - 30
  - 31
  - 32
  - 33
  - 34
  - 35
  - 36
  - 37
  - 38
  - 39
  - 40
  - 41
  - 42
  - 43
  - 44
  - 45
  - 46
  - 47
  - 48
  - 49
  - 50
  - 51
  - 52
  - 53
  - 54
  - 55
  - 56
  - 57
  - 58
  - 59
  - 60
51. Murugesu L, Heijmans M, Fransen M, Rademakers J. Beter omgaan met beperkte gezondheidsvaardigheden in de curatieve zorg: kennis, methoden en tools [Dealing with limited health literacy in curative care: knowledge, methods and tools.]. Utrecht; 2018. 67 p.
52. Kim SH, Utz S. Association of health literacy with health information-seeking preference in older people: A correlational, descriptive study. *Nurs Health Sci.* 2018 Sep;20(3):355–60.
53. Partnership for Clear Health Communication. Ask me 3: Good Questions for Your Health. 2007;
54. Tamura-Lis W. Teach-Back for Quality Education and Patient Safety. *Urol Nurs.* 2013;33(6):267–71.
55. Kripalani S, Weiss BD. Teaching about health literacy and clear communication. *J Gen Intern Med.* 2006;21(8):888–90.
56. Mackert M, Ball J, Lopez N. Health literacy awareness training for healthcare workers: Improving knowledge and intentions to use clear communication techniques. *Patient Educ Couns.* 2011;85(3):e225–8.
57. Karuranga S, Sørensen K, Coleman C, Mahmud AJ. Health Literacy Competencies for European Health Care Personnel. *HLRP Heal Lit Res Pract.* 2017;1(4):e247–56.
58. Ryan JG, Leguen F, Weiss BD, Albury S, Jennings T, Velez F, et al. Will patients agree to have their literacy skills assessed in clinical practice? *Health Educ Res.* 2008;23(4):603–11.
59. Parikh NS, Parker RM, Nurss JR, Baker DW, Williams M V. Shame and health literacy: The unspoken connection. *Patient Educ Couns.* 1996;27(1):33–9.
60. Weiss BD. Health literacy and patient safety: Help patients understand (manual for clinicians). American Medical Association Foundation and American Medical Association. Chicago; 2007.
61. Verlinde E, Poppe A, Desmet A, Hermans K, De Maeseneer J, Van Audenhove C, et al. Social differences in postponing a General Practitioner visit in Flanders, Belgium: Which low-income patients are most at risk? *Heal Soc Care Community.* 2013;21(4):364–72.
62. Pelikan JM, Röthlin F, Ganahl K. Comparative report of health literacy in eight EU member states. The European health literacy survey HLS-EU. 2012.
63. Chew LD, Bradley KA, Boyko EJ. Brief questions to identify patients with inadequate health literacy. *Fam Med.* 2004;36(8):588–94.
64. Chew LD, Griffin JM, Partin MR, Noorbaloochi S, Grill JP, Snyder A, et al. Validation of screening questions for limited health literacy in a large VA outpatient population. *J Gen Intern Med.* 2008;23(5):561–6.
65. Powers BJ, Trinh J V, Bosworth HB. Can This Patient Read and Understand Written Health Information? *JAMA.* 2010;304(1):76.

1  
2  
3  
4  
5  
6  
7  
8  
9  
10  
11  
12  
13  
14  
15  
16  
17  
18  
19  
20  
21  
22  
23  
24  
25  
26  
27  
28  
29  
30  
31  
32  
33  
34  
35  
36  
37  
38  
39  
40  
41  
42  
43  
44  
45  
46  
47  
48  
49  
50  
51  
52  
53  
54  
55  
56  
57  
58  
59  
60

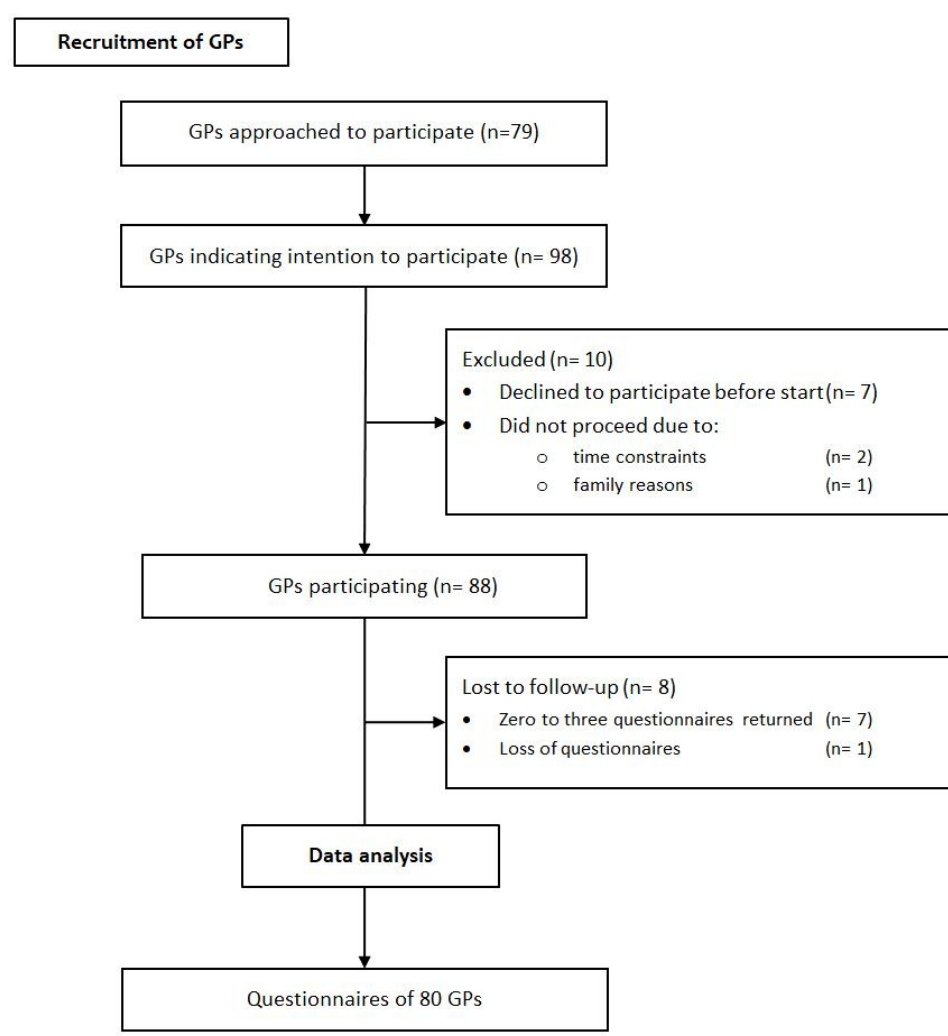

Fig. 1 Recruitment of general practitioners

75x77mm (300 x 300 DPI)

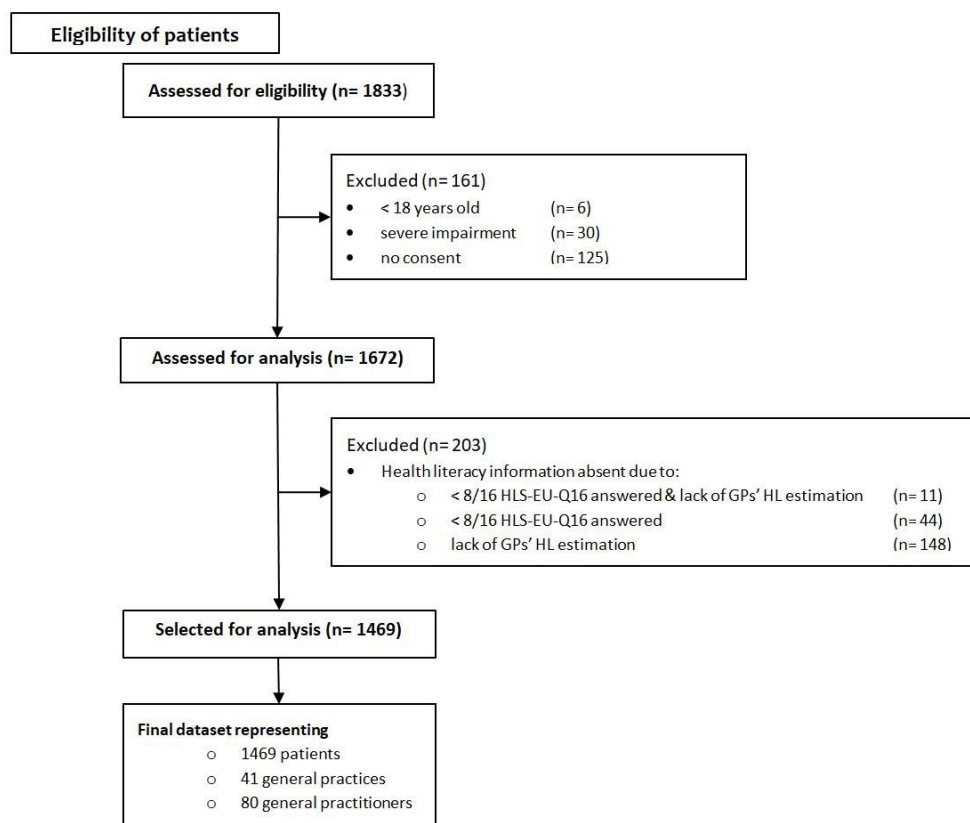

Fig. 2 Flow diagram of excluded questionnaires

95x78mm (300 x 300 DPI)

1  
2  
3  
4  
5  
6  
7  
8  
9  
10  
11  
12  
13  
14  
15  
16  
17  
18  
19  
20  
21  
22  
23  
24  
25  
26  
27  
28  
29  
30  
31  
32  
33  
34  
35  
36  
37  
38  
39  
40  
41  
42  
43  
44  
45  
46  
47  
48  
49  
50  
51  
52  
53  
54  
55  
56  
57  
58  
59  
60

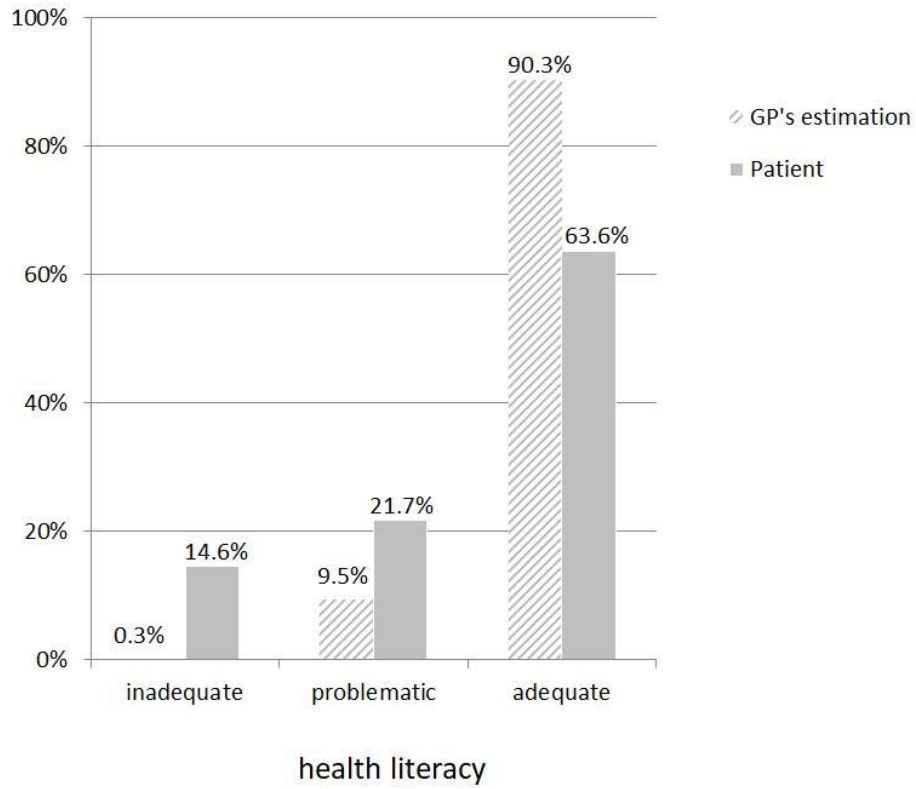

Fig. 3 GPs' health literacy estimations and patients' health literacy (N= 1375)

69x59mm (300 x 300 DPI)

Appendix - Characteristics of excluded patients

|            |                             | < 8/16 HLS-EU-Q16 answered & lack of GPs' HL estimation | < 8/16 HLS-EU-Q16 answered | lack of GPs' health literacy estimation |
|------------|-----------------------------|---------------------------------------------------------|----------------------------|-----------------------------------------|
| N          |                             | 11                                                      | 44                         | 148                                     |
| HLS-EU-Q16 | Items scored (n)            |                                                         |                            |                                         |
|            | 0                           | 7                                                       | 19                         |                                         |
|            | 1                           |                                                         | 1                          |                                         |
|            | 2                           | 1                                                       | 1                          |                                         |
|            | 3                           | 0                                                       | 2                          |                                         |
|            | 4                           | 0                                                       |                            |                                         |
|            | 5                           | 0                                                       | 1                          |                                         |
|            | 6                           | 0                                                       | 2                          |                                         |
|            | 7                           | 3                                                       | 18                         |                                         |
|            | 8                           |                                                         |                            | 18                                      |
|            | 9                           |                                                         |                            | 2                                       |
|            | 10                          |                                                         |                            | 1                                       |
|            | 11                          |                                                         |                            |                                         |
|            | 12                          |                                                         |                            | 2                                       |
|            | 13                          |                                                         |                            | 2                                       |
|            | 14                          |                                                         |                            | 4                                       |
|            | 15                          |                                                         |                            | 5                                       |
| 16         |                             |                                                         | 114                        |                                         |
|            | Missing values              | 0                                                       | 0                          | 0                                       |
|            | Health literacy score on 16 |                                                         |                            |                                         |
|            | 0                           | 7                                                       | 19 (1/7/11)*               |                                         |
|            | 1                           |                                                         | 2 (1/0/1)                  | 1                                       |
|            | 2                           | 1                                                       |                            |                                         |
|            | 3                           |                                                         | 2 (0/1/1)                  |                                         |
|            | 4                           |                                                         | 1 (0/0/1)                  |                                         |
|            | 5                           |                                                         | 4 (1/1/2)                  | 2                                       |
|            | 6                           | 1                                                       | 7 (0/1/6)                  | 7                                       |
|            | 7                           | 2                                                       | 9 (0/1/8)                  | 4                                       |
|            | 8                           |                                                         |                            | 12                                      |
|            | 9                           |                                                         |                            | 8                                       |
|            | 10                          |                                                         |                            | 4                                       |
|            | 11                          |                                                         |                            | 8                                       |
|            | 12                          |                                                         |                            | 7                                       |
|            | 13                          |                                                         |                            | 9                                       |
|            | 14                          |                                                         |                            | 20                                      |
|            | 15                          |                                                         |                            | 15                                      |
|            | 16                          |                                                         |                            | 51                                      |

N= 26  
inadequate  
health literacy

N= 27  
problematic  
health literacy

N= 95  
adequate  
health literacy

\* (GP's estimation that a patient's health literacy is inadequate/problematic/adequate)

## Appendix - Characteristics of excluded patients (continued)

|                             |                                         | < 8/16 HLS-EU-Q16 answered<br>& lack of GPs' HL estimation | < 8/16 HLS-EU-Q16 answered | lack of GPs' health literacy estimation |
|-----------------------------|-----------------------------------------|------------------------------------------------------------|----------------------------|-----------------------------------------|
| <b>N</b>                    |                                         | <b>11</b>                                                  | <b>44</b>                  | <b>148</b>                              |
| <b>PATIENT</b>              | <b>Gender</b>                           |                                                            |                            |                                         |
|                             | female                                  | 6                                                          | 28                         | 85                                      |
|                             | male                                    | 4                                                          | 13                         | 61                                      |
|                             | <i>Missing values</i>                   | 1                                                          | 3                          | 3                                       |
|                             | <b>Education</b>                        |                                                            |                            |                                         |
|                             | no formal education                     | 1                                                          | 6                          | 11                                      |
|                             | primary education                       | 0                                                          | 8                          | 13                                      |
|                             | secondary education                     | 7                                                          | 14                         | 56                                      |
|                             | higher education                        | 2                                                          | 6                          | 61                                      |
|                             | <i>Missing values</i>                   | 1                                                          | 10                         | 8                                       |
|                             | <b>Duration GP-patient relationship</b> |                                                            |                            |                                         |
|                             | <1y                                     |                                                            | 5                          | 2                                       |
|                             | 1-5y                                    |                                                            | 12                         | 7                                       |
| 6-10y                       |                                         | 3                                                          | 6                          |                                         |
| >10y                        |                                         | 24                                                         | 29                         |                                         |
| <i>Missing values</i>       | 10                                      | 0                                                          | 105                        |                                         |
| <b>GENERAL PRACTITIONER</b> | <b>Gender</b>                           |                                                            |                            |                                         |
|                             | female                                  | 6                                                          | 17                         | 83                                      |
|                             | male                                    | 5                                                          | 27                         | 66                                      |
|                             | <i>Missing values</i>                   | 0                                                          | 0                          | 0                                       |
|                             | <b>GPs' health literacy estimation</b>  |                                                            |                            |                                         |
|                             | inadequate                              |                                                            | 3                          |                                         |
|                             | problematic                             |                                                            | 11                         |                                         |
|                             | adequate                                |                                                            | 30                         |                                         |
|                             | <i>Missing values</i>                   | 11                                                         |                            | 149                                     |
|                             | <b>Usual GP or substitution</b>         |                                                            |                            |                                         |
| Usual GP                    |                                         | 41                                                         | 21                         |                                         |
| Substitution                |                                         | 2                                                          | 2                          |                                         |
| <i>Missing values</i>       | 11                                      | 1                                                          | 126                        |                                         |



**STROBE Statement**

Checklist of items that should be included in reports of observational studies

| Section/Topic             | Item No | Recommendation                                                                                                                                                                             | Reported on Page No |
|---------------------------|---------|--------------------------------------------------------------------------------------------------------------------------------------------------------------------------------------------|---------------------|
| <b>Title and abstract</b> | 1       | (a) Indicate the study's design with a commonly used term in the title or the abstract                                                                                                     | 1-2                 |
|                           |         | (b) Provide in the abstract an informative and balanced summary of what was done and what was found                                                                                        | 2                   |
| <b>Introduction</b>       |         |                                                                                                                                                                                            |                     |
| Background/rationale      | 2       | Explain the scientific background and rationale for the investigation being reported                                                                                                       | 2-3                 |
| Objectives                | 3       | State specific objectives, including any prespecified hypotheses                                                                                                                           | 4                   |
| <b>Methods</b>            |         |                                                                                                                                                                                            |                     |
| Study design              | 4       | Present key elements of study design early in the paper                                                                                                                                    | 5                   |
| Setting                   | 5       | Describe the setting, locations, and relevant dates, including periods of recruitment, exposure, follow-up, and data collection                                                            | 5                   |
| Participants              | 6       | (a) <i>Cohort study</i> —Give the eligibility criteria, and the sources and methods of selection of participants. Describe methods of follow-up                                            | 5, Fig. 1 & Fig. 2  |
|                           |         | <i>Case-control study</i> —Give the eligibility criteria, and the sources and methods of case ascertainment and control selection. Give the rationale for the choice of cases and controls |                     |
|                           |         | <i>Cross-sectional study</i> —Give the eligibility criteria, and the sources and methods of selection of participants                                                                      |                     |
| Variables                 | 7       | (b) <i>Cohort study</i> —For matched studies, give matching criteria and number of exposed and unexposed                                                                                   | 5-6                 |
|                           |         | <i>Case-control study</i> —For matched studies, give matching criteria and the number of controls per case                                                                                 |                     |
| Data sources/measurement  | 8*      | Clearly define all outcomes, exposures, predictors, potential confounders, and effect modifiers. Give diagnostic criteria, if applicable                                                   | 5-6                 |
| Bias                      | 9       | For each variable of interest, give sources of data and details of methods of assessment (measurement). Describe comparability of assessment methods if there is more than one group       | 5-15&16             |
| Study size                | 10      | Describe any efforts to address potential sources of bias                                                                                                                                  | 5                   |
| Quantitative variables    | 11      | Explain how the study size was arrived at                                                                                                                                                  | 5                   |
|                           |         | Explain how quantitative variables were handled in the analyses. If applicable, describe which groupings were chosen and why                                                               | 6&7                 |
|                           |         | (a) Describe all statistical methods, including those used to control for confounding                                                                                                      | 7                   |
|                           |         | (b) Describe any methods used to examine subgroups and interactions                                                                                                                        | 7                   |
|                           |         | (c) Explain how missing data were addressed                                                                                                                                                | 7                   |
| Statistical methods       | 12      | (d) <i>Cohort study</i> —If applicable, explain how loss to follow-up was addressed                                                                                                        | 7                   |
|                           |         | <i>Case-control study</i> —If applicable, explain how matching of cases and controls was addressed                                                                                         |                     |
|                           |         | <i>Cross-sectional study</i> —If applicable, describe analytical methods taking account of sampling strategy                                                                               |                     |
|                           |         | (e) Describe any sensitivity analyses                                                                                                                                                      |                     |

| Section/Topic            | Item No | Recommendation                                                                                                                                                                                                  | Reported on Page No    |
|--------------------------|---------|-----------------------------------------------------------------------------------------------------------------------------------------------------------------------------------------------------------------|------------------------|
| <b>Results</b>           |         |                                                                                                                                                                                                                 |                        |
| Participants             | 13*     | (a) Report numbers of individuals at each stage of study—eg numbers potentially eligible, examined for eligibility, confirmed eligible, included in the study, completing follow-up, and analysed               | 5, 7, Fig. 1 & Fig. 2  |
|                          |         | (b) Give reasons for non-participation at each stage                                                                                                                                                            | 5, 7, Fig. 1 & Fig. 2  |
|                          |         | (c) Consider use of a flow diagram                                                                                                                                                                              | Fig. 1 & Fig. 2        |
| Descriptive data         | 14*     | (a) Give characteristics of study participants (eg demographic, clinical, social) and information on exposures and potential confounders                                                                        | 7 & Table 1-3 & Fig. 3 |
|                          |         | (b) Indicate number of participants with missing data for each variable of interest                                                                                                                             | 7 & Table 1-3          |
|                          |         | (c) <i>Cohort study</i> —Summarise follow-up time (eg, average and total amount)                                                                                                                                |                        |
| Outcome data             | 15*     | <i>Cohort study</i> —Report numbers of outcome events or summary measures over time                                                                                                                             |                        |
|                          |         | <i>Case-control study</i> —Report numbers in each exposure category, or summary measures of exposure                                                                                                            |                        |
|                          |         | <i>Cross-sectional study</i> —Report numbers of outcome events or summary measures                                                                                                                              | 7,8                    |
| Main results             | 16      | (a) Give unadjusted estimates and, if applicable, confounder-adjusted estimates and their precision (eg, 95% confidence interval).<br>Make clear which confounders were adjusted for and why they were included | 8 & Table 4            |
|                          |         | (b) Report category boundaries when continuous variables were categorized                                                                                                                                       | 6                      |
|                          |         | (c) If relevant, consider translating estimates of relative risk into absolute risk for a meaningful time period                                                                                                |                        |
|                          |         |                                                                                                                                                                                                                 |                        |
| Other analyses           | 17      | Report other analyses done—eg analyses of subgroups and interactions, and sensitivity analyses                                                                                                                  |                        |
| <b>Discussion</b>        |         |                                                                                                                                                                                                                 |                        |
| Key results              | 18      | Summarise key results with reference to study objectives                                                                                                                                                        | 14                     |
| Limitations              | 19      | Discuss limitations of the study, taking into account sources of potential bias or imprecision. Discuss both direction and magnitude of any potential bias                                                      | 15                     |
| Interpretation           | 20      | Give a cautious overall interpretation of results considering objectives, limitations, multiplicity of analyses, results from similar studies, and other relevant evidence                                      | 14,15                  |
| Generalisability         | 21      | Discuss the generalisability (external validity) of the study results                                                                                                                                           | 15                     |
| <b>Other Information</b> |         |                                                                                                                                                                                                                 |                        |
| Funding                  | 22      | Give the source of funding and the role of the funders for the present study and, if applicable, for the original study on which the present article is based                                                   | 17                     |

*\*Give information separately for cases and controls in case-control studies and, if applicable, for exposed and unexposed groups in cohort and cross-sectional studies.*

**Note:** An Explanation and Elaboration article discusses each checklist item and gives methodological background and published examples of transparent reporting. The STROBE checklist is best used in conjunction with this article (freely available on the Web sites of PLoS Medicine at <http://www.plosmedicine.org/>, Annals of Internal Medicine at <http://www.annals.org/>, and Epidemiology at <http://www.epidem.com/>). Information on the STROBE Initiative is available at [www.strobe-statement.org](http://www.strobe-statement.org).

For peer review only
